# Supplementary material for: The Sinorhizobium meliloti Nitrogen Stress Response Changes Radically in the Face of Concurrent Phosphate Stress
Source: Front Microbiol. 2022 Jan 27;13:800146. doi: 10.3389/fmicb.2022.800146 (PMC8829014; doi:10.3389/fmicb.2022.800146)
Supplement: Supplementary file 2 [file Table_2.XLSX]

## Sheet: Table S2. Nitrogen
			NSRP		NSRp
gene	name	type	log2 fold	q-value	log2 fold	q-value	Cluster	Classification from S. meliloti database (https://iant.toulouse.inra.fr/bacteria/annotation/cgi/rhime.cgi)	description	K # for KEGG path	uniprot accession
SMa0067		CDS	-1.70531	0.0009592			N.II	IV.D.3 carbohydrates, organic acids, alcohols	Putative pentose monosaccharide ABC transporter,periplasmic solute-binding protein	K02058	Q931B1
SMa0079		CDS	-1.43409	0.00250247			N.II	IV.D.2 amino acids, amines, peptides	ABC transporter,permease	K02029	Q931A5
SMa0082		CDS	-1.34516	0.000512143			N.II	IV.D.2 amino acids, amines, peptides	ABC transporter,periplasmic solute-binding protein	K02030	Q931A3
SMa0083		CDS	-1.07005	0.00889017			N.II	IV.D.2 amino acids, amines, peptides	ABC transporter,ATP-binding protein	K02028	Q931A2
SMa0089		CDS	1.54658	0.00285916	3.0223	0.000512143	N.I	VI.C Hypothetical/Global homology	conserved hypothetical protein		Q930Z9
SMa0093		CDS			1.70835	0.0009592	N.III	I.I.3 amino acids	Branched-chain amino acid aminotransferase	K00824	Q930Z7
SMa0114		CDS			-1.21639	0.00320928	N.III	VI.A Not classified regulator	two-component response regulator		Q930Y6
SMa0124	groEL3	CDS	-1.37505	0.000512143			N.II	IV.B Chaperoning	6 kDa chaperonin	K04077	Q930Y0
SMa0125	groES3	CDS			1.17376	0.00176271	N.III	IV.B Chaperoning	1 kDa chaperonin	K04078	Q930X9
SMa0134		CDS			-2.95	0.000512143	N.III	VI.C Hypothetical/Global similarity	conserved hypothetical protein		Q930X4
SMa0136		CDS			-1.18099	0.00513758	N.III	VI.C Hypothetical/Global similarity	conserved hypothetical protein		Q930X3
SMa0203		CDS	-1.50619	0.000512143			N.II	IV.D.3 carbohydrates, organic acids, alcohols	ABC transporter,periplasmic solute-binding protein,likely transports galactose and,to a lesser extent,L-arabinose,glucose,D-arabinose,L-fucose and D- fucose	K10439	Q930T8
SMa0235		CDS	-1.0103	0.00889017	1.09996	0.00452512	N.I	I Small Molecule Metabolism	dihydroxy-acid dehydratase	K22186	Q930R9
SMa0252	gntC	CDS	-1.44938	0.000512143			N.II	IV.D.3 carbohydrates, organic acids, alcohols	TRAP-type periplasmic solute-binding protein,required for growth on gluconate	K21395	Q930R1
SMa0347		CDS			-1.26274	0.00777209	N.III	VI.A Not classified regulator	Transcriptional regulator,LysR family		Q930K8
SMa0389		CDS			1.14431	0.00250247	N.III	I Small Molecule Metabolism	short chain alcohol dehydrogenase-related dehydrogenase		Q930I9
SMa0392		CDS	1.66551	0.000512143			N.II	IV.D Transport of small molecules	ABC transporter,periplasmic solute-binding protein	K02055	Q930I7
SMa0436		CDS			1.69258	0.000512143	N.III	VI.C Hypothetical/Global homology	hypothetical protein		Q930G7
SMa0581	nrtC	CDS	2.3123	0.00749637			N.II	IV.D Transport of Small molecules	Nitrate transporter,ATP binding protein	K15578	Q92ZZ3
SMa0583	nrtB	CDS	2.40893	0.00213505	-1.74466	0.00832418	N.I	IV.D Transport of small molecules	Nitrate transporter,permease	K15577	Q92ZZ2
SMa0585	nrtA	CDS	3.85126	0.000512143			N.II	IV.D Transport of small molecules	Nitrate transporter,periplasmic nitrate binding protein	K15576	Q92ZZ1
SMa0630		CDS	-1.68062	0.00320928			N.II	VI.C Hypothetical/Global similarity	conserved hypothetical transmembrane protein	K22044	Q92ZW7
SMa0664		CDS			1.08736	0.00176271	N.III	VI.C Hypothetical/Global homology	conserved hypothetical protein		Q92ZU8
SMa0667		CDS	-1.60282	0.0091608			N.II	VI.C Hypothetical/Global similarity	conserved hypothetical protein		Q92ZU6
SMa0684		CDS	-1.35926	0.00602255			N.II	IV.D Transport of small molecules	amino acid transporter	K03294	Q92ZT6
SMa0687		CDS			1.55592	0.000512143	N.III	VI.C Hypothetical/Global homology	hypothetical protein		Q92ZT5
SMa0693	arcA1	CDS	-1.52836	0.00944057			N.II	I.I.3 amino acids	ArcA1 arginine deiminase	K01478	Q92ZT2
SMa0709		CDS	-1.8708	0.00176271			N.II	IV.D Transport of small molecules	ABC transporter,periplasmic solute-binding protein	K02027	Q92ZS4
SMa0762	fixK2	CDS			-4.40428	0.00137247	N.III	I.G.1 electron transport	FixK2 transcriptional regulator	K15861	Q92ZP2
SMa0763		CDS	-1.85594	0.00420562			N.II	V.I.B Hypothetical protein/partial homology	hypothetical protein	K07005	Q92ZP1
SMa0853	nodE	CDS			1.21969	0.00482954	N.III	IV.H Nodulation	NodE beta ketoacyl ACP synthase	K14660	P06230
SMa0969		CDS			-1.83179	0.00832418	N.III	VI.A Not classified regulator	Response regulator	K07657	Q92ZG1
SMa1033		CDS			-1.12187	0.00320928	N.III	VI.C Hypothetical/Global similarity	conserved hypothetical protein		Q92ZD0
SMa1038		CDS			-1.41294	0.0009592	N.III	I.H Energy metabolism, carbon	Multicopper oxidase	K22348	Q92ZC7
SMa1077	nex18	CDS	-2.05722	0.000512143			N.II	VI.A Not classified regulator	Nex18 Symbiotically induced conserved protein		Q92ZA8
SMa1095		CDS	-2.05963	0.000512143			N.II	V.I.B Hypothetical protein/partial homology	hypothetical protein		Q92Z97
SMa1126		CDS	-2.04437	0.00137247			N.II	II.A.4 degradation of proteins, peptides, glycopeptides	Putative protease,transmembrane protein	K06402	Q92Z83
SMa1146		CDS	-1.48146	0.00832418			N.II	VI.C Hypothetical/Global similarity	conserved hypothetical protein	K09181	Q92Z73
SMa1151		CDS	-1.83935	0.00285916			N.II	VI.C Hypothetical/Global similarity	Conserved hypothetical protein	K07005	Q92Z70
SMa1154		CDS	-2.25023	0.000512143			N.II	VI.C Hypothetical/Global similarity	conserved hypothetical protein		Q92Z68
SMa1156		CDS	-2.25733	0.00176271			N.II	I.H Energy metabolism, carbon	Alcohol dehydrogenase,Zn-dependent class III		Q92Z66
SMa1158		CDS	-1.85048	0.00387636			N.II	VI.C Hypothetical/Global similarity	Conserved hypothetical protein		Q92Z65
SMa1169		CDS	-1.96902	0.000512143			N.II	V.I.B Hypothetical protein/partial homology	hypothetical protein		Q92Z57
SMa1195		CDS	-2.20471	0.00137247			N.II	VI.C Hypothetical/Global similarity	conserved hypothetical protein	K07322	Q92Z45
SMa1200		CDS	-2.15685	0.000512143			N.II	VI.C Hypothetical/Global similarity	conserved hypothetical protein	K09796	Q92Z42
SMa1213	fixP1	CDS	-2.03161	0.00354496			N.II	I.G.1 electron transport	FixP1 di-heme c-type cytochrome	K00406	Q05577
SMa1225	fixK1	CDS			-4.60004	0.000512143	N.III	I.F.6 nitrogen fixation	FixK1 transcriptional regulator	K15861	P13295
SMa1232	napC	CDS	-1.83843	0.00285916			N.II	I.H.2 anaerobic respiration	NapC membrane-bound tetraheme cytochrome c subunit	K02569	Q92Z38
SMa1252	nnrS	CDS	-1.68323	0.00354496			N.II	VI.C Hypothetical/Global similarity	NnrS family protein	K07234	Q92Z28
SMa1259		CDS	-1.81601	0.00320928			N.II	VI.C Hypothetical/Global similarity	conserved hypothetical protein		Q92Z23
SMa1269	norD	CDS			-1.6572	0.00137247	N.III	I.F.5 nitrogen metabolism	NorD accessory protein for nitric oxide reductase	K02448	Q92Z18
SMa1273	norB	CDS	-1.8101	0.000512143			N.II	I.F.5 nitrogen metabolism	NorB nitric oxide reductase,large subunit	K04561	Q92Z16
SMa1276	norC	CDS	-1.85887	0.00250247			N.II	I.F.5 nitrogen metabolism	NorC nitric oxide reductase,small subunit	K02305	Q92Z15
SMa1296	adhA1	CDS	-2.02028	0.00387636			N.II	I.H.1 fermentation	Alcohol dehydrogenase,Zn-dependent class III	K13953	O31186
SMa1353		CDS	-0.996733	0.00889017			N.II	I Small Molecule Metabolism	Isomerase		Q92YX3
SMa1364		CDS			-1.32742	0.00944057	N.III	IV.D Transport of small molecules	ABC transporter,periplasmic solute-binding protein	K02027	Q92YW6
SMa1495		CDS	2.59245	0.000512143			N.II	I.F Central intermediary metabolism	Aminotransferase	K00830	Q92YP9
SMa1587	eglC	CDS	1.17227	0.00176271			N.II	III.A Cell Exterior	EglC Endo-1,3-1,4-beta-glycanase		Q9Z3Q2
SMa1680		CDS			1.25498	0.00176271	N.III	VI.C Hypothetical/Global homology	conserved hypothetical protein		Q92YF8
SMa1698	syrB1	CDS	-1.26896	0.0009592			N.II	VI.A Not classified regulator	SyrB1 regulator	K07497	O33685
SMa1705		CDS			-1.50964	0.00213505	N.III	VI.A Not classified regulator	Transcriptional regulator,MucR family		O33682
SMa1747		CDS	1.1746	0.00513758			N.II	IV.D.5 incorporation metal ions	TonB-dependent siderophore receptor	K02014	Q92YC1
SMa1757		CDS	-1.15521	0.00137247			N.II	I.F.6 nitrogen fixation	short chain alcohol dehydrogenase-related dehydrogenase	K00059	Q92YB4
SMa1811		CDS			1.23655	0.00213505	N.III	VI.C Hypothetical/Global homology	conserved hypothetical protein		Q92Y89
SMa1860		CDS	1.192	0.00137247			N.II	IV.D Transport of small molecules	ABC transporter,periplasmic solute-binding protein	K02035	Q92Y64
SMa1927		CDS	-0.984181	0.00832418			N.II	VI.C Hypothetical/Global similarity	Conserved hypothetical protein		Q92Y30
SMa1961		CDS			1.21505	0.00137247	N.III	I.I.4 carbon compounds	polyhydroxybutyrate depolymerase		Q92Y13
SMa2002		CDS	-1.04544	0.00720208			N.II	I Small Molecule Metabolism	hydrolase		Q92XZ1
SMa2061		CDS			-1.56944	0.000512143	N.III	VI.C Hypothetical/Global homology	conserved hypothetical protein	K08482	Q92XW4
SMa2063		CDS			-1.17993	0.00320928	N.III	VI.A Not classified regulator	Sensor histidine kinase		Q92XW3
SMa2073		CDS	2.21579	0.00387636			N.II	VI.C Hypothetical/Global homology	conserved hypothetical protein		Q92XV8
SMa2075		CDS	3.51248	0.000512143			N.II	IV.D Transport of small molecules	ABC transporter,periplasmic solute-binding protein	K02035	Q92XV7
SMa2209		CDS	-1.40156	0.00573901			N.II	IV.D Transport of small molecules	ABC transporter,periplasmic solute-binding protein	K02055	Q92XQ2
SMa2297		CDS	1.354	0.00137247	-2.92025	0.000512143	N.I	VI.B Hypothetical/Partial homology	hypothetical protein		Q92XK7
SMa2299		CDS			-2.90442	0.000512143	N.III	VI.B Hypothetical/Partial homology	hypothetical protein		Q92XK6
SMa2329	kdpC	CDS			-3.62023	0.000512143	N.III	IV.D.4 cations	KdpC potassium-transporting ATPase C chain	K01548	Q92XJ1
SMa2331	kdpB	CDS			-3.52728	0.000512143	N.III	IV.D.4 cations	KdpB potassium-transporting ATPase B chain	K01547	Q92XJ0
SMa2333	kdpA	CDS			-4.05511	0.000512143	N.III	IV.D.4 cations	KdpA potassium-transporting ATPase A chain	K01546	Q92XI9
SMa2347		CDS	-1.40962	0.00176271			N.II	VI.C Hypothetical/Global homology	conserved hypothetical protein	K15256	Q92XI2
SMa2351		CDS			-1.32023	0.0091608	N.III	I Small Molecule Metabolism	oxidoreductase	K11178	Q92XI0
SMa2353		CDS			-1.28589	0.000512143	N.III	I Small Molecule Metabolism	oxidoreductase	K11177	Q92XH9
SMa2355	dinB2	CDS			1.51848	0.000512143	N.III	II.B.8 DNA - replication, repair, restr./modif.	DNA polymerase IV	K02346	Q92XH8
SMa2410	rhbF	CDS	2.57612	0.000512143			N.II	IV.D.5 incorporation metal ions	RhbF rhizobactin biosynthesis protein		Q9Z3Q7
SMa2414	rhtA	CDS	3.27665	0.000512143			N.II	VI.A Not classified regulator	RhtA rhizobactin transporter	K02014	Q9Z3Q5
SMa5002		CDS			-3.06004	0.000512143	N.III	VI.C Hypothetical/Global similarity	conserved hypothetical protein		B3KLW3
SMa5006		CDS			1.05906	0.00602255	N.III	VI.C Hypothetical/Global homology	conserved hypothetical protein		B3KLY2
SMa5027		CDS			-1.4108	0.00285916	N.III	VI.D Unknown	hypothetical protein		B3KLX5
SMa6000		ncRNA			1.77428	0.000512143	N.III
SMa6371		CDS			1.20182	0.00354496	N.III
SMa6506		ncRNA	1.43228	0.0009592	2.49152	0.000512143	N.I		aR14
SMb20007	katC	CDS			-1.47857	0.0009592	N.III	IV.G.4 detoxification	Catalase	K03781
SMb20020	pdh	CDS	-1.26044	0.00285916			N.II	I.H.6 TCA cycle	Pyruvate dehydrogenase (acetyl-transferring)	K11381	Q92XD9
SMb20025		CDS	-1.27427	0.00250247	1.48642	0.000512143	N.I	VI.C Hypothetical/Global similarity	Conserved hypothetical protein	K07795	Q92XD4
SMb20026		CDS	-1.3771	0.000512143			N.II	VI.C Hypothetical/Global similarity	Conserved hypothetical protein	K07794	Q92XD3
SMb20027		CDS	-1.45526	0.000512143			N.II	VI.C Hypothetical/Global homology	Conserved hypothetical protein	K07793	Q92XD2
SMb20033		CDS	-1.53538	0.000512143			N.II	VI.A Not classified regulator	Transcription regulator,TetR family		Q92XC6
SMb20034		CDS	-2.78193	0.00420562			N.II	IV.D.3 carbohydrates, organic acids, alcohols	Putative TRAP-type quinic acid transporter,small permease component	K21394	Q92XC5
SMb20035		CDS	-2.88015	0.00250247			N.II	IV.D.3 carbohydrates, organic acids, alcohols	Putative TRAP-type quinic acid transporter,large permease component	K21393	Q92XC4
SMb20036		CDS	-2.86285	0.000512143			N.II	IV.D.3 carbohydrates, organic acids, alcohols	Putative TRAP-type quinic acid transporter,periplasmic solute-binding protein	K21395	Q92XC3
SMb20037	aroE2	CDS	-2.80467	0.000512143			N.II	I.A.5 chorismate	Putative shikimate 5-dehydrogenase	K00014	Q92XC2
SMb20046	repA1	CDS			1.00807	0.00832418	N.III	II.B.8 DNA - replication, repair, restr./modif.	Probable replication protein A		Q92XB3
SMb20066		CDS			-1.91068	0.00513758	N.III	VI.C Hypothetical/Global similarity	Hypothetical protein		Q92X96
SMb20076		CDS			-1.85043	0.00354496	N.III	I Small Molecule Metabolism	short chain alcohol dehydrogenase/reductase involved in D-fucose,lysine,leucine and proline utilization		Q92X86
SMb20079		CDS	1.25504	0.000512143	1.12419	0.00513758	N.I	VI MISCELLANEOUS	Putaive haemolysin-type calcium-binding protein		Q92X83
SMb20103		CDS			1.2353	0.00420562	N.III	I Small Molecule Metabolism	Probable FAD-dependent oxidoreductase	K07222	Q92X59
SMb20105		CDS			1.05553	0.00720208	N.III	VI.A Not classified regulator	Putative transcriptional regulator		Q92X57
SMb20107		CDS	-1.41893	0.00213505			N.II	VI.C Hypothetical/Global homology	Conserved hypothetical protein		Q92X55
SMb20108		CDS	-1.906	0.000512143			N.II	IV.D.2 amino acids, amines, peptides	Putative ABC transporter periplasmic oligopeptide-binding protein	K02035	Q92X54
SMb20116		CDS			-1.2486	0.00176271	N.III	VI.C Hypothetical/Global similarity	Conserved hypothetical protein		Q92X46
SMb20117		CDS			-1.39195	0.000512143	N.III	III.A.1 surface polysaccharides/antigens	Hypothetical sugar transferase protein	K12995	Q92X45
SMb20157		CDS			-1.4346	0.00213505	N.III	IV CELL PROCESSES	Hypothetical ABC transporter periplasmic solute-binding protein	K02012	Q92X05
SMb20158		CDS	-1.66364	0.00213505			N.II	IV CELL PROCESSES	Hypothetical ABC transporter periplasmic solute-binding protein	K02012	Q92X04
SMb20164		CDS	-2.23366	0.000512143			N.II	VI.A Not classified regulator	Putative two-component sensor histidine kinase containing a receiver domain		Q92WZ8
SMb20171		CDS			-1.14197	0.0069235	N.III	IV.G.4 detoxification	Putative S-formylglutathione hydrolase	K01070	Q92WZ1
SMb20172		CDS			-1.98705	0.000512143	N.III	I.G.1 electron transport	Putative cytochrome c	K08738	Q92WZ0
SMb20173		CDS			-1.87089	0.000512143	N.III	I.I.4 carbon compounds	Putative methanol dehydrogenase protein,large subunit	K23995	Q92WY9
SMb20174		CDS			-1.86983	0.0009592	N.III	I.G.1 electron transport	Putative cytochrome c		Q92WY8
SMb20179		CDS			-1.26731	0.00354496	N.III	VI.C Hypothetical/Global similarity	Conserved hypothetical protein		Q92WY3
SMb20186	gfa	CDS			-1.68416	0.000512143	N.III	I.I.4 carbon compounds	Glutathione-dependent formaldehyde-activating enzyme	K03396
SMb20198	cbbL	CDS	2.01285	0.000512143			N.II	I.F Central intermediary metabolism	Putative ribulose-1,5-bisphosphate carboxylase large subunit	K01601
SMb20234		CDS	-1.53906	0.000512143			N.II	VI.C Hypothetical/Global homology	Hypothetical protein		Q92WV4
SMb20235		CDS	-1.77485	0.000512143			N.II	IV.D.3 carbohydrates, organic acids, alcohols	Putative sugar ABC transporter ATP-binding protein	K10112	Q92WV3
SMb20295		CDS	-1.45843	0.000512143			N.II	IV.D.3 carbohydrates, organic acids, alcohols	Putative TRAP-type dicarboxylate transporter,periplasmic solute-binding component		Q92WP4
SMb20316		CDS	-1.6392	0.000512143			N.II	IV.D.3 carbohydrates, organic acids, alcohols	Putative erythritol ABC transporter,periplasmic solute-binding protein	K02058	Q92WN0
SMb20349		CDS	-1.34582	0.00285916			N.II	IV.D.3 carbohydrates, organic acids, alcohols	ABC transporter,periplasmic solute-binding protein,possible erythritol transport protein	K17202	Q92WK4
SMb20372		CDS			-1.40446	0.00320928	N.III	IV.D Transport of small molecules	Putative TRAP-type transporter,large permease component		Q92WI1
SMb20374		CDS	-1.70092	0.00861167			N.II	IV.D Transport of small molecules	Putative TRAP-type transporter,periplasmic substrate-binding protein		Q92WH9
SMb20389		CDS			1.08419	0.00320928	N.III	VI.A Not classified regulator	Diguanylate cyclase		Q92WG4
SMb20416	ugpB	CDS	-1.09083	0.00320928			N.II	IV.D.3 carbohydrates, organic acids, alcohols	Probable ABC transporter periplasmic glycerol-3-phosphate-binding protein precursor	K05813
SMb20420		CDS	-1.56041	0.000512143			N.II	VI MISCELLANEOUS	Glutathione transferase	K00799	Q92WD5
SMb20436		CDS	3.49156	0.000512143			N.II	IV.D.3 carbohydrates, organic acids, alcohols	Probable nitrate transporter	K02575	Q92WC1
SMb20454		CDS			-4.14316	0.000512143	N.III	VI.C Hypothetical/Global homology	Conserved hypothetical protein		Q92WA8
SMb20480		CDS	-1.07918	0.00573901			N.II	VI.A Not classified regulator	Putative transcriptional regulator		Q92W83
SMb20481	asnO	CDS	-1.46354	0.0009592			N.II	I.A.14 asparagine	Asparagine synthase	K01953	Q92W82
SMb20482		CDS	-1.56198	0.000512143			N.II	VI.C Hypothetical/Global homology	Conserved hypothetical protein		Q92W81
SMb20484	supA	CDS	-2.24618	0.000512143			N.II	IV.D.3 carbohydrates, organic acids, alcohols	Putative ABC transporter periplasmic sugar-binding protein	K02058	Q92W79
SMb20485	supB	CDS	-2.3621	0.00213505			N.II	IV.D.3 carbohydrates, organic acids, alcohols	Putative sugar ABC transporter ATP-binding protein	K02056	Q92W78
SMb20488		CDS	-2.94331	0.000512143			N.II	I Small Molecule Metabolism	Putative isomerase	K18910	Q92W75
SMb20489		CDS	-2.91792	0.000512143			N.II	I.H Energy metabolism, carbon	Probable carbohydrate kinase		Q92W74
SMb20490	fucA2	CDS	-2.60193	0.000512143			N.II	I.I.4 carbon compounds	L-fuculose-phosphate aldolase	K01628	Q92W73
SMb20509		CDS			1.46731	0.00176271	N.III	VI.A Not classified regulator	Putative transcriptional regulator		Q92W54
SMb20569		CDS	2.64054	0.00387636			N.II	IV.D.2 amino acids, amines, peptides	Putative amine ABC transporter,ATP-binding protein	K02049	Q92TM9
SMb20570		CDS	2.44027	0.000512143			N.II	IV.D.2 amino acids, amines, peptides	Putative amine ABC transporter,periplasmic solute-binding protein		Q926E3
SMb20571		CDS	2.7746	0.00777209			N.II	IV.D.2 amino acids, amines, peptides	Putative amine ABC transporter,permease component	K02050	Q92TM8
SMb20592	rpoE8	CDS			2.8678	0.000512143	N.III	I.E.1 global regulatory functions	aR14 RNA polymerase sigma factor,ECF subfamily protein	K03088	Q92TK7
SMb20611	dctA	CDS	3.31583	0.000512143	1.30262	0.00137247	N.I	IV.D.3 carbohydrates, organic acids, alcohols	C4-dicarboxylate transport protein	K11103
SMb20615	thiC	CDS			1.02758	0.00354496	N.III	I.B.8 thiamin	Putative thiamine biosynthesis protein	K03147
SMb20630		CDS	-1.04796	0.0091608			N.II	IV.D.3 carbohydrates, organic acids, alcohols	Putative sugar uptake ABC transporter ATP-binding protein	K10111	Q92TH6
SMb20631		CDS	-1.53966	0.000512143			N.II	VI.C Hypothetical/Global homology	Conserved hypothetical protein	K09955	Q92TH5
SMb20651		CDS			1.37473	0.000512143	N.III	I.C Fatty acid biosynthesis	Acyl carrier protein		Q92TY4
SMb20704	glgA2	CDS			-1.65133	0.000512143	N.III	II.B.5 polysaccharides - (cytoplasmic)	Putative glycogen synthase	K00703
SMb20720		CDS	-1.69063	0.000512143			N.II	IV.D.3 carbohydrates, organic acids, alcohols	Putative sugar uptake ABC transporter periplasmic solute-binding protein precursor	K10439	Q926E5
SMb20745	glnII	CDS	4.5669	0.000512143	1.90455	0.000512143	N.I	I.A.18 glutamine	Glutamate-ammonia ligase	K01915	Q92TR3
SMb20746	gstI	CDS	-2.32071	0.00544021			N.II	I.A.18 glutamine	Glutamine synthetase translation inhibitor		Q92TR2
SMb20748	pssF	CDS			-1.11972	0.00749637	N.III	III.A.1 surface polysaccharides/antigens	Putative glycosyltransferase		Q92TR0
SMb20769		CDS			-1.28951	0.00661481	N.III	VI.C Hypothetical/Global homology	Conserved hypothetical membrane protein	K07793	Q92TP6
SMb20771		CDS			-1.40969	0.00285916	N.III	VI.C Hypothetical/Global similarity	Conserved hypothetical protein	K07795	Q92TP4
SMb20809	kpsF1	CDS	1.32413	0.000512143			N.II	III.A.1 surface polysaccharides/antigens	Arabinose-5-phosphate isomerase	K06041	Q92VZ8
SMb20837		CDS			-3.68451	0.000512143	N.III	VI.C Hypothetical/Global similarity	Hypothetical protein		Q92VW7
SMb20838		CDS	1.99265	0.00661481	-3.72938	0.000512143	N.I	VI MISCELLANEOUS	Calcium binding protein		Q92VW6
SMb20876		CDS			1.63496	0.000512143	N.III	VI.C Hypothetical/Global homology	Hypothetical protein		Q92UG1
SMb20880	rhlE2	CDS			1.60825	0.000512143	N.III	II.B.6 RNA synthesis, modification, DNA transcription	Putative ATP-dependent RNA helicase	K11927	Q92UF7
SMb20887		CDS	1.17897	0.00137247			N.II	VI.C Hypothetical/Global homology	Conserved hypothetical protein		Q92UF0
SMb20902		CDS	-1.27302	0.000512143			N.II	IV.D.3 carbohydrates, organic acids, alcohols	ABC transporter,periplasmic solute-binding protein,likely transports mannose,L-lyxose,glucose and sorbose	K10543	Q926F3
SMb20904		CDS	-1.10751	0.00832418			N.II	IV.D.3 carbohydrates, organic acids, alcohols	ABC transporter,ATP-binding protein,likely transports mannose,L-lyxose,glucose and sorbose	K10545	Q92UD4
SMb20905		CDS			1.31352	0.00213505	N.III	V.A Transposon-related functions	Putative transposase	K07497	Q92UD3
SMb20928		CDS			-1.93984	0.00777209	N.III	II.A.4 degradation of proteins, peptides, glycopeptides	Putative exported carboxyl-terminal protease		Q92UP4
SMb20936		CDS			1.15348	0.00176271	N.III	VI.B Hypothetical/Partial homology	Hypothetical protein		Q92UP0
SMb20941	exsA	CDS	-2.07174	0.000512143			N.II	III.A.1 surface polysaccharides/antigens	MsbA-like saccharide exporting ABC transporter protein,consisting of ATP-binding and permease domains	K06147	Q7ANN9
SMb20945	exoF1	CDS	1.03611	0.00573901			N.II	III.A.1 surface polysaccharides/antigens	Periplasmic protein involved in polysaccharide export	K16552
SMb20946	exoY	CDS	1.24818	0.0009592			N.II	III.A.1 surface polysaccharides/antigens	Exopolysaccharide production protein,probable sugar transferase involved in lipopolysaccharide synthesis,regulated by ExoR	K16566
SMb20954	exoH	CDS	2.15532	0.000512143			N.II	III.A.1 surface polysaccharides/antigens	Succinyltransferase	K16560
SMb20955	exoK	CDS	1.80317	0.000512143			N.II	II.A.3 degradation of polysaccharides	Licheninase	K16559
SMb20984	nirB	CDS	4.82429	0.000512143			N.II	I.H Energy metabolism, carbon	Nitrite reductase [NAD(P)H]	K00362	Q92UL8
SMb20985	nirD	CDS	2.09654	0.00832418			N.II	I.H Energy metabolism, carbon	Nitrite reductase [NAD(P)H]	K00363	Q92UL7
SMb20986	narB	CDS			1.74821	0.000512143	N.III	I.H Energy metabolism, carbon	Putative nitrate reductase,large subunit	K00372	Q92UL6
SMb20992		CDS	1.31724	0.000512143			N.II	VI.C Hypothetical/Global similarity	Conserved hypothetical protein,similar to Y2991		Q92UL0
SMb20995	engA	CDS			1.04018	0.00970149	N.III	I Small Molecule Metabolism	Putative GTP-binding protein	K03977
SMb20996		CDS			1.01036	0.00777209	N.III	VI.C Hypothetical/Global similarity	Conserved hypothetical protein		Q92UK5
SMb21009	glpK	CDS	-1.40501	0.000512143			N.II	I.F.18 pool of unassigned individual reversible reactions	Probable glycerol kinase,similar to sugar kinases protein	K00864
SMb21079		CDS			1.17752	0.00387636	N.III	VI.A Not classified regulator	Putative cAMP binding transcription regulator,CRP family		Q92VP1
SMb21094	argH2	CDS	-1.8294	0.00573901			N.II	I.A.17 arginine	Probable argininosuccinate lyase	K01755
SMb21097		CDS	-1.14801	0.00137247			N.II	IV.D.2 amino acids, amines, peptides	ABC transporter,periplasmic solute-binding protein	K02030	Q926H5
SMb21098		CDS	-1.37642	0.000512143			N.II	VI.C Hypothetical/Global homology	Hypothetical membrane-anchored protein		Q92VM3
SMb21115		CDS	2.48088	0.000512143	1.28402	0.00805017	N.I	VI.A Not classified regulator	Putative response regulator	K07183	Q92VK7
SMb21122	mccA	CDS			-1.42451	0.00544021	N.III	I.I.3 amino acids	Putative methylcrotonoyl-CoA carboxylase non-biotinylated subunit	K01969	Q92VK0
SMb21130	cysA2	CDS	1.55215	0.000512143			N.II	IV.D.1 anions	Sulfate-transporting ATPase	K02045
SMb21133		CDS	1.8419	0.000512143			N.II	IV.D.1 anions	Putative sulfate uptake ABC transporter,periplasmic solute-binding protein	K23163	Q926B6
SMb21134		CDS			1.03495	0.00632638	N.III	I.F.14 amino acids	Amino acid aldolase or racemase		Q92VI9
SMb21135		CDS			1.84988	0.000512143	N.III	IV.D.7 Other transport	ABC transporter,periplasmic solute-binding protein,may be involved in transport of sugar amines (galactosamine and glucosamine)	K02030	Q926H3
SMb21168		CDS			1.16719	0.00944057	N.III	IV.D Transport of small molecules	Putative integral membrane transporter		Q92V77
SMb21176	phoD	CDS	1.58315	0.00320928			N.II	IV.D.1 anions	Phosphate uptake ABC transporter periplasmic solute-binding protein precursor	K02044	Q7ANR1
SMb21186	gabT	CDS	1.61151	0.000512143			N.II	I.F.18 pool of unassigned individual reversible reactions	Putative 4-aminobutyrate aminotransferase	K00823	Q92V64
SMb21188		CDS	3.01443	0.00213505			N.II	III.A.1 surface polysaccharides/antigens	Putative acyltransferase,possibly surface-saccharide specific acetyltransferase		Q92V62
SMb21189		CDS	2.12196	0.00285916			N.II	III.A.1 surface polysaccharides/antigens	Putative glycosyltransferase		Q92V61
SMb21236		CDS			1.03522	0.00602255	N.III	VI.C Hypothetical/Global homology	Hypothetical protein		Q92VG5
SMb21251		CDS			1.1463	0.00387636	N.III	VI.C Hypothetical/Global homology	Conserved hypothetical membrane protein,similar to Y158	K22044	Q92VF1
SMb21270		CDS			1.29027	0.000512143	N.III	VI.A Not classified regulator	Putative cyclic nucleotide-binding protein		Q92VD3
SMb21271		CDS			1.07474	0.00354496	N.III	VI.C Hypothetical/Global similarity	Conserved hypothetical protein		Q92VD2
SMb21318	wgcA	CDS			1.61565	0.000512143	N.III	III.A.1 surface polysaccharides/antigens	Putative glycosyltransferase,forming alpha-glycosyl linkages protein WgcA (formerly ExpC)		Q7ANQ1
SMb21329		CDS			2.31283	0.000512143	N.III	VI.D Unknown	Hypothetical exported peptide protein		Q92V28
SMb21334		CDS			-2.68489	0.000512143	N.III	VI.B Hypothetical/Partial homology	Hypothetical exported glutamine-rich protein		Q92V23
SMb21336		CDS			-1.4319	0.00420562	N.III	VI.A Not classified regulator	Putative transcriptional regulator,AraC family protein	K07506	Q92V21
SMb21357		CDS			-1.43455	0.00176271	N.III	VI.C Hypothetical/Global similarity	Hypothetical membrane protein		Q92V01
SMb21440		CDS	2.7357	0.000512143	-3.63173	0.000512143	N.I	VI.C Hypothetical/Global similarity	Conserved hypothetical protein,signal peptide		Q92U70
SMb21441		CDS			-1.38035	0.00176271	N.III	VI.C Hypothetical/Global similarity	Conserved hypothetical protein		Q92U69
SMb21442		CDS			-1.9316	0.000512143	N.III	VI.B Hypothetical/Partial homology	Hypothetical protein		Q92U68
SMb21444		CDS			-2.30946	0.00452512	N.III	VI.C Hypothetical/Global homology	Hypothetical protein		Q92U66
SMb21452		CDS			-2.25679	0.00889017	N.III	VI.B Hypothetical/Partial homology	Hypothetical protein		Q92U59
SMb21454		CDS			-1.57289	0.000512143	N.III	VI.C Hypothetical/Global homology	Hypothetical protein		Q92U58
SMb21487	cyoA	CDS	-2.35846	0.000512143			N.II	I.H.3 aerobic respiration	Putative cytochrome o ubiquinol oxidase chain II	K02297	Q92U27
SMb21488	cyoB	CDS	-2.12702	0.000512143			N.II	I.H.3 aerobic respiration	Putative cytochrome o ubiquinol oxidase chain I	K02298	Q92U26
SMb21494	ocd	CDS	-1.32586	0.000512143			N.II	I.I.3 amino acids	Putative ornithine cyclodeaminase	K01750	Q92U20
SMb21506		CDS			1.13351	0.00749637	N.III	III.A.1 surface polysaccharides/antigens	Protein involved in the production of the high molecular weight form of EPSI		Q92U07
SMb21518		CDS			-2.15865	0.000512143	N.III	VI.C Hypothetical/Global similarity	Conserved hypothetical protein,signal peptide		Q92TZ5
SMb21549	thtR	CDS	1.53891	0.000512143			N.II	IV.G.4 detoxification	Putative exported sulfurtransferase,Rhodanese protein	K01011	Q92UU7
SMb21552	aacC4	CDS	1.4083	0.00354496			N.II	IV.G.2 drug/analog sensitivity and resistance	Putative aminoglycoside 6'-N-acetyltransferase,similar to amikacin resistance protein	K00663	Q92UU4
SMb21561		CDS			1.08025	0.0091608	N.III	VI.A Not classified regulator	Putative two-component response regulator		Q92UT6
SMb21566	groEL5	CDS	1.35412	0.00137247			N.II	IV.B Chaperoning	Putative heat shock protein GroEL	K04077
SMb21575		CDS			-1.39323	0.00213505	N.III	IV.D Transport of small molecules	Putative major facilitator superfamily transporter		Q92US5
SMb21581		CDS			-1.63533	0.000512143	N.III	III.A.1 surface polysaccharides/antigens	Putative glycosyltransferase,similar to smb2117 protein	K12995	Q92US1
SMb21600	ampC	CDS	-1.30406	0.000512143			N.II	IV.G.2 drug/analog sensitivity and resistance	Putative exported beta-lactamase	K01467	Q92UQ4
SMb21630		CDS	-1.5486	0.000512143			N.II	VI.C Hypothetical/Global homology	Conserved hypothetical protein		Q92TH0
SMb21631	nspC	CDS	-1.7418	0.000512143			N.II	I.F Central intermediary metabolism	Putative carboxynorspermidine decarboxylase	K13747	Q92TG9
SMb21652	lacE	CDS	-1.35793	0.000512143			N.II	IV.D.3 carbohydrates, organic acids, alcohols	Lactose ABC transporter,periplasmic solute-binding protein	K10188	Q926I0
SMb21690	exoW	CDS	1.91264	0.00213505			N.II	III.A.1 surface polysaccharides/antigens	Glucosyltransferase	K16562
SMb21691		CDS	3.63482	0.000512143			N.II	I Small Molecule Metabolism	Alkanesulfonate monooxygenase	K24116	Q92TM7
SMb23074		ncRNA			1.56651	0.000512143	N.III
SMb23147		ncRNA			1.44545	0.00320928	N.III
SMc00033		CDS	1.15805	0.00320928			N.II	VI.A Not classified regulator	Diguanylate cyclase/phosphodiesterase		Q92RD6
SMc00041		CDS	-1.29596	0.000512143			N.II	VI.C Hypothetical/Global homology	Conserved hypothetical protein		Q92KJ1
SMc00048		CDS			-1.21659	0.00285916	N.III	VI.C Hypothetical/Global similarity	Conserved hypothetical protein	K14061	Q92RA8
SMc00058	mucR	CDS			1.42969	0.0009592	N.III	III.A.1 surface polysaccharides/antigens	Transcriptional regulator of exopolysaccharide biosynthesis		P55323
SMc00062		CDS			-3.02437	0.000512143	N.III	VI.B Hypothetical/Partial homology	Hypothetical protein		Q92KI7
SMc00063		CDS			-3.1896	0.000512143	N.III	VI.C Hypothetical/Global similarity	Conserved hypothetical protein		Q92KI6
SMc00065	feuN	CDS			-1.58059	0.000512143	N.III	VI.A Not classified regulator	Modulator of the two component system FeuPQ		Q92R92
SMc00079		CDS			0.99081	0.00832418	N.III	I Small Molecule Metabolism	HAD-superfamily hydrolase		Q92RF3
SMc00086	cycG	CDS	1.85575	0.000512143			N.II	I.G.1 electron transport	Putative diheme cytochrome C-type signal peptide protein		Q92RB7
SMc00088		CDS			1.51252	0.00137247	N.III	VI.C Hypothetical/Global homology	Hypothetical/unknown transmembrane protein		Q92RE1
SMc00092	cysH	CDS	1.44457	0.0009592			N.II	I.F.14 amino acids	Phosphoadenosine phosphosulfate reductase	K00390	P56891
SMc00108		CDS			2.15349	0.000512143	N.III	I Small Molecule Metabolism	Putative acetyltransferase		Q92RB6
SMc00141		CDS	1.42792	0.0009592	-3.03215	0.000512143	N.I	VI.B Hypothetical/Partial homology	Hypothetical protein		Q92K87
SMc00174		CDS			1.05055	0.00661481	N.III	IV.D Transport of small molecules	Probable ABC transporter	K02066	Q92PD5
SMc00175		CDS			1.08642	0.00452512	N.III	IV.D Transport of small molecules	Putative ABC transporter ATP-binding protein	K02065	Q92PD6
SMc00176		CDS			1.24263	0.0009592	N.III	VI.C Hypothetical/Global similarity	Conserved hypothetical protein	K02067	Q92PD7
SMc00180	hemF	CDS	-1.0586	0.0069235			N.II	I.B.4 heme, porphyrin	Probable coproporphyrinogen III oxidase,aerobic protein	K00228	Q92PD8
SMc00198		CDS	2.1326	0.00661481	-2.17549	0.000512143	N.I	VI.D Unknown	Hypothetical/unknown protein		Q92PB0
SMc00227		CDS			1.28022	0.00720208	N.III	VI.C Hypothetical/Global similarity	Conserved hypothetical protein	K09159	Q92PS8
SMc00251		CDS			1.66633	0.000512143	N.III	VI.C Hypothetical/Global homology	Conserved hypothetical protein		Q92KC3
SMc00252		CDS			-3.65773	0.000512143	N.III	VI.C Hypothetical/Global similarity	Conserved hypothetical protein,signal peptide		Q92KC2
SMc00253		CDS			-3.04573	0.00176271	N.III	VI.C Hypothetical/Global similarity	Hypothetical signal peptide protein		Q92PQ6
SMc00280		CDS			1.61912	0.00387636	N.III	VI.C Hypothetical/Global homology	Conserved hypothetical protein		Q92PN0
SMc00286		CDS	1.69496	0.00420562	-3.28372	0.000512143	N.I	VI.B Hypothetical/Partial homology	Calcium-binding protein		Q92KB8
SMc00294	aatC	CDS			1.15691	0.00387636	N.III	I.F.14 amino acids	Probable aminotransferase	K14261	O87320
SMc00300	sthA	CDS			1.38714	0.00602255	N.III	I.B.9 pyridine nucleotide	Probable soluble pyridine nucleotide transhydrogenase	K00322	Q92PL5
SMc00320	rbfA	CDS			1.79819	0.00285916	N.III	II.B Macromolecule synthesis, modification	Probable ribosome-binding factor A,rRNA processing protein	K02834	Q92SW3
SMc00321	truB	CDS			1.28011	0.00420562	N.III	II.D.1 amino acyl tRNA synthesis; tRNA modification	Probable tRNA pseudouridine synthase B	K03177	Q92SW2
SMc00338		CDS			-1.15063	0.00482954	N.III	VI.C Hypothetical/Global homology	Conserved hypothetical protein		Q92SV2
SMc00342	rnd2	CDS			1.40214	0.00602255	N.III	II.A.2 degradation of RNA	Putative ribonuclease D	K03684	Q92SU9
SMc00357	efp	CDS			1.53078	0.00176271	N.III	II.B.7 proteins and peptides - translation and modification	Probable elongation factor P	K02356	Q92ST6
SMc00364	rplT	CDS			1.21387	0.00213505	N.III	III.C.2 ribosomal proteins - synthesis, modification	Probable 5S ribosomal protein L2	K02887	Q92ST1
SMc00371		CDS			-1.86297	0.000512143	N.III	VI.C Hypothetical/Global similarity	Conserved hypothetical protein		Q92SS4
SMc00394	guaA	CDS			1.13135	0.00970149	N.III	I.D.2 purine ribonucleotide biosynthesis	Probable GMP synthase glutamine-hydrolyzing protein	K01951	Q92SQ3
SMc00404		CDS	2.07441	0.00176271			N.II	VI.B Hypothetical/Partial homology	Hypothetical protein	K03642	Q92KS1
SMc00456		CDS			1.32436	0.00387636	N.III	VI.C Hypothetical/Global similarity	Conserved hypothetical protein,signal peptide		Q52968
SMc00458	feuP	CDS			-2.14075	0.000512143	N.III	IV.D.5 incorporation metal ions	Response regulators consisting of a CheY-like receiver domain and a winged-helix DNA-binding domain	K02483	Q92R91
SMc00494		CDS			1.13379	0.00137247	N.III	VI.C Hypothetical/Global similarity	Conserved hypothetical protein	K23264	Q92PI2
SMc00501		CDS			-1.79403	0.00354496	N.III	VI.C Hypothetical/Global similarity	Conserved hypothetical protein		Q92PI7
SMc00508	purB	CDS			1.18389	0.00213505	N.III	I.D.2 purine ribonucleotide biosynthesis	Putative adenylosuccinate lyase	K01756	Q92PJ3
SMc00561	dnaB	CDS			1.34614	0.000512143	N.III	II.B.8 DNA - replication, repair, restr./modif.	Probable replicative DNA helicase	K02314	Q92R03
SMc00573	acpP	CDS			1.28011	0.000512143	N.III	I.C Fatty acid biosynthesis	Acyl carrier protein	K02078	P19372
SMc00604	ropB1	CDS			-1.80608	0.00137247	N.III	III.B.2 membrane, outer	Probable outer membrane protein	K16079	Q92QX0
SMc00640	serC	CDS			1.10054	0.00777209	N.III	I.A.10 serine	Putative phosphoserine aminotransferase	K00831	Q92MA2
SMc00641	serA	CDS			2.22508	0.000512143	N.III	I.A.10 serine	Putative D-3-phosphoglycerate dehydrogenase	K00058	Q92MA3
SMc00672	hisX,hutX	CDS	1.34482	0.000512143			N.II	IV.D.2 amino acids, amines, peptides	Histidine ABC transporter,periplasmic solute-binding protein	K02002	Q92MC6
SMc00690	accA	CDS			0.977656	0.00970149	N.III	I.C Fatty acid biosynthesis	Probable acetyl-coenzyme A carboxylase carboxyl transferase subunit alpha protein	K01962	Q92ME2
SMc00704	rpmB	CDS			1.24819	0.0009592	N.III	III.C.2 ribosomal proteins - synthesis, modification	Probable 5S ribosomal protein L28	K02902	Q92MF4
SMc00718		CDS			1.37914	0.000512143	N.III	VI.C Hypothetical/Global homology	Hypothetical transmembrane protein		Q92MG6
SMc00766		CDS			-1.85797	0.000512143	N.III	VI.A Not classified regulator	Putative transcription regulator		Q92RX7
SMc00767		CDS			-3.69521	0.000512143	N.III	VI.B Hypothetical/Partial homology	Hypothetical protein		Q92KM8
SMc00768	aceA	CDS			-3.2222	0.000512143	N.III	I.F.17 glyoxylate bypass	Probable isocitrate lyase	K01637	Q92RX6
SMc00777		CDS	-1.81747	0.000512143			N.II	VI.C Hypothetical/Global homology	Conserved hypothetical protein		Q92RW8
SMc00798		CDS			-1.4404	0.00482954	N.III	VI.C Hypothetical/Global similarity	Conserved hypothetical protein		Q92RU8
SMc00800		CDS			-3.09119	0.000512143	N.III	VI.B Hypothetical/Partial homology	Hypothetical transmembrane protein		Q92KM6
SMc00808	chrA	CDS			-1.22691	0.00354496	N.III	IV.D.1 anions	Putative chromate transport protein	K07240	Q92RU1
SMc00809		CDS	2.00782	0.00250247	-4.02449	0.000512143	N.I	VI.C Hypothetical/Global homology	Putative signal peptide protein		Q92RU0
SMc00814		CDS			-1.98433	0.000512143	N.III	VI.C Hypothetical/Global homology	Hypothetical signal peptide protein		Q92RT6
SMc00828		CDS			1.11723	0.00176271	N.III	VI.C Hypothetical/Global similarity	Conserved hypothetical protein		Q92RS6
SMc00830		CDS	-1.48094	0.000512143			N.II	VI.B Hypothetical/Partial homology	Hypothetical transmembrane protein		Q92KM0
SMc00870	atpE	CDS			1.21868	0.00387636	N.III	I.E.2 ATP-proton motive force interconversion	Probable ATP synthase subunit C transmembrane protein	K02110	Q92RM7
SMc00885		CDS			-2.75824	0.000512143	N.III	VI.B Hypothetical/Partial homology	Hypothetical transmembrane signal peptide protein		Q92KL1
SMc00895		CDS			1.09386	0.00944057	N.III	VI.C Hypothetical/Global similarity	Conserved hypothetical protein		Q92RQ0
SMc00908	ileS	CDS			1.11395	0.00482954	N.III	II.D.1 amino acyl tRNA synthesis; tRNA modification	Probable isoleucyl-tRNA synthetase	K01870	Q92RR0
SMc00909	ribF	CDS			1.04135	0.00573901	N.III	I.B.7 riboflavin	Probable riboflavin biosynthesis protein RibF includes: riboflavin kinase and FMN adenylyltransferase	K11753	Q92RR1
SMc00912	groES1	CDS			1.73728	0.00250247	N.III	IV.B Chaperoning	1 KD chaperonin A	K04078	P35473
SMc00921		CDS			-1.63189	0.00544021	N.III	VI.B Hypothetical/Partial homology	Hypothetical signal peptide protein		Q92KL7
SMc00933		CDS			1.85229	0.0009592	N.III	VI.C Hypothetical/Global similarity	Conserved hypothetical protein		Q92RP5
SMc00942		CDS			0.946454	0.00970149	N.III	VI.C Hypothetical/Global homology	Conserved hypothetical protein		Q92PU4
SMc00955		CDS			0.977539	0.0091608	N.III	VI.C Hypothetical/Global similarity	Conserved hypothetical protein		Q92PT3
SMc00977		CDS	-1.33302	0.000512143	-1.17784	0.000512143	N.I	I.I.1 fatty acid	Putative acyl-CoA dehydrogenase		Q92RJ6
SMc00978		CDS			1.08199	0.00420562	N.III	VI.C Hypothetical/Global similarity	Hypothetical transmembrane protein	K16074	Q92RJ7
SMc01006		CDS			1.53026	0.000512143	N.III	VI.C Hypothetical/Global homology	Conserved hypothetical protein		Q92QB3
SMc01018	parE	CDS			1.15291	0.00354496	N.III	II.B.8 DNA - replication, repair, restr./modif.	Probable topoisomerase IV subunit B	K02622	Q92QA5
SMc01028	eno	CDS			1.17264	0.00720208	N.III	I.H.8 glycolysis	Probable enolase	K01689	Q92Q98
SMc01029		CDS			1.144	0.00176271	N.III	VI.C Hypothetical/Global similarity	Conserved hypothetical protein		Q92Q97
SMc01030	pdhA	CDS	-1.23803	0.00420562			N.II	I.H.7 pyruvate dehydrogenase	Pyruvate dehydrogenase E1 component alpha subunit	K00161	Q9R9N5
SMc01032	pdhC	CDS			1.18619	0.00285916	N.III	I.H.7 pyruvate dehydrogenase	Dihydrolipoyllysine-residue acetyltransferase component of pyruvate dehydrogenase complex	K00627	Q9R9N3
SMc01053	cysG	CDS	1.38426	0.0009592			N.II	I.B.4 heme, porphyrin	Probable siroheme synthase	K02302	Q92Q80
SMc01090	deaD	CDS			1.07127	0.00513758	N.III	II.B.6 RNA synthesis, modification , DNA transcription	Putative ATP-dependent RNA helicase	K05592	Q92SG6
SMc01101	def1	CDS			1.18666	0.00176271	N.III	II.B.7 proteins and peptides - translation and modification	Probable peptide deformylase	K01462	Q92SH6
SMc01112	tlyC	CDS			1.95015	0.000512143	N.III	VI.C Hypothetical/Global homology	CBS domain-containing protein		Q92KR5
SMc01113		CDS			1.29007	0.000512143	N.III	VI.C Hypothetical/Global similarity	Conserved hypothetical protein	K07042	Q92SI5
SMc01114	phoH	CDS			1.38382	0.00213505	N.III	IV.F Adaptation	Putative phosphate starvation-inducible protein PhoH,predicted ATPase	K06217	Q92SI6
SMc01116	olsA	CDS			1.25006	0.00320928	N.III	II.B.1 phospholipids	Acyltransferase	K22617	Q7APG1
SMc01120		CDS			1.02439	0.00632638	N.III	VI.B Hypothetical/Partial homology	Hypothetical protein		Q92KR6
SMc01127	olsB	CDS			2.09399	0.000512143	N.III	I.C Fatty acid biosynthesis	Protein required for first step of ornithine-containing lipid biosynthesis (N-acylation of ornithine forming lyso-ornithine lipid)	K22310	Q92SJ1
SMc01145		CDS			1.14647	0.00354496	N.III	VI.C Hypothetical/Global homology	Putative glyoxalase family protein		Q92SK3
SMc01146		CDS			1.17081	0.00354496	N.III	I.F.1 salvage of nucleosides and nucleotides	Nucleoside-triphosphatase	K02428	Q92SK4
SMc01147		CDS			1.51511	0.000512143	N.III	I.B.4 heme, porphyrin	Putative oxygen-independent coproporphyrinogen III oxidase		Q92SK5
SMc01152	rpsT	CDS			1.17627	0.00995897	N.III	III.C.2 ribosomal proteins - synthesis, modification	3S ribosomal protein S2	K02968	P48948
SMc01159		CDS	-1.45904	0.00544021			N.II	I Small Molecule Metabolism	Putative FAD-dependent pyridine nucleotide-disulphide oxidoreductase		Q92SL1
SMc01175		CDS			-1.46877	0.000512143	N.III	I Small Molecule Metabolism	Probable oxidoreductase		Q92PV6
SMc01187	rlpA	CDS	1.08572	0.00602255			N.II	III.B.2 membrane, outer	Putative rare lipoprotein A precursor	K03642	Q926D0
SMc01207	queA	CDS			1.13153	0.00176271	N.III	II.D.1 amino acyl tRNA synthesis; tRNA modification	Probable S-adenosylmethionine:tRNA ribosyltransferase-isomerase(queuosine biosynthesis protein QueA)	K07568	Q92PY5
SMc01216		CDS			-2.2986	0.000512143	N.III	VI.C Hypothetical/Global homology	Conserved hypothetical protein		Q92KD0
SMc01217		CDS			-1.58472	0.000512143	N.III	IV.D Transport of small molecules	MFS-type transport protein		Q92PZ5
SMc01239		CDS			1.34397	0.00213505	N.III	VI.C Hypothetical/Global homology	Hypothetical/unknown transmembrane protein		Q92Q07
SMc01242		CDS	-3.34564	0.000512143			N.II	VI.C Hypothetical/Global similarity	Conserved hypothetical signal peptide protein	K09796	Q92KD3
SMc01261		CDS			1.37005	0.000512143	N.III	IV.D Transport of small molecules	Putative transporter transmembrane protein	K06213	Q92QC9
SMc01270	adhC1	CDS			1.43133	0.00250247	N.III	I.H Energy metabolism, carbon	Probable alcohol dehydrogenase class III + glutathione-dependent formaldehyde dehydrogenase	K00121	Q92QD7
SMc01281		CDS			-2.19029	0.000512143	N.III	VI.C Hypothetical/Global similarity	Conserved hypothetical protein	K07147	Q92QE7
SMc01286	rpsK	CDS			1.15321	0.00420562	N.III	III.C.2 ribosomal proteins - synthesis, modification	Probable 3S ribosomal protein S11	K02948	Q925W7
SMc01287	rpsM	CDS			1.56643	0.000512143	N.III	III.C.2 ribosomal proteins - synthesis, modification	Probable 3S ribosomal protein S13	K02952	Q925X7
SMc01292	rpsE	CDS			1.35122	0.000512143	N.III	III.C.2 ribosomal proteins - synthesis, modification	Probable 3S ribosomal protein S5	K02988	Q92QF3
SMc01293	rplR	CDS			1.24374	0.000512143	N.III	III.C.2 ribosomal proteins - synthesis, modification	Probable 5S ribosomal protein L18	K02881	Q92QF4
SMc01296	rpsN	CDS			1.50727	0.000512143	N.III	III.C.2 ribosomal proteins - synthesis, modification	Probable 3S ribosomal protein S14	K02954	Q92QF7
SMc01306	rplB	CDS			1.24754	0.000512143	N.III	III.C.2 ribosomal proteins - synthesis, modification	Probable 5S ribosomal protein L2	K02886	Q92QG7
SMc01309	rplC	CDS			0.964594	0.00832418	N.III	III.C.2 ribosomal proteins - synthesis, modification	Probable 5S ribosomal protein L3	K02906	Q92QH0
SMc01314	rpsL	CDS			1.53716	0.000512143	N.III	III.C.2 ribosomal proteins - synthesis, modification	Probable 3S ribosomal protein S12	K02950	Q92QH4
SMc01319	rplJ	CDS			1.20167	0.00213505	N.III	III.C.2 ribosomal proteins - synthesis, modification	Probable 5S ribosomal protein L1 (L8)	K02864	Q92QH9
SMc01321	rplK	CDS			1.01246	0.00944057	N.III	III.C.2 ribosomal proteins - synthesis, modification	Probable 5S ribosomal protein L11	K02867	Q92QI1
SMc01322	nusG	CDS			0.988752	0.00889017	N.III	II.B.6 RNA synthesis, modification , DNA transcription	Probable transcription antitermination protein	K02601	Q92QI2
SMc01323	secE	CDS			1.68551	0.000512143	N.III	IV.E.2 protein, peptide secretion	Putative preprotein translocase SecE subunit transmembrane	K03073	Q92QI3
SMc01324		CDS			1.0477	0.0069235	N.III	I Small Molecule Metabolism	Sugar epimerase		Q92QI4
SMc01325		CDS			1.04534	0.00970149	N.III	VI.C Hypothetical/Global homology	Hypothetical/unknown protein		Q92QI5
SMc01326	tufB	CDS			1.16576	0.00285916	N.III	II.B.7 proteins and peptides - translation and modification	Probable elongation factor TU protein	K02358
SMc01366		CDS	-1.53358	0.00176271			N.II	VI.C Hypothetical/Global homology	Conserved hypothetical protein		Q92QM1
SMc01369	rpmG	CDS			1.44832	0.000512143	N.III	III.C.2 ribosomal proteins - synthesis, modification	Probable 5S ribosomal protein L33	K02913	Q92QM4
SMc01379		tRNA			1.36859	0.00513758	N.III	tRNA	gly_TCC	K14225
SMc01467		CDS			-4.06014	0.000512143	N.III	VI.C Hypothetical/Global similarity	Conserved hypothetical protein,signal peptide		Q92K41
SMc01471	senC	CDS	-1.44828	0.000512143			N.II	I.H.3 aerobic respiration	Putative electron transport protein SCO1/SenC,cytochrome C oxidase assembly factor	K07152	Q92NN6
SMc01488		CDS			1.70746	0.00832418	N.III	VI.C Hypothetical/Global homology	Hypothetical transmembrane protein		Q92NT8
SMc01497		CDS	-1.1671	0.00720208			N.II	IV.D.3 carbohydrates, organic acids, alcohols	Putative C6 polyol ABC transporter,permease component	K10228	Q92N03
SMc01498		CDS	-1.3179	0.000512143			N.II	IV.D.3 carbohydrates, organic acids, alcohols	Putative C6 polyol ABC transporter,permease component	K10229	Q92N04
SMc01503		CDS	-1.12258	0.00832418			N.II	I.I.4 carbon compounds	Carbohydrate kinase	K00853	Q92N09
SMc01504	rsiB1	CDS			-1.06079	0.00720208	N.III	II.B.6 RNA synthesis, modification , DNA transcription	Anti-anti-sigma factor		Q92N10
SMc01506	rpoE2	CDS			-1.20722	0.00250247	N.III	II.B.6 RNA synthesis, modification , DNA transcription	RNA polymerase sigma-E factor (Sigma-24).	K03088	Q92N11
SMc01509		CDS			-1.42704	0.0009592	N.III	VI.C Hypothetical/Global homology	Hypothetical transmembrane protein		Q92N12
SMc01512	hmuT	CDS	2.42748	0.000512143			N.II	IV.D Transport of small molecules	Putative hemin binding periplasmic transmembrane protein	K25132	Q92N15
SMc01513	hmuS	CDS	2.24436	0.000512143			N.II	IV.D Transport of small molecules	Putative hemin transport protein	K07225	Q92N16
SMc01514		CDS	1.64296	0.00861167			N.II	VI.C Hypothetical/Global homology	Conserved hypothetical protein		Q92N17
SMc01515		CDS	1.89298	0.000512143			N.II	VI.C Hypothetical/Global homology	Hypothetical protein signal peptide	K03832	Q92N18
SMc01517		CDS	2.86867	0.00387636			N.II	VI.C Hypothetical/Global similarity	Conserved hypothetical protein		Q92N20
SMc01519		CDS	-1.39642	0.00320928			N.II	VI.C Hypothetical/Global homology	Hypothetical transmembrane protein		Q92N22
SMc01520		CDS	-1.7501	0.000512143			N.II	VI.C Hypothetical/Global homology	Conserved hypothetical protein	K06886	Q7APC3
SMc01551		CDS			1.32533	0.0009592	N.III	I Small Molecule Metabolism	Putative membrane bound O-acyl transferase	K19294	Q92NB0
SMc01557		CDS			-3.2724	0.000512143	N.III	VI.C Hypothetical/Global homology	Hypothetical signal peptide protein		Q92NA5
SMc01559		CDS			-1.13008	0.00777209	N.III	VI.C Hypothetical/Global similarity	Conserved hypothetical protein		Q92NA3
SMc01581		CDS			-2.69595	0.00285916	N.III	VI.C Hypothetical/Global similarity	Hypothetical transmembrane protein		Q92N89
SMc01583		CDS			-1.83943	0.000512143	N.III	VI.C Hypothetical/Global homology	Conserved hypothetical protein	K21430	Q92N88
SMc01590		CDS			-2.2871	0.000512143	N.III	VI.B Hypothetical/Partial homology	Hypothetical protein		Q92K24
SMc01600		CDS	-1.48914	0.00777209			N.II	VI.C Hypothetical/Global homology	Conserved hypothetical protein		Q92NI7
SMc01605		CDS			1.40602	0.00176271	N.III	IV.D Transport of small molecules	Putative periplasmic binding ABC transporter	K02055	Q92NI5
SMc01608		CDS			1.43049	0.000512143	N.III	IV.D Transport of small molecules	Putative ATP-binding ABC transporter	K02052	Q92NI2
SMc01621	fucA1	CDS	-1.17048	0.00995897			N.II	I.I.4 carbon compounds	Putative L-fuculose phosphate aldolase	K01628	Q92NH2
SMc01626		CDS	-1.49332	0.00944057			N.II	IV.D Transport of small molecules	Putative polyol ABC transporter,permease component	K02026	Q92NG7
SMc01628		CDS	-1.05487	0.0069235			N.II	IV.D Transport of small molecules	Putative polyol ABC transporter,periplasmic solute-binding component	K02027	Q92NG5
SMc01647		CDS	1.11708	0.00632638			N.II	IV.D Transport of small molecules	Probable ABC transporter	K02035	Q92NE7
SMc01652		CDS	-1.51065	0.0009592			N.II	IV.D.2 amino acids, amines, peptides	Putative putrescine and agmatine ABC transporter,periplasmic solute-binding component	K02055	Q92NE3
SMc01657	fhuA2	CDS	2.8892	0.000512143			N.II	IV.E Transport of large molecules	Putative ferrichrome-iron receptor precursor protein	K02014	Q926C6
SMc01658		CDS	2.43626	0.000512143			N.II	IV.E Transport of large molecules	Putative ferric iron reductase	K13255	Q92ND8
SMc01659		CDS	1.99424	0.000512143			N.II	IV.D Transport of small molecules	Putative ABC transporter,periplasmic component	K02016	Q92ND7
SMc01712	lldD	CDS			1.20646	0.000512143	N.III	I.H.3 aerobic respiration	Putative L-lactate dehydrogenase (cytochrome) protein	K00101	Q92SE6
SMc01718		CDS			-1.32269	0.000512143	N.III	VI.C Hypothetical/Global similarity	conserved hypothetical transmembrane protein		Q92KR0
SMc01723		CDS			1.22592	0.00354496	N.III	VI.C Hypothetical/Global homology	Hypothetical transmembrane protein		Q92SF7
SMc01725		CDS			1.36915	0.000512143	N.III	VI.C Hypothetical/Global similarity	Conserved hypothetical transmembrane protein		Q92SF9
SMc01740		CDS			1.01348	0.00832418	N.III	I Small Molecule Metabolism	Putative (S)-2-hydroxy-acid oxidase	K00101	Q92NB8
SMc01758	groEL4	CDS			-1.35174	0.000512143	N.III	IV.B Chaperoning	6 KD chaperonin B (GroEL) protein		P35470
SMc01766	hemB	CDS	-1.43668	0.000512143			N.II	I.B.4 heme, porphyrin	Probable delta-aminolevulinic acid dehydratase	K01698	Q92QU9
SMc01770	glyA1	CDS			1.25247	0.00250247	N.III	I.A.11 glycine	Probable serine hydroxymethyltransferase	K00600	Q92QU6
SMc01771	nrdR	CDS			1.20732	0.000512143	N.III	VI.A Not classified regulator	Putative transcriptional repressor	K07738	P58259
SMc01774		CDS			-4.30504	0.00285916	N.III	VI.C Hypothetical/Global homology	Hypothetical protein signal peptide		Q92QU3
SMc01782		CDS			0.948295	0.00995897	N.III	VI.B Hypothetical/Partial homology	Hypothetical protein	K17662	Q92KF4
SMc01793		CDS			1.49671	0.000512143	N.III	III.A.1 surface polysaccharides/antigens	Putative glycosyltransferase		Q92QS5
SMc01794		CDS			1.01914	0.00720208	N.III	III.A.1 surface polysaccharides/antigens	Putative polysaccharide export system periplasmic transmembrane protein	K01991	Q92QS4
SMc01800	ctaA	CDS	-1.59873	0.00995897			N.II	I.B.4 heme, porphyrin	Putative heme A synthase	K02259	Q92QR8
SMc01815		CDS	2.5234	0.000512143			N.II	I Small Molecule Metabolism	Dihydropyrimidine dehydrogenase family protein	K17723	Q92MZ9
SMc01820		CDS	1.25565	0.00285916			N.II	I.F Central intermediary metabolism	Putative N-carbamyl-L-amino acid amidohydrolase	K06016	Q92MZ4
SMc01821	dht	CDS	2.90441	0.000512143			N.II	I.F Central intermediary metabolism	Putative D-hydantoinase (dihydropyrimidinase)	K01464	Q92MZ3
SMc01822		CDS	1.44841	0.000512143			N.II	VI.C Hypothetical/Global homology	Conserved hypothetical protein		Q92MZ2
SMc01823		CDS	1.63957	0.00320928			N.II	IV.D.6 nucleosides, purines pyrimidines	Putative uracil and uridine ABC transporter,ATP-binding component	K02049	Q92MZ1
SMc01825		CDS	1.55273	0.00420562			N.II	IV.D.6 nucleosides, purines pyrimidines	Putative uracil and uridine ABC transporter,permease component	K02050	Q92MY9
SMc01826		CDS	1.95181	0.00176271			N.II	IV.D.6 nucleosides, purines pyrimidines	Putative uracil and uridine ABC transporter,permease component	K02050	Q92MY8
SMc01827		CDS	2.35424	0.000512143			N.II	IV.D.6 nucleosides, purines pyrimidines	Putative uracil and uridine ABC transporter,periplasmic solute-binding protein	K02051	Q92K04
SMc01855		CDS	2.51283	0.000512143	-1.75044	0.0009592	N.I	III.B Cell envelope	Putative membrane-bound lytic transglycosylase,signal peptide		Q92NL1
SMc01880	panC	CDS	-1.27305	0.0009592			N.II	I.B.11 pantothenate	Probable pantoate--beta-alanine ligase	K01918	Q92NN0
SMc01881	panB	CDS	-1.29093	0.00213505			N.II	I.B.11 pantothenate	Probable 3-methyl-2-oxobutanoate hydroxymethyltransferase	K00606	Q92NN1
SMc01906	hupB	CDS			1.28696	0.00213505	N.III	II.C.1 basic proteins - synthesis, modification	DNA-binding protein HU	K03530	P02344
SMc01908		CDS			1.17863	0.00137247	N.III	VI.A Not classified regulator	Transcription regulator MarR family		Q92QQ1
SMc01922	nuoI	CDS			1.19935	0.00250247	N.III	I.H.3 aerobic respiration	Probable NADH-ubiquinone oxidoreductase chain I	K00338	Q92QP4
SMc01924	nuoK1	CDS			0.968336	0.00944057	N.III	I.H.3 aerobic respiration	Probable NADH dehydrogenase I chain K transmembrane protein	K00340	Q92QP2
SMc01946	livK	CDS	2.32502	0.000512143			N.II	IV.D.2 amino acids, amines, peptides	Putative leucine-specific binding protein precursor	K01999	Q926C5
SMc01947		CDS	1.56247	0.000512143			N.II	VI.C Hypothetical/Global similarity	Conserved hypothetical transmembrane protein		Q92MX5
SMc01951	livH	CDS	1.22813	0.00213505			N.II	IV.D.2 amino acids, amines, peptides	Probable high-affinity branched-chain amino acid transport permease ABC transporter	K01997	Q92MX1
SMc01981		CDS	-1.13045	0.00832418			N.II	I.G.1 electron transport	Putative cytochrome C transmembrane protein	K08738	Q92MU4
SMc02021		CDS			-1.45313	0.00632638	N.III	IV.D.3 carbohydrates, organic acids, alcohols	Putative organic acid ABC transporter,periplasmic solute-binding component	K10439	Q92MS8
SMc02033		CDS			-1.6671	0.00213505	N.III	IV.D Transport of small molecules	Sugar-binding periplasmic protein precursor.	K10439	Q92MR7
SMc02051		CDS	-1.50043	0.00749637	1.90315	0.000512143	N.I	VI.C Hypothetical/Global homology	Conserved hypothetical protein		Q92Q13
SMc02052		CDS	-1.94673	0.000512143	2.96944	0.000512143	N.I	VI.C Hypothetical/Global homology	Conserved hypothetical protein		Q92Q14
SMc02058		CDS			1.38132	0.000512143	N.III	IV.E.2 protein, peptide secretion	Probable YajC protein	K03210	Q92Q20
SMc02070	scpA	CDS			1.30906	0.00970149	N.III	IV.A Cell division	Putative segregation and condensation protein A	K05896	Q92Q28
SMc02073	argS	CDS			1.03367	0.00482954	N.III	II.D.1 amino acyl tRNA synthesis; tRNA modification	Probable arginyl-tRNA synthetase (arginine--tRNA ligase)	K01887	Q92Q31
SMc02099	pyrH	CDS			0.970717	0.00861167	N.III	I.F.9 nucleotide interconversions	Probable uridylate kinase	K09903	Q92Q53
SMc02100	tsf	CDS			1.37085	0.000512143	N.III	II.B.7 proteins and peptides - translation and modification	Probable elongation factor TS (EF-TS) protein	K02357	Q92Q54
SMc02111		CDS	-1.26868	0.0009592			N.II	VI.C Hypothetical/Global homology	Conserved hypothetical protein		Q92Q64
SMc02112		CDS			1.1225	0.00320928	N.III	VI.C Hypothetical/Global homology	Hypothetical unknown protein		Q92Q65
SMc02147	phoR	CDS			1.81178	0.000512143	N.III	I.E.1 global regulatory functions	Probable phosphate regulon sensor histidine kinase transmembrane protein	K07636	Q92SA5
SMc02150		CDS	-1.0661	0.00176271			N.II	VI.C Hypothetical/Global homology	Conserved hypothetical protein	K00459	Q92SA7
SMc02160		CDS			1.16007	0.00250247	N.III	IV.D Transport of small molecules	Probable permease		Q92SC2
SMc02162	fadD	CDS	-1.73208	0.000512143			N.II	I.I.1 fatty acid	Long-chain-fatty-acid-CoA ligase	K01897	Q7APF7
SMc02164	frk	CDS	-1.11899	0.00452512			N.II	I.I.4 carbon compounds	Probable fructokinase	K00847	Q92SC5
SMc02165	pyrE	CDS	-1.10605	0.00250247			N.II	I.D.1 pyrimidine ribonucleotide biosynthesis	Probable orotate phosphoribosyltransferase	K00762	Q92SC6
SMc02229		CDS	-1.51149	0.000512143			N.II	I.I.1 fatty acid	Putative acyl-CoA dehydrogenase	K00249	Q92S86
SMc02255	qxtA	CDS	-2.42969	0.000512143			N.II	I.G.1 electron transport	Putative quinol oxidase subunit I transmembrane protein	K00425	Q92S67
SMc02259		CDS	1.48102	0.000512143			N.II	IV.D Transport of small molecules	Putative periplasmic binding ABC transporter	K02030	Q92S63
SMc02260		CDS			1.18029	0.00176271	N.III	IV.D.2 amino acids, amines, peptides	Putative amino-acid ABC transporter,ATP-binding protein	K02028	Q92S62
SMc02284		CDS			-1.19085	0.00544021	N.III	VI.C Hypothetical/Global homology	Hypothetical signal peptide protein		Q92S41
SMc02310	infA	CDS			1.12242	0.000512143	N.III	II.B.7 proteins and peptides - translation and modification	Probable translation initiation factor IF-1 protein	K02518	Q92S23
SMc02311	maf	CDS			1.30672	0.00573901	N.III	IV.A Cell division	Putative septum formation protein	K06287	Q92S22
SMc02320		CDS			1.12238	0.00420562	N.III	VI.C Hypothetical/Global homology	Hypothetical transmembrane protein		Q92S15
SMc02342	tkt1	CDS	1.47799	0.000512143			N.II	I.F.19 non oxidative branch, pentose pathway	Probable transketolase	K00615	Q92MP3
SMc02343		CDS	3.21918	0.000512143			N.II	IV.D Transport of small molecules	Transport protein		Q92MP2
SMc02344		CDS	3.22387	0.000512143			N.II	IV.D.2 amino acids, amines, peptides	Putative glycine-betaine and choline ABC transporter,periplasmic solute-binding component	K02051	Q92MP1
SMc02345		CDS	3.90899	0.000512143			N.II	IV.D.2 amino acids, amines, peptides	Putative glycine-betaine and choline ABC transporter,permease component	K02050	Q92MP0
SMc02346		CDS	3.62393	0.000512143			N.II	IV.D.2 amino acids, amines, peptides	Putative glycine-betaine and choline ABC transporter,ATP-binding component	K02049	Q92MN9
SMc02347	asfB	CDS	4.54864	0.0009592			N.II	I Small Molecule Metabolism	Putative ferredoxin AsfB iron-sulfur protein		Q92MN8
SMc02349	asfA	CDS	3.55145	0.000512143			N.II	I Small Molecule Metabolism	Oxidoreductase		Q92MN7
SMc02350		CDS	3.46225	0.000512143			N.II	VI.C Hypothetical/Global homology	Conserved hypothetical protein		Q92MN6
SMc02356		CDS	1.54802	0.000512143			N.II	IV.D.2 amino acids, amines, peptides	Putative branched chain amino acid binding periplasmic ABC transporter	K01999	Q92MN0
SMc02372		CDS	-1.03345	0.00632638			N.II	IV.D Transport of small molecules	Putative MFS permease		Q92R82
SMc02373		CDS			1.5806	0.000512143	N.III	VI.C Hypothetical/Global homology	Hypothetical unknown protein		Q92R81
SMc02374		CDS			2.20731	0.000512143	N.III	VI.C Hypothetical/Global homology	Hypothetical unknown protein		Q92R80
SMc02388		CDS	2.9644	0.0091608	-3.066	0.000512143	N.I	VI.B Hypothetical/Partial homology	Hypothetical unknown transmembrane protein		Q92R67
SMc02389		CDS			-2.45484	0.000512143	N.III	VI.C Hypothetical/Global homology	Hypothetical unknown transmembrane protein		Q92R66
SMc02400		CDS			1.16681	0.0069235	N.III	III.B.2 membrane, outer	Probable outer membrane protein		Q92R58
SMc02401		CDS			-2.46296	0.000512143	N.III	VI.C Hypothetical/Global homology	Hypothetical transmembrane protein		Q92R57
SMc02408	rpoZ	CDS			1.19273	0.00213505	N.III	II.B.6 RNA synthesis, modification , DNA transcription	DNA-directed RNA polymerase omega subunit	K03060	Q92R52
SMc02417		CDS	2.54006	0.000512143			N.II	IV.D.6 nucleosides, purines pyrimidines	Putative allantoin and other purine derivative ABC transporter,periplasmic solute-binding component	K02035	Q92MM0
SMc02463	sdhC	CDS			1.06554	0.00544021	N.III	I.H.6 TCA cycle	Probable succinate dehydrogenase cytochrome B-556 subunit transmembrane protein	K00241	Q92LI1
SMc02466	sdhB	CDS			1.00557	0.00805017	N.III	I.H.6 TCA cycle	Probable succinate dehydrogenase iron-sulfur protein	K00240	Q92LI4
SMc02471		CDS	-1.12367	0.00889017			N.II	IV.D.3 carbohydrates, organic acids, alcohols	Putative periplasmic binding ABC transporter	K10117	Q92LI8
SMc02480	sucC	CDS	1.39601	0.00320928			N.II	VI.A Not classified regulator	Probable succinyl-CoA synthetase beta chain	K01903	Q9EYG9
SMc02481	sucD	CDS	1.46732	0.000512143			N.II	I.H.6 TCA cycle	Probable succinyl-CoA synthetase alpha chain	K01902	Q92LJ5
SMc02482	sucA	CDS	1.73128	0.0009592			N.II	I.H.6 TCA cycle	Probable 2-oxoglutarate dehydrogenase E1 component protein	K00164	Q7APA7
SMc02483	sucB	CDS	1.43372	0.000512143			N.II	I.H.6 TCA cycle	Probable dihydrolipoamide succinyl transferase component of 2-oxoglutarate dehydrogenase complex (E2) protein	K00658	Q92LJ6
SMc02502	atpC	CDS			1.21728	0.000512143	N.III	I.E.2 ATP-proton motive force interconversion	Probable ATP synthase epsilon chain	K02114	Q92LK9
SMc02505		CDS	-1.15522	0.00137247			N.II	VI.C Hypothetical/Global homology	Conserved hypothetical transmembrane protein,signal peptide		Q92JV1
SMc02514		CDS	-1.87902	0.000512143			N.II	IV.D Transport of small molecules	Putative glycerol-3-phosphate and glycerol ABC transporter,periplasmic solute-binding component	K17321	Q92LM0
SMc02516		CDS	-1.44244	0.00452512			N.II	IV.D Transport of small molecules	Putative glycerol-3-phosphate and glycerol ABC transporter,permease component	K17323	Q92LM1
SMc02517		CDS	-1.58774	0.00420562			N.II	IV.D Transport of small molecules	Putative glycerol-3-phosphate and glycerol ABC transporter,permease component	K17322	Q92LM2
SMc02518		CDS			1.29346	0.00354496	N.III	IV.D Transport of small molecules	Putative glycerol-3-phosphate and glycerol ABC transporter,ATP-binding component	K17325	Q92LM3
SMc02562	pckA	CDS	3.07486	0.000512143			N.II	I.F.13 gluconeogenesis	Phosphoenolpyruvate carboxykinase	K01610	P43085
SMc02567	coaA	CDS			1.0735	0.00544021	N.III	I.B.11 pantothenate	Probable pantothenate kinase	K00867	Q92TB5
SMc02574	hisB	CDS			1.10705	0.00354496	N.III	I.A.4 histidine	Probable imidazoleglycerol-phosphate dehydratase	K01693	Q92TB0
SMc02584	actR	CDS	-1.32046	0.0009592			N.II	I.E.1 global regulatory functions	Two component response regulator,essential for acid-tolerance	K15012	P0C5S3
SMc02585	actS	CDS	-1.05013	0.00661481			N.II	I.E.1 global regulatory functions	Two component sensor histidine kinase,essential for acid-tolerance	K15011	Q92TA1
SMc02598	nadC	CDS			1.2001	0.00354496	N.III	I.B.9 pyridine nucleotide	Probable nicotinate-nucleotide pyrophosphorylase carboxylating protein	K00767	Q92R31
SMc02599	nadB	CDS			1.01747	0.00720208	N.III	I.B.9 pyridine nucleotide	Probable L-aspartate oxidase	K00278	Q92R32
SMc02601	nadA	CDS			1.03592	0.00137247	N.III	I.B.9 pyridine nucleotide	Probable quinolinate synthetase A	K03517	Q92R33
SMc02602		CDS	2.01969	0.00213505			N.II	VI.C Hypothetical/Global homology	Hypothetical transmembrane protein		Q92T89
SMc02655		CDS	-1.52949	0.00720208			N.II	VI.C Hypothetical/Global homology	Hypothetical transmembrane protein	K09928	Q92R50
SMc02686	prs	CDS			1.24016	0.00285916	N.III	I.D.2 purine ribonucleotide biosynthesis	Probable ribose-phosphate pyrophosphokinase	K00948	Q92N73
SMc02688		CDS	-1.74989	0.000512143			N.II	VI.C Hypothetical/Global homology	Conserved hypothetical protein	K09959	Q92N71
SMc02689		CDS	-1.70479	0.000512143			N.II	I.I.4 carbon compounds	Probable aldehyde dehydrogenase	K00138	Q92N70
SMc02692	rplY	CDS			1.16489	0.00749637	N.III	III.C.2 ribosomal proteins - synthesis, modification	Putative 5S ribosomal protein L25	K02897	Q92N68
SMc02718		CDS	1.47006	0.0009592	2.84643	0.000512143	N.I	VI.B Hypothetical/Partial homology	Hypothetical/unknown protein		Q92N49
SMc02720	clpP2	CDS			1.29962	0.00137247	N.III	II.A.4 degradation of proteins, peptides, glycopeptides	CLP protease proteolytic subunit	K01358	Q9X7L1
SMc02757		CDS			1.01788	0.00573901	N.III	VI.B Hypothetical/Partial homology	Hypothetical protein	K07102	Q92KV3
SMc02758		CDS			1.17767	0.00176271	N.III	VI.C Hypothetical/Global homology	Putative nucleotidyl transferase	K00992	Q92TC3
SMc02778	hpcH	CDS			2.41022	0.000512143	N.III	I.I.4 carbon compounds	2,4-dihydroxyhept-2-ene-1,7-dioic acid aldolase	K02510	Q92TE1
SMc02782	gyrB	CDS			1.44384	0.0009592	N.III	II.B.8 DNA - replication, repair, restr./modif.	Probable DNA gyrase subunit B	K02470	Q92TE4
SMc02794	hemE	CDS	-1.34618	0.000512143			N.II	I.B.4 heme, porphyrin	Probable uroporphyrinogen decarboxylase	K01599	Q92KV8
SMc02795		CDS	-1.17633	0.0009592			N.II	VI.C Hypothetical/Global homology	Hypothetical transmembrane protein	K08973	Q92KV9
SMc02797	mnmE	CDS			1.06483	0.00720208	N.III	II.D.1 amino acyl tRNA synthesis; tRNA modification	Probable tRNA modification GTPase	K03650	Q92KW1
SMc02835	glk	CDS	-0.986075	0.00832418			N.II	I.H.8 glycolysis	Probable glucokinase transmembrane protein	K00845	Q92T27
SMc02855		CDS	1.35458	0.000512143	2.26661	0.000512143	N.I	VI.C Hypothetical/Global homology	aR14 Hypothetical transmembrane protein		Q92T09
SMc02869		CDS	-1.14503	0.00285916			N.II	IV.D.3 carbohydrates, organic acids, alcohols	Putative ATP-binding ABC transporter	K10111	Q92T01
SMc02897		CDS	-1.31426	0.00176271			N.II	I.G.1 electron transport	Putative cytochrome C transmembrane protein	K08738	Q92SX7
SMc02900		CDS	-2.24449	0.000512143			N.II	VI.C Hypothetical/Global homology	Conserved hypothetical protein		Q92SX4
SMc02901		CDS	-2.5812	0.000512143			N.II	VI.B Hypothetical/Partial homology	Hypothetical protein		Q92KT5
SMc02905	dnaX	CDS			1.07775	0.0091608	N.III	II.B.8 DNA - replication, repair, restr./modif.	Putative DNA polymerase III subunit TAU protein	K02343	Q92SX2
SMc02975	pckR	CDS			1.04396	0.00720208	N.III	I.F.13 gluconeogenesis	Putative phosphoenolpyruvate carboxykinase regulator transcription regulator		Q7APB5
SMc02976		CDS			1.0961	0.00285916	N.III	VI.A Not classified regulator	Transcription regulator MarR family		Q92LZ3
SMc03066		CDS			1.17697	0.00387636	N.III	VI.C Hypothetical/Global similarity	Conserved hypothetical protein		Q92RY2
SMc03068	edd	CDS	-1.78216	0.000512143			N.II	I.F.16 Entner-Doudoroff	Phosphogluconate dehydratase	K01690	Q9Z3S0
SMc03069	pgl	CDS	-1.45327	0.000512143			N.II	I.F.16 Entner-Doudoroff	6-phosphogluconolactonase	K01057	Q9Z3S1
SMc03070	zwf	CDS	-1.66067	0.000512143			N.II	I.F.16 Entner-Doudoroff	Glucose-6-phosphate 1-dehydrogenase	K00036	Q9Z3S2
SMc03091	argI1	CDS	-2.2198	0.000512143			N.II	I.I.3 amino acids	Probable arginase	K01476	Q92LN4
SMc03100		CDS			-3.07369	0.000512143	N.III	VI.C Hypothetical/Global similarity	Hypothetical protein signal peptide		Q92LP2
SMc03102		CDS	-1.3904	0.000512143			N.II	I.I.4 carbon compounds	Putative carbon monoxide dehydrogenase large subunit transmembrane protein	K03520	Q92LP4
SMc03103		CDS	-1.676	0.000512143			N.II	I.I.4 carbon compounds	Putative carbon monoxide dehydrogenase medium subunit transmembrane protein	K03519	Q92LP5
SMc03104	hemA	CDS	-1.43267	0.0009592			N.II	I.B.4 heme, porphyrin	Probable 5-aminolevulinic acid synthase (delta-aminolevulinate synthase) (delta-ALA synthetase)	K00643	P08080
SMc03129		CDS			1.36261	0.00250247	N.III	VI.C Hypothetical/Global homology	Conserved hypothetical protein	K01126	Q92LR6
SMc03130		CDS			1.25297	0.00720208	N.III	VI.C Hypothetical/Global homology	Conserved hypothetical protein		Q92LR7
SMc03153	eda2	CDS	-1.12257	0.00354496			N.II	I.F.16 Entner-Doudoroff	Probable KHG/KDPG aldolase (includes: 4-hydroxy-2-oxoglutarate aldolase,2-dehydro-3-deoxyphosphogluconate aldolase)	K01625	Q92LX8
SMc03162		CDS	-1.02638	0.00632638			N.II	VI.C Hypothetical/Global homology	Hypothetical transmembrane protein		Q92LX0
SMc03194	cobF	CDS			1.26481	0.0009592	N.III	I.B.3 cobalamin	Probable Precorrin-6A synthase [deacetylating]	K02228	Q92LU6
SMc03195	ung	CDS			1.3191	0.000512143	N.III	II.B.8 DNA - replication, repair, restr./modif.	Probable uracil-DNA glycosylase	K03648	Q92LU5
SMc03196	modA	CDS	-1.56035	0.000512143	1.52761	0.000512143	N.I	IV.D.1 anions	Putative molybdate-binding periplasmic ABC transporter	K02020	Q92LU4
SMc03199		CDS	-1.38405	0.00285916			N.II	IV.D.1 anions	Putative molybdenum transport associated protein	K02019	Q92LU1
SMc03201	bkdAa	CDS	-1.76131	0.000512143			N.II	I.I.3 Amino Acids	Probable 2-oxoisovalerate dehydrogenase alpha subunit	K00166	Q92LT9
SMc03202	bkdAb	CDS	-1.66877	0.00749637			N.II	I.I.3 Amino Acids	Probable 2-oxoisovalerate dehydrogenase beta subunit	K00167	Q92LT8
SMc03242	typA	CDS			1.48957	0.000512143	N.III	VI.A Not classified regulator	Predicted membrane GTPase	K06207	Q92LG8
SMc03243		CDS			1.51964	0.00176271	N.III	I.F.20 phosphorous metabolism	Putative alkaline phosphatase transmembrane protein	K01113	Q92LG7
SMc03298	TRm26.3	CDS	-1.24833	0.00137247			N.II	V. elements of external origin	Putative transposase number 3 for insertion sequence ISRm26	K07484	Q92LC7
SMc03770	rplU	CDS			1.17566	0.00452512	N.III	III.C.2 ribosomal proteins - synthesis, modification	Probable 5S ribosomal protein L21	K02888	Q92LB8
SMc03773		CDS	-1.49967	0.00354496			N.II	I Small Molecule Metabolism	Putative acetyltransferase		Q92LB6
SMc03796		CDS			1.06792	0.00513758	N.III	VI.C Hypothetical/Global similarity	Conserved hypothetical protein		Q92LA0
SMc03799		CDS			-2.09482	0.000512143	N.III	VI.C Hypothetical/Global similarity	Conserved hypothetical protein		Q92L97
SMc03806	glnK	CDS	6.66595	0.000512143			N.II	I.F.5 nitrogen metabolism	Probable nitrogen regulatory protein PII 2	K04752	Q92L91
SMc03807	amtB	CDS	7.11433	0.000512143			N.II	I.F.5 nitrogen metabolism	Probable ammonium transporter	K03320	Q92L90
SMc03819		CDS			1.40779	0.00320928	N.III	VI.C Hypothetical/Global similarity	Conserved hypothetical protein		Q92L79
SMc03864		CDS			1.12062	0.00176271	N.III	IV.D.2 amino acids, amines, peptides	Putative amino acid-binding periplasmic (signal peptide) ABC transporter	K02030	Q92L38
SMc03869	thiB	CDS			1.81468	0.0069235	N.III	IV.D Transport of small molecules	Thiamine-binding periplasmic protein precursor	K02064	Q92L33
SMc03884	ispA	CDS	-1.14878	0.00320928			N.II	I.B Biosynthesis of cofactors, carriers	Probable geranyltranstransferase	K00795	Q92L22
SMc03900	ndvA	CDS	1.86949	0.000512143	-2.17401	0.000512143	N.I	IV.D.3 carbohydrates, organic acids, alcohols	Beta-1-->2glucan export ATP-binding protein	K24819	P18767
SMc03926	glgX1	CDS	-1.03831	0.00513758			N.II	II.B.5 polysaccharides - (cytoplasmic)	Probable glycogen debranching enzyme	K02438	Q92M11
SMc03934	rpsU2	CDS			1.70225	0.000512143	N.III	III.C.2 ribosomal proteins - synthesis, modification	Probable 3S ribosomal protein	K02970	Q92M03
SMc03938	pntB	CDS	-1.94991	0.000512143	1.03566	0.00832418	N.I	I.F Central intermediary metabolism	Probable NAD(P) transhydrogenase subunit beta transmembrane protein	K00325	Q92LZ9
SMc03939	pntAb	CDS	-1.91518	0.000512143			N.II	I.F Central intermediary metabolism	Probable NAD(P) transhydrogenase subunit alpha part 2 transmembrane protein	K00324	Q92LZ8
SMc03950	pntAa	CDS	-1.99365	0.000512143			N.II	I.F Central intermediary metabolism	NAD(P) transhydrogenase subunit alpha part 1	K00324	Q92LZ7
SMc03983	fbaB	CDS	2.18262	0.000512143			N.II	I.H.8 glycolysis	Probable fructose-bisphosphate aldolase class I	K01623	Q92M78
SMc04019	hemH	CDS	-1.3011	0.000512143			N.II	I.B.4 heme, porphyrin	Probable ferrochelatase	K01772	Q92M52
SMc04093	acsA1	CDS	-1.244	0.00482954			N.II	I.H Energy metabolism, carbon	Probable acetyl-coenzyme A synthetase	K01895	Q92KX2
SMc04094		CDS			1.21201	0.00137247	N.III	VI.C Hypothetical/Global similarity	Conserved hypothetical protein	K09987	Q92KX1
SMc04111	cpaC1	CDS			1.22794	0.00513758	N.III	III.A.2 surface structures	Pilus assembly protein	K02280	Q92T41
SMc04118		CDS			2.42701	0.000512143	N.III	VI.C Hypothetical/Global similarity	Conserved hypothetical transmembrane protein		Q92T46
SMc04127		CDS			1.44243	0.0091608	N.III	IV.D Transport of small molecules	ABC transporter,ATP-binding protein	K23537	Q92T55
SMc04130		CDS			-1.44003	0.00285916	N.III	VI.C Hypothetical/Global similarity	Conserved hypothetical protein		Q92T58
SMc04138		CDS			-1.50335	0.00720208	N.III	I Small Molecule Metabolism	Oxidoreductase		Q92T66
SMc04153		CDS	1.06627	0.0091608			N.II	I Small Molecule Metabolism	Putative aminomethyltransferase	K00605	Q92T80
SMc04171		CDS			1.45752	0.000512143	N.III	VI.C Hypothetical/Global homology	Hemolysin-type calcium-binding protein		Q92NZ9
SMc04226		CDS	-0.976425	0.00720208			N.II	II.A.4 degradation of proteins, peptides, glycopeptides	Putative protease inhibitor		Q92K80
SMc04227	mcpV	CDS	-1.34295	0.00176271			N.II	IV.C Mobility chemotaxis	Probable chemoreceptor (methyl-accepting chemotaxis) transmembrane protein	K03406	Q7APD1
SMc04230		CDS			1.36704	0.00889017	N.III	VI.C Hypothetical/Global homology	Hypothetical transmembrane signal peptide protein	K09922	Q92P89
SMc04232		CDS			-1.84544	0.00176271	N.III	VI.C Hypothetical/Global homology	Putative glycine-rich protein		Q92P87
SMc04236		CDS			-2.73609	0.000512143	N.III	III.B Cell envelope	Putative glycine-rich cell wall structural transmembrane protein	K18481	Q92P84
SMc04245	znuA	CDS			-1.49898	0.000512143	N.III	IV.D.4 cations	Probable high-affinity zinc uptake system ABC transporter	K09815	Q92P75
SMc04246		CDS			-2.3962	0.000512143	N.III	VI.B Hypothetical/Partial homology	Hypothetical transmembrane signal peptide protein		Q92K77
SMc04253		CDS	-1.227	0.00250247			N.II	I Small Molecule Metabolism	Probable dehydrogenase		Q92P70
SMc04256		CDS	-1.60035	0.00354496			N.II	IV.D.3 carbohydrates, organic acids, alcohols	Putative gentiobiose,salicin,and cellobiose ABC transporter,ATP-binding component	K10112	Q92P67
SMc04259		CDS	-1.53247	0.0009592			N.II	IV.D.3 carbohydrates, organic acids, alcohols	Putative gentiobiose,salicin,and cellobiose ABC transporter,periplasmic solute-binding component	K17315	Q92P64
SMc04267	lpsS	CDS	2.23108	0.00777209	-1.49152	0.000512143	N.I	III.A.1 surface polysaccharides/antigens	LPS sulfotransferase		Q92K61
SMc04276		CDS			-1.74931	0.000512143	N.III	VI.C Hypothetical/Global homology	Hypothetical signal peptide protein		Q92NW6
SMc04320	rpsU1	CDS	-1.13986	0.00176271			N.II	III.C.2 ribosomal proteins - synthesis, modification	3S ribosomal protein S21	K02970	Q9Z3S4
SMc04348		CDS	1.52997	0.000512143			N.II	VI.A Not classified regulator	Transcription regulator,TetR family		Q92NV1
SMc04409		CDS			1.17006	0.00176271	N.III	VI.B Hypothetical/Partial homology	Hypothetical protein		Q92KY3
SMc04434	rpmH	CDS			2.01554	0.000512143	N.III	III.C.2 ribosomal proteins - synthesis, modification	Probable 5S ribosomal protein L34	K02914	Q92SF3
SMc04452	ndh	CDS	-2.05579	0.000512143			N.II	I.H.3 aerobic respiration	Putative NADH dehydrogenase transmembrane protein	K03885	Q92NU3
SMc05008		CDS			-1.52611	0.000512143	N.III	VI.C Hypothetical/Global homology	Hypothetical signal peptide protein		B2RED6
SMc06075	ffs	ncRNA			2.48164	0.000512143	N.III		4.5S RNA, component of the signal recognition particle (SRP), Rfam_RF169
SMc06284		ncRNA			1.94343	0.00176271	N.III		Cobalamin riboswitch, Rfam_RF174
SMc06412		ncRNA	-2.01874	0.000512143	2.9197	0.000512143	N.I
SMc06418		ncRNA			2.71267	0.000512143	N.III
SMc06458		ncRNA			1.60314	0.000512143	N.III
SMc06496		ncRNA			3.1701	0.000512143	N.III		aR14
SMc06497		ncRNA			2.63407	0.000512143	N.III		aR14
SMc06500		CDS	-2.10692	0.000512143			N.II
SMc06510		ncRNA			1.50469	0.00213505	N.III		Rfam_RF519_suhB
SMc06511		ncRNA	-1.66772	0.000512143	1.73437	0.000512143	N.I		Rfam_RF519_suhB
SMc06520		CDS			-2.90278	0.000512143	N.III
SMc06565		ncRNA			2.02945	0.000512143	N.III
SMc06663		ncRNA			3.20928	0.000512143	N.III
SMc06675		ncRNA	2.76175	0.000512143			N.II
SMc06677		ncRNA			1.21619	0.000512143	N.III
SMc06696		ncRNA			2.27985	0.000512143	N.III
SMc06705		ncRNA	1.87712	0.000512143	3.24856	0.000512143	N.I		aR14
SMc06778		ncRNA	-1.05148	0.00544021			N.II
SMc06779		ncRNA	-1.39715	0.000512143			N.II
SMc06827		ncRNA			1.73894	0.00213505	N.III
SMc06867	ssrS	ncRNA			2.33462	0.000512143	N.III		6S RNA, global regulatory non-coding RNA that modulates gene expression, Rfam_RF13
SMc06875		ncRNA			1.73161	0.000512143	N.III
SMc07005		ncRNA			3.10874	0.000512143	N.III
SMc07046		ncRNA	1.39613	0.0009592			N.II
SMc07132		ncRNA			2.00729	0.00213505	N.III
SMc07200		ncRNA	3.44226	0.000512143			N.II
SMc07253			-1.38912	0.000512143			N.II

## Sheet: Table Legend
Supplementary Table S2. Nitrogen-responsive genes. List of genes with significant 2-fold or greater expression changes in response to nitrogen stress. Columns include the gene (A); gene name if given (B); type of sequence where CDS= coding region and ncRNA = non-coding RNA (C); log2 fold change and q-value for the NSRP comparison (D, E) and NSRp comparison (F, G); Cluster assignment as discussed …
