# Supplementary material for: The Sinorhizobium meliloti Nitrogen Stress Response Changes Radically in the Face of Concurrent Phosphate Stress
Source: Front Microbiol. 2022 Jan 27;13:800146. doi: 10.3389/fmicb.2022.800146 (PMC8829014; doi:10.3389/fmicb.2022.800146)
Supplement: Supplementary file 3 [file Table_3.XLSX]

## Sheet: Table S3. Phosphate
			PSRN		PSRn
gene	name	type	log2 fold	q-value	log2 fold	q-value	Cluster	Classification from S. meliloti database (https://iant.toulouse.inra.fr/bacteria/annotation/cgi/rhime.cgi)	description	K number for KEGG path	uniprot accession
SMa0002	fdoG	CDS	2.79549	0.000512143	2.63076	0.000512143	P.I	I.H Energy metabolism, carbon	formate dehydrogenase,major subunit (formate dehydrogenase alpha subunit)	K00123	Q931E0
SMa0005	fdoH	CDS			2.5899	0.00213505	P.III	I.H Energy metabolism, carbon	formate dehydrogenase-O,iron-sulfur subunit	K00124	Q931D9
SMa0017		CDS			1.63559	0.000512143	P.III	VI.D Unknown	hypothetical protein		Q931D4
SMa0021		CDS	2.8364	0.000512143			P.II	V. elements of external origin	hypothetical protein		Q931D3
SMa0025		CDS			1.4135	0.000512143	P.III	VI.C Hypothetical/Global similarity	hypothetical protein		Q931D2
SMa0036		CDS	-1.64567	0.000512143			P.II	IV.D Transport of small molecules	ABC transporter,ATP-binding protein	K06022, K06158, K10834	Q931C7
SMa0041		CDS	1.99861	0.00602255			P.II	I Small Molecule Metabolism	zinc dependent oxidoreductase-releated quinone oxidoreductase		Q931C5
SMa0044		CDS	2.25915	0.000512143	2.6238	0.000512143	P.I	VI.B Hypothetical/Partial homology	conserved hypothetical protein		Q931C4
SMa0045	cah	CDS	7.26765	0.000512143	5.88263	0.000512143	P.I	I.H.3 aerobic respiration	Carbonic anhydrase	K01674	Q931C3
SMa0058		CDS	-1.09275	0.0069235			P.II	I Small Molecule Metabolism	N-acylglucosamine 2-epimerase family protein		Q931B8
SMa0062		CDS	-1.49082	0.00995897			P.II	VI.A Not classified regulator	Transcriptional regulator,GntR family		Q931B5
SMa0064		CDS	-1.54695	0.0009592	-1.72229	0.000512143	P.I	I Small Molecule Metabolism	Putative dehydratase/enolase		Q931B3
SMa0067		CDS	-1.74454	0.000512143			P.II	IV.D.3 carbohydrates, organic acids, alcohols	Putative pentose monosaccharide ABC transporter,periplasmic solute-binding protein	K02058	Q931B1
SMa0079		CDS	-1.525	0.000512143			P.II	IV.D.2 amino acids, amines, peptides	ABC transporter,permease	K02029	Q931A5
SMa0082		CDS	-1.62771	0.000512143			P.II	IV.D.2 amino acids, amines, peptides	ABC transporter,periplasmic solute-binding protein	K02030	Q931A3
SMa0083		CDS	-1.75439	0.000512143			P.II	IV.D.2 amino acids, amines, peptides	ABC transporter,ATP-binding protein	K02028	Q931A2
SMa0085		CDS	-1.25464	0.00137247			P.II	I Small Molecule Metabolism	dehydrogenase	K22229	Q931A1
SMa0089		CDS			2.41236	0.000512143	P.III	VI.C Hypothetical/Global homology	conserved hypothetical protein		Q930Z9
SMa0093		CDS			2.87076	0.000512143	P.III	I.I.3 amino acids	Branched-chain amino acid aminotransferase	K00824	Q930Z7
SMa0101		CDS	1.53621	0.000512143			P.II	I Small Molecule Metabolism	Amidohydrolase,may be involved in metabolism of lysine,ectoine,and asparagine		Q930Z4
SMa0113		CDS	1.74491	0.000512143	1.09825	0.00137247	P.I	VI.A Not classified regulator	Sensor histidine kinase		Q930Y7
SMa0114		CDS	2.14011	0.000512143			P.II	VI.A Not classified regulator	two-component response regulator		Q930Y6
SMa0116		CDS	1.89395	0.00482954			P.II	IV.B Chaperoning	DnaJ/CbpA-type protein		Q930Y5
SMa0124	groEL3	CDS			1.31384	0.000512143	P.III	IV.B Chaperoning	6 kDa chaperonin	K04077	Q930Y0
SMa0125	groES3	CDS			1.41137	0.000512143	P.III	IV.B Chaperoning	1 kDa chaperonin	K04078	Q930X9
SMa0130		CDS	-2.2914	0.000512143	-1.49298	0.000512143	P.I	I.C Fatty acid biosynthesis	Fatty acid desaturase	K10255	Q930X6
SMa0134		CDS	3.57303	0.000512143			P.II	VI.C Hypothetical/Global similarity	conserved hypothetical protein		Q930X4
SMa0136		CDS	3.68419	0.000512143	1.84697	0.000512143	P.I	VI.C Hypothetical/Global similarity	conserved hypothetical protein		Q930X3
SMa0142		CDS	2.09537	0.000512143	2.37745	0.000512143	P.I	II.A.4 degradation of proteins, peptides, glycopeptides	extracellular serine protease		Q930X0
SMa0172		CDS	1.50442	0.000512143			P.II	I.F.20 phosphorus metabolism	Putative polyphosphate kinase 2	K22468	Q930V2
SMa0175		CDS	1.73283	0.000512143			P.II	VI.C Hypothetical/Global homology	Conserved hypothetical protein		Q930V1
SMa0181	cspA7	CDS			2.03054	0.000512143	P.III	IV.F Adaptation	CspA7 cold shock protein	K03704	Q930U8
SMa0187		CDS	1.62425	0.000512143			P.II	I Small Molecule Metabolism	short chain alcohol dehydrogenase-related dehydrogenase		Q930U6
SMa0196		CDS	-1.37914	0.00420562			P.II	II.A.3 degradation of polysaccharides	gluconolactonase	K01053	Q926I2
SMa0197		CDS			2.33385	0.00995897	P.III	IV.D.3 carbohydrates, organic acids, alcohols	ABC transporter,permease,likely transports galactose and,to a lesser extent,L-arabinose,glucose,D-arabinose,L-fucose and D- fucose	K10440	Q930U1
SMa0222	GtrB	CDS			1.19343	0.00805017	P.III	VI.A Not classified regulator	Transcriptional regulator,GntR family		Q930S7
SMa0228	gdhA	CDS	-2.09504	0.000512143	-1.84228	0.000512143	P.I	I.I.3 Amino Acids	NADP-specific glutamate dehydrogenase	K00262	Q930S3
SMa0235		CDS	-3.13987	0.000512143	-1.0296	0.0069235	P.I	I Small Molecule Metabolism	dihydroxy-acid dehydratase	K22186	Q930R9
SMa0241		CDS	-2.79257	0.000512143	-1.85283	0.000512143	P.I	I Small Molecule Metabolism	Putative epimerase	K22025	Q930R7
SMa0244		CDS	-1.62116	0.000512143	-1.40701	0.00213505	P.I	IV.D Transport of small molecules	Putative dehydrogenase,FAD-dependent		Q930R6
SMa0247		CDS	-3.1595	0.000512143	-2.63092	0.000512143	P.I	VI.C Hypothetical/Global homology	Conserved hypothetical protein		Q930R4
SMa0249	gntA	CDS	-2.66187	0.0009592			P.II	IV.D.3 carbohydrates, organic acids, alcohols	TRAP-type small permease component,required for growth on gluconate	K21394	Q930R3
SMa0250	gntB	CDS	-3.04489	0.000512143	-1.97154	0.000512143	P.I	IV.D.3 carbohydrates, organic acids, alcohols	TRAP-type large permease component,required for growth on gluconate	K21393	Q930R2
SMa0252	gntC	CDS	-4.37197	0.000512143	-2.46773	0.000512143	P.I	IV.D.3 carbohydrates, organic acids, alcohols	TRAP-type periplasmic solute-binding protein,required for growth on gluconate	K21395	Q930R1
SMa0277		CDS	1.28596	0.00889017	1.44866	0.00573901	P.I	VI.C Hypothetical/Global homology	conserved hypothetical protein		Q930P8
SMa0312		CDS	1.9447	0.000512143	2.61109	0.000512143	P.I	VI.C Hypothetical/Global homology	hypothetical protein		Q930M6
SMa0312		CDS	1.9447	0.000512143			P.II	VI.C Hypothetical/Global homology	hypothetical protein		Q930M6
SMa0314		CDS			2.55789	0.000512143	P.III	VI.C Hypothetical/Global homology	conserved hypothetical protein		Q930M5
SMa0316		CDS	1.83061	0.000512143	1.65405	0.000512143	P.I	VI.B Hypothetical/Partial homology	Hypothetical protein	K01607	Q930M4
SMa0320		CDS	1.89345	0.00176271			P.II	I Small Molecule Metabolism	short chain alcohol dehydrogenase-related dehydrogenase		Q930M2
SMa0355		CDS	1.35766	0.00602255	1.14001	0.00482954	P.I	VI.A Not classified regulator	Transcriptional regulator,LysR family		Q930K4
SMa0364		CDS	1.88799	0.00452512	2.33872	0.00420562	P.I	VI.D Unknown	hypothetical protein		Q930J9
SMa0372		CDS	-1.98769	0.000512143			P.II	VI.A Not classified regulator	Transcriptional regulator,LysR family		Q930J5
SMa0389		CDS			1.22398	0.00602255	P.III	I Small Molecule Metabolism	short chain alcohol dehydrogenase-related dehydrogenase		Q930I9
SMa0392		CDS			-1.90187	0.000512143	P.III	IV.D Transport of small molecules	ABC transporter,periplasmic solute-binding protein	K02055	Q930I7
SMa0400		CDS			-1.51596	0.000512143	P.III	I Small Molecule Metabolism	Dehydrogenase,Zn-dependent		Q930I3
SMa0424		CDS	3.14461	0.000512143	3.47517	0.000512143	P.I	II.B.8 DNA - replication, repair, restr./modif.	ATP-dependent DNA ligase	K01971	Q930H2
SMa0426		CDS	2.08496	0.00661481	2.99544	0.000512143	P.I	VI.C Hypothetical/Global homology	conserved hypothetical protein	K10979	Q930H1
SMa0436		CDS			2.48188	0.000512143	P.III	VI.C Hypothetical/Global homology	hypothetical protein		Q930G7
SMa0462		CDS			1.10888	0.00137247	P.III	VI.C Hypothetical/Global homology	conserved hypothetical protein		Q930F7
SMa0464	cyaI2	CDS	1.55314	0.000512143	1.64794	0.000512143	P.I	I.E.1 global regulatory functions	adenylate/guanylate cyclase		Q930F6
SMa0466		CDS			1.40286	0.000512143	P.III	IV.D Transport of small molecules	ABC transporter,periplasmic solute-binding protein	K02035	Q930F5
SMa0512	idnD	CDS	1.86926	0.00176271			P.II	I Small Molecule Metabolism	IdnD L-idonate 5-dehydrogenase	K00098	Q930C9
SMa0538		CDS			1.3079	0.00749637	P.III	VI.D Unknown	Hypothetical protein		Q930B6
SMa0559		CDS			2.83688	0.00944057	P.III	I.I Degradation	4-carboxymuconolactone decarboxylase	K01607	Q930A6
SMa0564		CDS			1.44173	0.00213505	P.III	I Small Molecule Metabolism	Putative dehydrogenase		Q930A3
SMa0570	cyaF4	CDS			1.61467	0.000512143	P.III	I.E.1 global regulatory functions	CyaF4 adenylate cyclase		Q930A0
SMa0576		CDS	2.05446	0.00137247	1.57111	0.00250247	P.I	IV.D Transport of small molecules	ABC transporter,periplasmic solute-binding protein	K01999	Q92ZZ6
SMa0579	cyaN	CDS	1.18161	0.00749637			P.II	I.E.1 global regulatory functions	adenylate/guanylate cyclase	K01768	Q92ZZ5
SMa0583	nrtB	CDS	2.34209	0.00213505	-1.8115	0.00632638	P.I	IV.D Transport of small molecules	Nitrate transporter,permease	K15577	Q92ZZ2
SMa0585	nrtA	CDS			-3.09389	0.000512143	P.III	IV.D Transport of small molecules	Nitrate transporter,periplasmic nitrate binding protein	K15576	Q92ZZ1
SMa0601		CDS			1.17047	0.00176271	P.III	VI.C Hypothetical/Global homology	conserved hypothetical protein		Q92ZY4
SMa0612	fixN3	CDS	2.03024	0.000512143	1.99485	0.000512143	P.I	I.G.1 electron transport	FixN3 cytochrome c oxidase subunit 1	K00404	Q92ZX8
SMa0615	fixO3	CDS	3.03433	0.000512143	2.91733	0.000512143	P.I	I.G.1 electron transport	FixO3 cytochrome-c oxidase subunit	K00405	Q92ZX7
SMa0617	fixP3	CDS	2.64869	0.000512143	2.76767	0.000512143	P.I	I.G.1 electron transport	FixP3 Diheme c-type cytochrome	K00406	Q92ZX5
SMa0620		CDS	3.3704	0.00137247	2.5934	0.000512143	P.I	VI.C Hypothetical/Global homology	conserved hypothetical protein		Q92ZX4
SMa0621	fixI2	CDS	2.53783	0.000512143	3.31274	0.000512143	P.I	I.G.1 electron transport	FixI2 E1-E2 type cation ATPase	K01533	Q92ZX3
SMa0630		CDS	-3.50461	0.000512143			P.II	VI.C Hypothetical/Global homology	conserved hypothetical transmembrane protein	K22044	Q92ZW7
SMa0633		CDS	-5.18595	0.000512143	-3.69045	0.000512143	P.I	VI.C Hypothetical/Global similarity	hypothetical protein		Q92ZW5
SMa0636		CDS	-6.03732	0.000512143	-4.78606	0.000512143	P.I	VI.C Hypothetical/Global homology	conserved hypothetical protein		Q92ZW4
SMa0667		CDS	-3.80946	0.000512143	-3.86489	0.000512143	P.I	VI.C Hypothetical/Global similarity	conserved hypothetical protein		Q92ZU6
SMa0669		CDS	-3.13692	0.000512143	-2.34033	0.000512143	P.I	VI.B Hypothetical/Partial homology	Hypothetical transmembrane protein,HlyD-family		Q92ZU5
SMa0670		CDS	-1.58923	0.00285916			P.II	I.F.20 phosphorus metabolism	Putative polyphosphate kinase 2	K22468	Q92ZU4
SMa0682		CDS	-3.44935	0.000512143			P.II	I.I Degradation	decarboxylase (lysine,ornithine,arginine)	K01584	Q92ZT8
SMa0684		CDS	-2.57153	0.000512143			P.II	IV.D Transport of small molecules	amino acid transporter	K03294	Q92ZT6
SMa0687		CDS			3.26052	0.000512143	P.III	VI.C Hypothetical/Global homology	hypothetical protein		Q92ZT5
SMa0690		CDS	-5.16517	0.000512143			P.II	VI.B Hypothetical/Partial homology	Hypothetical protein		Q92ZT3
SMa0693	arcA1	CDS	-3.31649	0.000512143	-2.66355	0.000512143	P.I	I.I.3 amino acids	ArcA1 arginine deiminase	K01478	Q92ZT2
SMa0695	arcB	CDS	-1.50933	0.00213505			P.II	I.I.3 amino acids	ArcB,ornithine carbamoyltransferase,catabolic	K00611	Q92ZT1
SMa0738	cspA6	CDS	-1.00483	0.00995897			P.II	IV.F Adaptation	CspA6 cold shock protein	K03704	Q92ZQ8
SMa0744	groEL2	CDS	-2.92857	0.000512143	-2.16965	0.000512143	P.I	IV.B Chaperoning	groEL2 chaperonin	K04077	Q92ZQ4
SMa0751		CDS	2.25338	0.00387636	2.11541	0.00137247	P.I	I.I Degradation	Ring-hydroxylating dioxygenase,likely required for utilization of stachydrine	K24003	Q92ZP9
SMa0762	fixK2	CDS	-5.29479	0.000512143	-8.29917	0.000512143	P.I	I.G.1 electron transport	FixK2 transcriptional regulator	K15861	Q92ZP2
SMa0763		CDS	-6.40262	0.000512143	-6.33815	0.000512143	P.I	VI.B Hypothetical protein/partial homology	hypothetical protein	K07005	Q92ZP1
SMa0765	fixN2	CDS	-6.1459	0.000512143	-5.54092	0.000512143	P.I	I.G.1 electron transport	FixN2 cytochrome c oxidase subunit I	K00404	Q92ZP0
SMa0766	fixO2	CDS	-4.32163	0.000512143			P.II	I.G.1 electron transport	FixO2 cytochrome c oxidase subunit	K00405	Q92ZN9
SMa0767	fixQ2	CDS	-4.01541	0.00176271			P.II	I.G.1 electron transport	FixQ2 nitrogen fixation protein	K00407	Q92ZN8
SMa0769	fixP2	CDS	-3.81835	0.000512143	-2.84455	0.000512143	P.I	I.G.1 electron transport	FixP2 Diheme c-type cytochrome	K00406	Q92ZN7
SMa0773	noeA	CDS	-1.20336	0.000512143	-1.33789	0.000512143	P.I	IV.H Nodulation	NoeA host specific nodulation protein		Q52892
SMa0791		CDS			1.59237	0.000512143	P.III	VI.C Hypothetical/Global homology	Conserved hypothetical protein		Q92ZM8
SMa0796		CDS			1.19042	0.0069235	P.III	I Small Molecule Metabolism	aldehyde dehydrogenase	K23463	Q92ZM4
SMa0799		CDS	1.1311	0.00513758			P.II	IV.D Transport of small molecules	ABC transporter,periplasmic solute-binding protein	K02055	Q92ZM2
SMa0814	nifB	CDS	-1.47556	0.000512143			P.II	I.F.6 nitrogen fixation	NifB FeMo cofactor biosynthesis protein	K02585	P09824
SMa0815	nifA	CDS	-2.00244	0.000512143	-1.57766	0.00573901	P.I	I.F.6 nitrogen fixation	NifA transcriptional activator	K02584	P03028
SMa0817	fixC	CDS	1.17583	0.00805017			P.II	I.F.6 nitrogen fixation	FixC oxidoreductase	K00313	P09820
SMa0861		CDS			1.40441	0.000512143	P.III	V. elements of external origin	Transposase,fragment	K07484	Q92ZK4
SMa0937		CDS	1.89875	0.000512143	1.41698	0.0009592	P.I	VI.C Hypothetical/Global homology	Conserved hypothetical transmembrane protein	K22044	Q92ZH9
SMa0943		CDS	2.25543	0.000512143	1.97895	0.000512143	P.I	I Small Molecule Metabolism	arylsulfatase		Q92ZH5
SMa0969		CDS	2.61813	0.0069235			P.II	VI.A Not classified regulator	Response regulator	K07657	Q92ZG1
SMa1001		CDS			1.05765	0.00970149	P.III	VI.C Hypothetical/Global homology	conserved hypothetical protein		Q92ZE7
SMa1016		CDS			-1.77181	0.000512143	P.III	I Small Molecule Metabolism	Putative acyltransferase,transmembrane protein		Q92ZD8
SMa1038		CDS			-1.50923	0.000512143	P.III	I.H Energy metabolism, carbon	Multicopper oxidase	K22348	Q92ZC7
SMa1076		CDS	-1.38814	0.000512143			P.II	VI.A Not classified regulator	Putative transcription regulator		Q92ZA9
SMa1079	tspO	CDS	-4.71383	0.000512143	-3.47156	0.00482954	P.I	VI.A Not classified regulator	TspO Tryptophan rich sensory protein	K05770	Q92ZA7
SMa1081		CDS	-5.29487	0.000512143			P.II	VI.C Hypothetical/Global similarity	hypothetical protein		Q92ZA6
SMa1082		CDS	-6.02008	0.000512143	-4.59793	0.000512143	P.I	VI.B Hypothetical/Partial homology	Hypothetical protein		Q92ZA5
SMa1084		CDS	-4.22873	0.000512143	-2.18911	0.000512143	P.I	I Small Molecule Metabolism	Probable phosphoketolase	K01621	Q92ZA4
SMa1086		CDS	-6.43616	0.000512143	-4.26928	0.000512143	P.I	VI.C Hypothetical/Global homology	Conserved hypothetical protein		Q92ZA3
SMa1087		CDS	-5.01615	0.000512143	-2.65319	0.00250247	P.I	IV.D Transport of small molecules	Cation transport ATPase		Q92ZA2
SMa1092		CDS	-5.37955	0.000512143			P.II	VI.D Unknown	hypothetical protein		Q92Z99
SMa1093		CDS	-4.51555	0.000512143	-3.46493	0.000512143	P.I	VI.C Hypothetical/Global similarity	hypothetical protein		Q92Z98
SMa1095		CDS	-4.66254	0.000512143	-3.04674	0.00387636	P.I	VI.B Hypothetical protein/partial homology	hypothetical protein		Q92Z97
SMa1099		CDS			1.55664	0.00137247	P.III	VI.C Hypothetical/Global homology	conserved hypothetical protein		Q926I1
SMa1118	hspC2	CDS	-4.72026	0.000512143	-4.56786	0.000512143	P.I	IV.F Adaptation	HspC2 heat shock protein	K13993	Q92Z87
SMa1120		CDS	-4.8388	0.000512143	-3.38134	0.000512143	P.I	IV.D Transport of small molecules	ABC transporter,ATP-binding protein	K02003	Q92Z86
SMa1122		CDS	-1.83228	0.000512143			P.II	VI.C Hypothetical/Global similarity	Putative permease	K02004	Q92Z85
SMa1126		CDS	-4.54321	0.000512143	-2.84521	0.000512143	P.I	II.A.4 degradation of proteins, peptides, glycopeptides	Putative protease,transmembrane protein	K06402	Q92Z83
SMa1128	degP4	CDS	-6.98699	0.000512143	-5.56279	0.000512143	P.I	II.A.4 degradation of proteins, peptides, glycopeptides	DegP4 protease like protein		Q92Z82
SMa1131		CDS	-6.15873	0.000512143	-6.09427	0.000512143	P.I	II.B.6 RNA synthesis, modification , DNA transcription	Metallo-beta-lactamase superfamily protein	K07576	Q92Z81
SMa1132		CDS	-5.60701	0.000512143	-4.73061	0.000512143	P.I	VI.C Hypothetical/Global similarity	hypothetical protein		Q92Z80
SMa1134		CDS	-4.65136	0.000512143	-4.0418	0.000512143	P.I	VI.C Hypothetical/Global homology	Conserved hypothetical protein		Q92Z79
SMa1146		CDS	-2.84494	0.000512143			P.II	VI.C Hypothetical/Global similarity	conserved hypothetical protein	K09181	Q92Z73
SMa1147		CDS	-5.99183	0.000512143	-4.22444	0.000512143	P.I	VI.C Hypothetical/Global homology	Conserved hypothetical protein		Q92Z72
SMa1149		CDS	-4.75338	0.000512143	-2.35101	0.000512143	P.I	VI.C Hypothetical/Global homology	Conserved hypothetical protein		Q92Z71
SMa1151		CDS	-3.25636	0.000512143			P.II	VI.C Hypothetical/Global homology	Conserved hypothetical protein	K07005	Q92Z70
SMa1153		CDS	-6.45216	0.000512143	-3.95167	0.000512143	P.I	VI.C Hypothetical/Global homology	conserved hypothetical protein		Q92Z69
SMa1154		CDS	-6.18884	0.000512143	-3.19096	0.000512143	P.I	VI.C Hypothetical/Global homology	conserved hypothetical protein		Q92Z68
SMa1155		CDS	-2.97631	0.000512143	-1.40995	0.00720208	P.I	IV.D.4 cations	Cation transport P-type ATPase		Q92Z67
SMa1156		CDS	-5.45639	0.000512143	-3.46675	0.000512143	P.I	I.H Energy metabolism, carbon	Alcohol dehydrogenase,Zn-dependent class III		Q92Z66
SMa1158		CDS	-6.13442	0.000512143	-4.43649	0.000512143	P.I	VI.C Hypothetical/Global homology	Conserved hypothetical protein		Q92Z65
SMa1163		CDS	-4.09819	0.000512143	-2.03685	0.000512143	P.I	IV.D.4 cations	Cation transport P-type ATPase		Q92Z60
SMa1166		CDS	-5.80486	0.000512143	-5.69588	0.000512143	P.I	I Small Molecule Metabolism	Protein containing an alpha/beta hydrolase fold		Q92Z59
SMa1168		CDS	-2.48731	0.000512143			P.II	I Small Molecule Metabolism	Dehydrogenase,FAD-dependent		Q92Z58
SMa1169		CDS	-6.09005	0.000512143	-4.68192	0.000512143	P.I	VI.B Hypothetical protein/partial homology	hypothetical protein		Q92Z57
SMa1170		CDS	-4.17955	0.000512143			P.II	VI.C Hypothetical/Global homology	conserved hypothetical protein		Q92Z56
SMa1176		CDS	-4.69998	0.000512143	-3.33011	0.000512143	P.I	VI.C Hypothetical/Global similarity	Hypothetical protein		Q92Z52
SMa1178		CDS	-4.96429	0.000512143	-3.9613	0.000512143	P.I	VI.C Hypothetical/Global homology	conserved hypothetical protein		Q92Z51
SMa1179	nosR	CDS	-6.87617	0.000512143	-6.26015	0.000512143	P.I	I.F.5 nitrogen metabolism	NosR regulatory protein	K19339	Q92Z50
SMa1182	nosZ	CDS	-4.27555	0.00213505			P.II	I.F.5 nitrogen metabolism	NosZ nitrous oxide reductase	K00376	Q59746
SMa1191	hmp	CDS	1.97675	0.000512143			P.II	VI.C Hypothetical/Global similarity	Flavohemoprotein	K05916	Q7WUM8
SMa1194	nnrS	CDS	-2.77843	0.000512143			P.II	VI.C Hypothetical/Global similarity	Putative haem and copper containing membrane protein		Q92Z46
SMa1195		CDS	-4.84012	0.000512143	-3.42423	0.000512143	P.I	VI.C Hypothetical/Global homology	conserved hypothetical protein	K07322	Q92Z45
SMa1198		CDS	-1.55553	0.00176271			P.II	IV.D.5 incorporation metal ions	Copper binding protein	K14166	Q92Z43
SMa1200		CDS	-4.15128	0.000512143	-3.07844	0.00250247	P.I	VI.C Hypothetical/Global homology	conserved hypothetical protein	K09796	Q92Z42
SMa1201		CDS	-6.94947	0.000512143	-5.11958	0.000512143	P.I	VI.C Hypothetical/Global similarity	hypothetical protein		Q92Z41
SMa1207		CDS	-6.973	0.000512143	-4.80471	0.000512143	P.I	VI.A Not classified regulator	Transcriptional regulator,CAP/Crp family		Q92Z40
SMa1211	fixG	CDS	-7.59985	0.000512143			P.II	I.G.1 electron transport	FixG iron sulfur membrane protein		P18396
SMa1213	fixP1	CDS	-5.50125	0.000512143	-4.65367	0.000512143	P.I	I.G.1 electron transport	FixP1 di-heme c-type cytochrome	K00406	Q05577
SMa1216	fixO1	CDS	-6.80393	0.000512143	-6.09052	0.000512143	P.I	I.G.1 electron transport	FixO1 cytochrome C oxidase subunit	K00405	Q7D4J8
SMa1220	fixN1	CDS	-6.44265	0.000512143	-6.05727	0.000512143	P.I	I.G.1 electron transport	FixN1 cytochrome c oxidase subunit 1	K00404	Q05572
SMa1223	fixM	CDS	-4.9757	0.000512143			P.II	I.G.1 electron transport	FixM flavoprotein oxidoreductase	K07005	P13486
SMa1225	fixK1	CDS	-4.72879	0.000512143	-8.1374	0.000512143	P.I	I.F.6 nitrogen fixation	FixK1 transcriptional regulator	K15861	P13295
SMa1226	fixT1	CDS	-4.13377	0.000512143	-4.56297	0.000512143	P.I	I.G.1 electron transport	FixT1 antikinase protein		O86464
SMa1231		CDS	-7.8631	0.000512143	-6.02334	0.000512143	P.I	VI.C Hypothetical/Global homology	conserved hypothetical protein		Q92Z39
SMa1232	napC	CDS	-2.95908	0.000512143	-1.52269	0.00889017	P.I	I.H.2 anaerobic respiration	NapC membrane-bound tetraheme cytochrome c subunit	K02569	Q92Z38
SMa1241	napE	CDS	-4.60017	0.000512143			P.II	I.H.2 anaerobic respiration	NapE component of periplasmic nitrate reductase	K02571	Q92Z33
SMa1243	azu1	CDS	-7.71366	0.000512143	-5.49452	0.000512143	P.I	I Small Molecule Metabolism	Azu1 pseudoazurin		Q92Z32
SMa1245	nnrR	CDS			1.38525	0.000512143	P.III	I.F.5 nitrogen metabolism	NnrR transcriptional regulator,likely involved in the regulation of nap,nir,and/or nor genes	K21564	Q92Z31
SMa1252	nnrS	CDS	-2.30834	0.000512143	-1.77961	0.00213505	P.I	VI.C Hypothetical/Global similarity	NnrS family protein	K07234	Q92Z28
SMa1256		CDS	-1.73056	0.0009592			P.II	VI.C Hypothetical/Global homology	conserved hypothetical protein		Q92Z24
SMa1259		CDS	-3.94473	0.000512143	-2.33111	0.000512143	P.I	VI.C Hypothetical/Global homology	conserved hypothetical protein		Q92Z23
SMa1261		CDS			-3.69679	0.000512143	P.III	VI.C Hypothetical/Global homology	conserved hypothetical protein		Q92Z22
SMa1266	hemN	CDS	-6.73645	0.000512143	-4.5222	0.000512143	P.I	I.B.4 heme, porphyrin	HemN coproporphyrinogen III oxidase	K02495	Q92Z19
SMa1273	norB	CDS	-2.50758	0.000512143	-1.69681	0.00805017	P.I	I.F.5 nitrogen metabolism	NorB nitric oxide reductase,large subunit	K04561	Q92Z16
SMa1276	norC	CDS	-3.79177	0.0069235			P.II	I.F.5 nitrogen metabolism	NorC nitric oxide reductase,small subunit	K02305	Q92Z15
SMa1279	norE	CDS	-2.16156	0.000512143	-2.78615	0.00320928	P.I	I.F.5 nitrogen metabolism	NorE accessory protein for nitric oxide reductase	K02164	Q92Z14
SMa1283	nnrU	CDS	-6.10958	0.000512143	-4.53679	0.000512143	P.I	I.F.5 nitrogen metabolism	NnrU-like transmembrane protein		Q92Z13
SMa1288		CDS	-2.48573	0.000512143	-2.10229	0.000512143	P.I	I Small Molecule Metabolism	Carboxy-lyase	K03182	Q92Z11
SMa1294		CDS	-2.67879	0.000512143			P.II	VI.C Hypothetical/Global homology	conserved hypothetical protein		Q92Z07
SMa1328		CDS	1.52157	0.00573901			P.II	IV.D Transport of small molecules	Permease		Q92YY7
SMa1332		CDS	-1.32652	0.00387636			P.II	VI.C Hypothetical/Global homology	Conserved hypothetical protein		Q92YY4
SMa1347		CDS	-1.83882	0.000512143			P.II	I Small Molecule Metabolism	dehydrogenase	K00058	Q92YX6
SMa1349		CDS	-1.56153	0.0009592			P.II	VI.A Not classified regulator	Transcriptional regulator,GntR family		Q92YX5
SMa1354		CDS	-1.39895	0.0009592			P.II	I Small Molecule Metabolism	Isomerase	K18910	Q92YX2
SMa1355		CDS			1.37947	0.000512143	P.III	VI.C Hypothetical/Global homology	Conserved hypothetical protein		Q92YX1
SMa1364		CDS	2.30867	0.00137247			P.II	IV.D Transport of small molecules	ABC transporter,periplasmic solute-binding protein	K02027	Q92YW6
SMa1447		CDS	1.1646	0.00320928			P.II	IV.D Transport of small molecules	Permease,MFS	K08369	Q92YS3
SMa1450		CDS			1.95554	0.000512143	P.III	I Small Molecule Metabolism	Thiolase	K00626	Q92YS2
SMa1495		CDS			-2.82429	0.000512143	P.III	I.F Central intermediary metabolism	Aminotransferase	K00830	Q92YP9
SMa1507		CDS	-1.1071	0.00387636	-1.99216	0.000512143	P.I	VI.C Hypothetical/Global homology	Conserved hypothetical protein	K07335	Q92YP3
SMa1509		CDS			-1.77678	0.00513758	P.III	IV.D Transport of small molecules	ABC transporter,ATP-binding protein	K23537	Q92YP2
SMa1519	nuoI2	CDS	1.59366	0.00995897			P.II	I.G.1 electron transport	NADH-quinone oxidoreductase subunit I 2	K00338	Q92YN8
SMa1521		CDS	2.00224	0.00720208			P.II	VI.C Hypothetical/Global homology	conserved hypothetical protein		Q92YN7
SMa1523	nuoG2	CDS			1.63032	0.00250247	P.III	I.G.1 electron transport	NuoG2 NADH:quinone oxidoreductase subunit G 2	K00336	P56914
SMa1547	pcm	CDS	1.47486	0.000512143	1.63392	0.000512143	P.I	II MACROMOLECULE METABOLISM	protein-L-isoaspartate O-methyltransferase	K00573	Q92YN1
SMa1548		CDS	1.82764	0.000512143	2.21977	0.000512143	P.I	VI.A Not classified regulator	Diguanylate cyclase/phosphodiesterase		Q92YN0
SMa1550		CDS			2.19904	0.000512143	P.III	VI.A Not classified regulator	Response regulator		Q92YM9
SMa1556	mcpS	CDS	3.13665	0.00387636	2.58678	0.00832418	P.I	IV.C Mobility chemotaxis	Methyl-accepting chemotaxis protein	K03406	Q92YM6
SMa1558		CDS	1.74912	0.000512143	1.90996	0.00482954	P.I	VI.A Not classified regulator	Sensor histidine kinase	K03407	Q92YM5
SMa1561	cheB2	CDS	1.78788	0.000512143	1.86095	0.000512143	P.I	IV.C Mobility chemotaxis	Chemotaxis response regulator protein-glutamate methylesterase	K03412	Q92YM4
SMa1562		CDS			1.68818	0.000512143	P.III	III.A.2 surface structures	Putative pilus assembly protein	K12511	Q92YM3
SMa1586	syrB2	CDS	-1.63912	0.000512143			P.II	VI.A Not classified regulator	SyrB2 regulator	K07497	Q9Z3Q1
SMa1587	eglC	CDS	1.3374	0.000512143			P.II	III.A Cell Exterior	EglC Endo-1,3-1,4-beta-glycanase		Q9Z3Q2
SMa1589		CDS	2.95549	0.00387636			P.II	VI.C Hypothetical/Global homology	conserved hypothetical protein		Q92YL1
SMa1595		CDS	3.51938	0.000512143	4.25296	0.000512143	P.I	VI.D Unknown	hypothetical protein		Q92YK6
SMa1597		CDS	1.31271	0.0009592	1.74072	0.000512143	P.I	III.A.2 surface structures	Pilus assembly chaperone	K07346	Q92YK5
SMa1600		CDS	1.13375	0.00632638			P.II	IV.D Transport of small molecules	Potassium efflux protein	K03455	Q92YK4
SMa1635		CDS			1.8161	0.000512143	P.III	VI.C Hypothetical/Global homology	hypothetical protein		Q92YI9
SMa1641		CDS			-1.34748	0.00482954	P.III	IV.D Transport of small molecules	Permease,MFS		Q92YI4
SMa1660		CDS	1.55326	0.00176271	1.91086	0.000512143	P.I	I Small Molecule Metabolism	conserved hypothetical protein		Q92YH1
SMa1668	arcD2	CDS	2.53713	0.000512143	1.34483	0.00544021	P.I	IV.D.2 amino acids, amines, peptides	ArcD2 arginine/ornithine antiporter	K03758	Q92YG6
SMa1670	arcA2	CDS	3.28969	0.00213505	2.23085	0.000512143	P.I	I.I.3 amino acids	ArcA2 arginine deiminase	K01478	Q92YG5
SMa1676		CDS	2.01494	0.00320928			P.II	VI.C Hypothetical/Global homology	conserved hypothetical protein	K11744	Q92YG1
SMa1677		CDS	2.26088	0.000512143	1.89291	0.000512143	P.I	I Small Molecule Metabolism	Metallo-dependent hydrolase		Q92YG0
SMa1680		CDS	1.91776	0.00137247			P.II	VI.C Hypothetical/Global homology	conserved hypothetical protein		Q92YF8
SMa1682		CDS			1.95339	0.00632638	P.III	I Small Molecule Metabolism	nonspecific acid phosphatase precursor		Q92YF7
SMa1683		CDS	3.5033	0.000512143	2.91632	0.000512143	P.I	I Small Molecule Metabolism	Arylsulfatase	K01130	Q92YF6
SMa1684		CDS			1.32459	0.000512143	P.III	VI.A Not classified regulator	Sensory histidine kinase		Q92YF5
SMa1686		CDS			1.42948	0.0091608	P.III	VI.A Not classified regulator	Two-component response regulator		Q92YF4
SMa1696		CDS	1.78529	0.000512143	1.96793	0.000512143	P.I	VI.A Not classified regulator	Sensor histidine kinase		Q92YE9
SMa1697		CDS	-1.26869	0.000512143			P.II	VI.C Hypothetical/Global homology	conserved hypothetical protein		Q92YE8
SMa1698	syrB1	CDS	-1.06718	0.00354496			P.II	VI.A Not classified regulator	SyrB1 regulator	K07497	O33685
SMa1705		CDS	4.92579	0.00387636			P.II	VI.A Not classified regulator	Transcriptional regulator,MucR family		O33682
SMa1731	betB2	CDS			1.59628	0.00661481	P.III	I.A Amino acid biosynthesis	BetB2 betaine aldehyde dehydrogenase	K00130	Q92YD2
SMa1749		CDS			-1.36384	0.00137247	P.III	VI.A Not classified regulator	putative transcriptional regulator		Q92YC0
SMa1751		CDS	-1.38454	0.00213505			P.II	IV.D Transport of small molecules	ABC transporter,permease	K02053	Q92YB8
SMa1755		CDS	-1.49713	0.000512143			P.II	IV.D Transport of small molecules	ABC transporter,periplasmic solute-binding protein	K02055	Q92YB5
SMa1757		CDS	-1.79435	0.000512143			P.II	I.F.6 nitrogen fixation	short chain alcohol dehydrogenase-related dehydrogenase	K00059	Q92YB4
SMa1760		CDS	-1.41257	0.000512143			P.II	I Small Molecule Metabolism	phosphotransferase		Q92YB2
SMa1765		CDS	4.97713	0.000512143	4.13995	0.000512143	P.I	VI.C Hypothetical/Global homology	conserved hypothetical protein		Q92YB0
SMa1766		CDS	4.44851	0.000512143	3.65452	0.000512143	P.I	VI.B Hypothetical/Partial homology	conserved hypothetical protein		Q92YA9
SMa1793		CDS	2.01111	0.00176271			P.II	VI.C Hypothetical/Global homology	conserved hypothetical protein		Q92Y95
SMa1797		CDS	1.712	0.00573901	1.62957	0.00137247	P.I	VI.D Unknown	Hypothetical protein		Q92Y94
SMa1808		CDS	2.68802	0.000512143	2.57989	0.000512143	P.I	VI.D Unknown	Hypothetical protein		Q92Y91
SMa1809		CDS	2.52936	0.000512143	3.13379	0.000512143	P.I	IV.G Protection responses	Non-heme haloperoxidase	K00433	Q92Y90
SMa1811		CDS	2.54518	0.000512143	3.22355	0.000512143	P.I	VI.C Hypothetical/Global homology	conserved hypothetical protein		Q92Y89
SMa1814		CDS	2.35407	0.000512143	2.77856	0.000512143	P.I	I.I.4 carbon compounds	conserved hypothetical protein		Q92Y88
SMa1817		CDS			3.00716	0.00213505	P.III	VI.C Hypothetical/Global homology	conserved hypothetical protein		Q92Y87
SMa1819		CDS	2.65105	0.000512143	3.26644	0.000512143	P.I	VI.C Hypothetical/Global homology	Conserved hypothetical protein		Q92Y86
SMa1821		CDS	2.88138	0.000512143	3.31288	0.000512143	P.I	I Small Molecule Metabolism	hydrolase		Q92Y84
SMa1822		CDS	1.91964	0.000512143	2.89155	0.000512143	P.I	VI.C Hypothetical/Global homology	conserved hypothetical protein		Q92Y83
SMa1833		CDS			1.11751	0.00861167	P.III	I Small Molecule Metabolism	dehydrogenase		Q92Y77
SMa1838		CDS	2.8795	0.00544021			P.II	I Small Molecule Metabolism	dehydrogenase	K12972	Q92Y74
SMa1850		CDS			1.29758	0.00995897	P.III	I Small Molecule Metabolism	oxidoreductase		Q92Y69
SMa1853		CDS	2.12225	0.00544021			P.II	VI.C Hypothetical/Global homology	conserved hypothetical protein		Q92Y67
SMa1857		CDS	1.4171	0.00452512			P.II	I Small Molecule Metabolism	hydrolase	K07025	Q92Y65
SMa1860		CDS	1.4185	0.000512143			P.II	IV.D Transport of small molecules	ABC transporter,periplasmic solute-binding protein	K02035	Q92Y64
SMa1881		CDS	1.44115	0.00176271	1.30563	0.00482954	P.I	VI.D Unknown	Hypothetical protein		Q92Y54
SMa1916		CDS	2.15274	0.00452512			P.II	IV.D Transport of small molecules	Permease		Q92Y36
SMa1921		CDS	1.03711	0.00861167	2.03457	0.000512143	P.I	VI.D Unknown	Hypothetical protein		Q92Y32
SMa1929		CDS			-1.59764	0.00420562	P.III	VI.C Hypothetical/Global homology	conserved hypothetical protein		Q92Y29
SMa1933		CDS			1.4457	0.0009592	P.III	VI.A Not classified regulator	Transcriptional regulator,LysR family		Q92Y28
SMa1948		CDS	1.50444	0.00602255			P.II	VI.A Not classified regulator	Transcriptional regulator,CAP/Crp family		Q92Y22
SMa1959		CDS	1.35975	0.00995897			P.II	VI.C Hypothetical/Global homology	conserved hypothetical protein		Q92Y15
SMa1961		CDS	1.32884	0.000512143	2.78405	0.000512143	P.I	I.I.4 carbon compounds	polyhydroxybutyrate depolymerase		Q92Y13
SMa1963		CDS			1.34698	0.00749637	P.III	I Small Molecule Metabolism	O-Methyltransferase		Q92Y12
SMa1968		CDS	1.83914	0.00137247			P.II	I Small Molecule Metabolism	amidotransferase		Q92Y08
SMa1976		CDS			1.29529	0.00661481	P.III	I Small Molecule Metabolism	epimerase/aldolase		Q92Y03
SMa2002		CDS	-1.58666	0.0009592			P.II	I Small Molecule Metabolism	hydrolase		Q92XZ1
SMa2012		CDS	1.48718	0.00137247			P.II	VI.C Hypothetical/Global homology	conserved hypothetical protein		Q92XY6
SMa2015		CDS	-2.45819	0.00602255			P.II	VI.A Not classified regulator	hypothetical protein		Q92XY4
SMa2019		CDS	-1.22496	0.00285916			P.II	VI.B Hypothetical/Partial homology	hypothetical protein		Q92XY3
SMa2020		CDS	-1.01037	0.00777209			P.II	VI.A Not classified regulator	Transcriptional regulator	K23775	Q92XY2
SMa2033		CDS			1.47679	0.00544021	P.III	VI.C Hypothetical/Global homology	Transglycosylase		Q92XX5
SMa2034		CDS			1.0579	0.00544021	P.III	VI.C Hypothetical/Global homology	conserved hypothetical protein	K03636	Q92XX4
SMa2059		CDS	2.12157	0.00749637			P.II	VI.D Unknown	hypothetical protein		Q92XW5
SMa2061		CDS	4.97164	0.000512143	2.32451	0.000512143	P.I	VI.C Hypothetical/Global homology	conserved hypothetical protein	K08482	Q92XW4
SMa2063		CDS	3.81571	0.000512143	2.30828	0.00861167	P.I	VI.A Not classified regulator	Sensor histidine kinase		Q92XW3
SMa2067	cysA1	CDS			1.49214	0.000512143	P.III	IV.D.1 anions	Sulfate/thiosulfate import ATP-binding protein	K02045	Q92XW1
SMa2069	cysP1	CDS	1.73413	0.000512143	2.52306	0.000512143	P.I	IV.D.1 anions	Bacterial extracellular solute-binding protein,family 1	K02048	Q92XW0
SMa2071		CDS	6.07664	0.00602255			P.II	VI.D Unknown	Hypothetical protein		Q92XV9
SMa2075		CDS			-2.63904	0.000512143	P.III	IV.D Transport of small molecules	ABC transporter,periplasmic solute-binding protein	K02035	Q92XV7
SMa2077		CDS			-1.35068	0.00832418	P.III	I Small Molecule Metabolism	Oxidoreductase	K05882	Q92XV6
SMa2103		CDS	2.25835	0.00320928			P.II	I Small Molecule Metabolism	oxidoreductase		Q92XU3
SMa2109		CDS	1.38842	0.00387636	1.23472	0.0091608	P.I	VI.C Hypothetical/Global homology	conserved hypothetical protein		Q92XU0
SMa2133		CDS	1.29403	0.00573901	1.14834	0.00602255	P.I	VI.A Not classified regulator	hypothetical protein		Q92XS9
SMa2165		CDS	2.48229	0.00213505			P.II	I Small Molecule Metabolism	short chain alcohol dehydrogenase-related dehydrogenase		Q92XR5
SMa2169		CDS	2.47377	0.00137247			P.II	VI.D Unknown	hypothetical protein		Q92XR3
SMa2197		CDS	1.19837	0.00320928			P.II	IV.D Transport of small molecules	ABC transporter,permease	K02029	Q92XQ8
SMa2235		CDS	-1.03048	0.00805017	-1.09005	0.00452512	P.I	VI.B Hypothetical/Partial homology	hypothetical protein		Q92XN9
SMa2241		CDS			-1.10698	0.00250247	P.III	VI.C Hypothetical/Global homology	conserved hypothetical protein		Q92XN6
SMa2243		CDS	-2.04526	0.000512143	-1.97188	0.000512143	P.I	VI.C Hypothetical/Global homology	conserved hypothetical protein		Q92XN5
SMa2245		CDS	-1.42918	0.0009592	-1.29793	0.0009592	P.I	VI.C Hypothetical/Global homology	Conserved hypothetical protein		Q92XN4
SMa2297		CDS	4.86857	0.000512143			P.II	VI.B Hypothetical/Partial homology	hypothetical protein		Q92XK7
SMa2299		CDS	4.74969	0.00213505			P.II	VI.B Hypothetical/Partial homology	hypothetical protein		Q92XK6
SMa2301		CDS	2.11939	0.00176271			P.II	VI.A Not classified regulator	Diguanylate cyclase		Q92XK5
SMa2329	kdpC	CDS	4.70396	0.00513758			P.II	IV.D.4 cations	KdpC potassium-transporting ATPase C chain	K01548	Q92XJ1
SMa2331	kdpB	CDS	4.58607	0.000512143			P.II	IV.D.4 cations	KdpB potassium-transporting ATPase B chain	K01547	Q92XJ0
SMa2333	kdpA	CDS	5.71684	0.000512143			P.II	IV.D.4 cations	KdpA potassium-transporting ATPase A chain	K01546	Q92XI9
SMa2339		CDS			-1.74859	0.00861167	P.III	IV.D Transport of small molecules	Siderophore biosynthesis protein	K03896	Q92XI6
SMa2347		CDS	-1.4485	0.000512143			P.II	VI.C Hypothetical/Global homology	conserved hypothetical protein	K15256	Q92XI2
SMa2349		CDS	4.81842	0.00137247			P.II	I Small Molecule Metabolism	oxidoreductase	K13483	Q92XI1
SMa2351		CDS	3.78014	0.000512143			P.II	I Small Molecule Metabolism	oxidoreductase	K11178	Q92XI0
SMa2353		CDS	3.82465	0.000512143	3.19274	0.000512143	P.I	I Small Molecule Metabolism	oxidoreductase	K11177	Q92XH9
SMa2355	dinB2	CDS			1.44075	0.000512143	P.III	II.B.8 DNA - replication, repair, restr./modif.	DNA polymerase IV	K02346	Q92XH8
SMa2359		CDS	1.49005	0.0069235			P.II	VI.C Hypothetical/Global homology	conserved hypothetical protein	K07090	Q92XH6
SMa2361		CDS	-1.26684	0.000512143	-1.32321	0.000512143	P.I	VI.C Hypothetical/Global homology	conserved hypothetical protein	K07335	Q92XH5
SMa2363		CDS			-1.80719	0.00420562	P.III	I Small Molecule Metabolism	Amidase	K01426	Q92XH4
SMa2371	codA	CDS	-1.70073	0.000512143			P.II	I.F.9 nucleotide interconversions	CodA cytosine deaminase	K01485	Q92XH0
SMa2377		CDS	1.60857	0.000512143			P.II	IV.D Transport of small molecules	Permease,MFS		Q92XG9
SMa2379	katB	CDS			1.38023	0.000512143	P.III	IV.G.4 detoxification	KatB catalase/peroxidase	K03782	Q92XG8
SMa2383		CDS			-1.38545	0.00176271	P.III	I Small Molecule Metabolism	Dehydrogenase,Zn-dependent	K00344	Q92XG6
SMa2389		CDS			1.6074	0.00995897	P.III	IV.F Adaptation	OsmC-like protein	K04063	Q92XG3
SMa2410	rhbF	CDS			-2.25626	0.00285916	P.III	IV.D.5 incorporation metal ions	RhbF rhizobactin biosynthesis protein	K03895	Q9Z3Q7
SMa2414	rhtA	CDS			-2.44529	0.000512143	P.III	VI.A Not classified regulator	RhtA rhizobactin transporter	K02014	Q9Z3Q5
SMa5002		CDS	6.389	0.000512143	3.37233	0.00137247	P.I	VI.C Hypothetical/Global similarity	conserved hypothetical protein		B3KLW3
SMa5006		CDS			1.05797	0.00805017	P.III	VI.C Hypothetical/Global homology	conserved hypothetical protein		B3KLY2
SMa5026		CDS	2.90432	0.00354496			P.II	VI.C Hypothetical/Global homology	conserved hypothetical protein		B3KLX4
SMa5027		CDS	4.88595	0.00513758	1.62258	0.00832418	P.I	VI.D Unknown	hypothetical protein		B3KLX5
SMa5028		CDS	-2.93487	0.0009592			P.II	VI.C Hypothetical/Global similarity	hypothetical protein		B3KLX7
SMa6000		ncRNA			2.1072	0.000512143	P.III
SMa6001		CDS	1.97737	0.000512143	2.00388	0.000512143	P.I
SMa6007		CDS	2.47864	0.000512143	1.73704	0.0069235	P.I
SMa6036		CDS			1.9997	0.00661481	P.III
SMa6155		ncRNA			2.11463	0.000512143	P.III
SMa6415		ncRNA	1.83126	0.000512143	1.73911	0.000512143	P.I
SMa6506		ncRNA	1.98566	0.000512143	3.0449	0.000512143	P.I		aR14
SMa7020		ncRNA	-5.71638	0.000512143			P.II
SMb20003		CDS	-1.26306	0.00137247			P.II	I.A.16 proline	Pyrroline-5-carboxylate reductase	K00286	Q92XF5
SMb20005	gst15	CDS	2.29297	0.00889017			P.II	VI MISCELLANEOUS	Putative glutathione S-transferase	K00799	Q92XF3
SMb20006		CDS			2.73724	0.00632638	P.III	VI.B Hypothetical/Partial homology	Hypothetical protein,FMN-binding domain	K07006	Q92XF2
SMb20007	katC	CDS	3.48619	0.000512143			P.II	IV.G.4 detoxification	Catalase	K03781
SMb20010		CDS	1.91672	0.00995897			P.II	VI.C Hypothetical/Global similarity	Hypothetical protein		Q92XE9
SMb20018		CDS	-1.77741	0.000512143			P.II	IV.D.3 carbohydrates, organic acids, alcohols	Probable sugar ABC transporter,ATP-binding protein	K10439	Q92XE1
SMb20020	pdh	CDS	-1.59145	0.000512143			P.II	I.H.6 TCA cycle	Pyruvate dehydrogenase (acetyl-transferring)	K11381	Q92XD9
SMb20022		CDS			1.17005	0.0091608	P.III	VI.C Hypothetical/Global homology	Conserved hypothetical protein		Q92XD7
SMb20023		CDS	-1.13243	0.00387636			P.II	I Small Molecule Metabolism	Probable 5-oxoprolinase	K01469	Q92XD6
SMb20025		CDS	-2.11704	0.000512143			P.II	VI.C Hypothetical/Global similarity	Conserved hypothetical protein	K07795	Q92XD4
SMb20026		CDS	-1.92948	0.000512143			P.II	VI.C Hypothetical/Global similarity	Conserved hypothetical protein	K07794	Q92XD3
SMb20027		CDS	-2.32878	0.000512143			P.II	VI.C Hypothetical/Global homology	Conserved hypothetical protein	K07793	Q92XD2
SMb20033		CDS	-1.49274	0.000512143			P.II	VI.A Not classified regulator	Transcription regulator,TetR family		Q92XC6
SMb20036		CDS	-3.22208	0.000512143			P.II	IV.D.3 carbohydrates, organic acids, alcohols	Putative TRAP-type quinic acid transporter,periplasmic solute-binding protein	K21395	Q92XC3
SMb20037	aroE2	CDS	-2.19569	0.00285916			P.II	I.A.5 chorismate	Putative shikimate 5-dehydrogenase	K00014	Q92XC2
SMb20042		CDS	-1.34547	0.000512143			P.II	VI.C Hypothetical/Global homology	Conserved hypothetical protein		Q92XB7
SMb20043		CDS	-1.50605	0.000512143			P.II	VI.C Hypothetical/Global similarity	Hypothetical protein		Q92XB6
SMb20046	repA1	CDS	-1.60726	0.000512143			P.II	II.B.8 DNA - replication, repair, restr./modif.	Probable replication protein A		Q92XB3
SMb20049	fusA2	CDS			1.13045	0.00452512	P.III	II.B.7 proteins and peptides - translation and modification	Putative elongation factor G	K02355	Q92XB0
SMb20055		CDS			1.34531	0.0009592	P.III	VI.A Not classified regulator	Putative transcriptional regulator		Q92XA7
SMb20066		CDS	2.1532	0.00720208			P.II	VI.C Hypothetical/Global similarity	Hypothetical protein		Q92X96
SMb20068		CDS	1.35189	0.000512143	2.69147	0.000512143	P.I	VI.C Hypothetical/Global homology	Hypothetical protein	K09165	Q92X94
SMb20069		CDS	-1.79889	0.000512143			P.II	IV.D.2 amino acids, amines, peptides	Probable Na+/aminoacid symporter	K03310	Q92X93
SMb20070		CDS	-1.2684	0.000512143			P.II	IV.D Transport of small molecules	Putative sulfate permease	K03321	Q92X92
SMb20071		CDS	2.8714	0.00720208			P.II	IV.D Transport of small molecules	Putative efflux protein		Q92X91
SMb20073		CDS	2.15269	0.00137247	2.2534	0.0009592	P.I	I Small Molecule Metabolism	short chain alcohol dehydrogenase/reductase involved in D-fucose,lysine,leucine and proline utilization		Q92X89
SMb20076		CDS	3.66568	0.00250247			P.II	I Small Molecule Metabolism	short chain alcohol dehydrogenase/reductase involved in D-fucose,lysine,leucine and proline utilization		Q92X86
SMb20079		CDS	2.41414	0.000512143	2.28329	0.000512143	P.I	VI MISCELLANEOUS	Putaive haemolysin-type calcium-binding protein		Q92X83
SMb20080		CDS	2.42378	0.000512143	1.72409	0.0009592	P.I	I Small Molecule Metabolism	Formaldehyde dehydrogenase (glutathione)		Q92X82
SMb20094		CDS	2.10639	0.00250247			P.II	I Small Molecule Metabolism	Phospholipase D	K01115	Q92X68
SMb20097		CDS	1.651	0.0009592	2.18342	0.000512143	P.I	I Small Molecule Metabolism	Hypothetical oxidoreductase protein	K00594	Q92X65
SMb20099		CDS	1.83122	0.000512143	2.0257	0.000512143	P.I	I.F Central intermediary metabolism	Putative trehalose synthase	K05343	Q92X63
SMb20100		CDS			2.16742	0.000512143	P.III	I Small Molecule Metabolism	Putative dehydrogenase		Q92X62
SMb20102	acoR	CDS			1.26014	0.000512143	P.III	I Small Molecule Metabolism	Putative acetoin catabolism regulatory protein	K21405	Q92X60
SMb20103		CDS			2.99781	0.000512143	P.III	I Small Molecule Metabolism	Probable FAD-dependent oxidoreductase	K07222	Q92X59
SMb20104		CDS			2.05004	0.000512143	P.III	VI.C Hypothetical/Global homology	Hypothetical membrane protein	K07090	Q92X58
SMb20105		CDS	-1.50615	0.000512143			P.II	VI.A Not classified regulator	Putative transcriptional regulator		Q92X57
SMb20107		CDS	-2.88708	0.000512143			P.II	VI.C Hypothetical/Global homology	Conserved hypothetical protein		Q92X55
SMb20108		CDS	-1.93207	0.000512143			P.II	IV.D.2 amino acids, amines, peptides	Putative ABC transporter periplasmic oligopeptide-binding protein	K02035	Q92X54
SMb20116		CDS	3.18111	0.000512143	1.62465	0.00137247	P.I	VI.C Hypothetical/Global similarity	Conserved hypothetical protein		Q92X46
SMb20117		CDS	2.83135	0.000512143			P.II	III.A.1 surface polysaccharides/antigens	Hypothetical sugar transferase protein	K12995	Q92X45
SMb20118		CDS	1.74513	0.000512143	1.18515	0.00387636	P.I	VI.C Hypothetical/Global homology	Conserved hypothetical protein		Q92X44
SMb20123		CDS			1.1629	0.00832418	P.III	VI.A Not classified regulator	Putative transcriptional regulator		Q92X39
SMb20126	ttpB	CDS			3.24675	0.00137247	P.III	IV.D.2 amino acids, amines, peptides	Putative ABC transporter of tri and tetrapeptides,permease component	K23535	Q92X36
SMb20127		CDS	2.1479	0.00213505			P.II	IV.D.6 nucleosides, purines pyrimidines	Putative xanthine and xanthosine ABC transporter,periplasmic solute-binding protein	K07335	Q92X35
SMb20133		CDS	2.0689	0.0009592			P.II	VI.C Hypothetical/Global homology	Conserved hypothetical protein		Q92X29
SMb20161		CDS	1.83573	0.000512143	1.68976	0.000512143	P.I	VI.D Unknown	Hypothetical protein		Q92X01
SMb20164		CDS	-1.35686	0.00213505			P.II	VI.A Not classified regulator	Putative two-component sensor histidine kinase containing a receiver domain		Q92WZ8
SMb20165		CDS	2.40968	0.000512143	2.45123	0.00213505	P.I	VI.C Hypothetical/Global homology	Conserved hypothetical protein,signal peptide		Q92WZ7
SMb20167		CDS	1.21523	0.00137247	1.71354	0.000512143	P.I	VI.C Hypothetical/Global homology	Conserved hypothetical protein,signal peptide	K17226	Q92WZ5
SMb20168		CDS	2.09734	0.000512143	1.45641	0.00176271	P.I	VI.C Hypothetical/Global homology	Conserved hypothetical protein		Q92WZ4
SMb20169		CDS	1.5963	0.000512143	1.4646	0.00137247	P.I	VI.C Hypothetical/Global homology	Hypothetical protein		Q92WZ3
SMb20171		CDS	4.9442	0.000512143	4.63206	0.000512143	P.I	IV.G.4 detoxification	Putative S-formylglutathione hydrolase	K01070	Q92WZ1
SMb20172		CDS	5.13186	0.000512143	4.67085	0.000512143	P.I	I.G.1 electron transport	Putative cytochrome c	K08738	Q92WZ0
SMb20173		CDS	4.2502	0.000512143	3.03422	0.000512143	P.I	I.I.4 carbon compounds	Putative methanol dehydrogenase protein,large subunit	K23995	Q92WY9
SMb20174		CDS	3.40546	0.000512143	2.24514	0.00354496	P.I	I.G.1 electron transport	Putative cytochrome c		Q92WY8
SMb20175		CDS	2.70959	0.000512143			P.II	VI.C Hypothetical/Global homology	Hypothetical protein		Q92WY7
SMb20177		CDS	2.88618	0.000512143	4.10238	0.0091608	P.I	VI.C Hypothetical/Global homology	Conserved hypothetical protein,signal peptide		Q92WY5
SMb20178		CDS	3.41879	0.000512143	2.72067	0.00720208	P.I	VI.C Hypothetical/Global homology	Hypothetical protein		Q92WY4
SMb20179		CDS	2.37132	0.000512143			P.II	VI.C Hypothetical/Global homology	Conserved hypothetical protein		Q92WY3
SMb20180		CDS	2.19498	0.00632638	2.33429	0.00944057	P.I	VI.B Hypothetical/Partial homology	Hypothetical protein		Q92WY2
SMb20186	gfa	CDS	5.30531	0.000512143	4.73224	0.000512143	P.I	I.I.4 carbon compounds	Glutathione-dependent formaldehyde-activating enzyme	K03396
SMb20204	pqqA	CDS	4.7444	0.000512143	4.84556	0.000512143	P.I	I.B Biosynthesis of cofactors, carriers	Putative pyrroloquinoline quinone synthesis protein A
SMb20212		CDS	2.98591	0.000512143	3.26874	0.000512143	P.I	VI.C Hypothetical/Global similarity	Hypothetical protein		Q92WX2
SMb20213		CDS	2.43909	0.000512143	2.1135	0.0009592	P.I	VI.C Hypothetical/Global homology	Conserved hypothetical protein		Q92WX1
SMb20216		CDS			1.54139	0.00137247	P.III	IV.F.1 adaptations, atypical conditions	Epoxide hydrolase		Q92WW8
SMb20229	ndiB	CDS	2.4788	0.000512143			P.II	IV.F.1 adaptations, atypical conditions	Putative nutrient deprivation-induced protein		Q7ANS7
SMb20234		CDS	-1.52532	0.000512143			P.II	VI.C Hypothetical/Global homology	Hypothetical protein		Q92WV4
SMb20235		CDS	-1.78039	0.000512143			P.II	IV.D.3 carbohydrates, organic acids, alcohols	Putative sugar ABC transporter ATP-binding protein	K10112	Q92WV3
SMb20246		CDS	2.46874	0.00482954			P.II	I Small Molecule Metabolism	Putative oxidoreductase		Q92WU3
SMb20248		CDS	1.58592	0.00749637			P.II	VI.C Hypothetical/Global similarity	Hypothetical protein		Q92WU1
SMb20249		CDS	2.80181	0.00544021			P.II	I Small Molecule Metabolism	Putative myo-inositol-1-phosphate synthase	K01858	Q92WU0
SMb20255		CDS	2.31105	0.0009592	3.26002	0.00320928	P.I	VI.C Hypothetical/Global homology	Hypothetical protein		Q92WT4
SMb20256		CDS			2.19709	0.000512143	P.III	VI.C Hypothetical/Global homology	Conserved hypothetical protein		Q92WT3
SMb20257	cyaM	CDS	1.27696	0.00387636	1.53293	0.0009592	P.I	I.E.1 global regulatory functions	Adenylate cyclase	K01768	Q92WT2
SMb20261	hypS	CDS			1.09086	0.00320928	P.III	I Small Molecule Metabolism	Malate dehydrogenase	K13609	Q92WS8
SMb20263	hypM	CDS	-2.84184	0.000512143	-2.14878	0.000512143	P.I	IV.D.2 amino acids, amines, peptides	ABC transporter periplasmic hydroxyproline-binding protein	K23061	Q92WS6
SMb20264	hypN	CDS			-2.66867	0.000512143	P.III	IV.D.2 amino acids, amines, peptides	Hydroxyproline ABC transporter,permease component	K23062	Q92WS5
SMb20266	hypQ	CDS	-2.42957	0.000512143	-1.81759	0.000512143	P.I	IV.D.2 amino acids, amines, peptides	Hydroxyproline ABC transporter ATP-binding protein	K23064	Q92WS3
SMb20272		CDS			1.7845	0.00320928	P.III	VI.C Hypothetical/Global similarity	Putative transporter		Q92WR7
SMb20278		CDS			1.68828	0.000512143	P.III	VI.C Hypothetical/Global homology	Conserved hypothetical protein		Q92WR1
SMb20279		CDS	1.04753	0.00970149	1.13312	0.00176271	P.I	VI.B Hypothetical/Partial homology	Hypothetical protein		Q92WR0
SMb20294		CDS	-1.50521	0.00176271			P.II	VI.A Not classified regulator	Putative transcriptional regulator	K22104	Q92WP5
SMb20295		CDS	-1.95625	0.000512143			P.II	IV.D.3 carbohydrates, organic acids, alcohols	Putative TRAP-type dicarboxylate transporter,periplasmic solute-binding component		Q92WP4
SMb20299	nanA	CDS	-1.39746	0.000512143			P.II	I.F.8 amino sugars	N-acetylneuraminate lyase	K01639
SMb20300	cyaF7	CDS	3.1313	0.000512143	1.94046	0.000512143	P.I	I.E.1 global regulatory functions	Putative adenylate cyclase	K01768	Q92WN9
SMb20307		CDS			1.1167	0.00285916	P.III	I.F.11 misc. glycerol metabolism	Putative phosphatase domain of dihydroxyacetone kinase	K05879	Q92WN5
SMb20314		CDS	-1.7857	0.00452512			P.II	I.F.11 misc. glycerol metabolism	Glycerone kinase	K05878	Q92WN2
SMb20316		CDS	-2.21694	0.000512143	-1.19065	0.00513758	P.I	IV.D.3 carbohydrates, organic acids, alcohols	Putative erythritol ABC transporter,periplasmic solute-binding protein	K02058	Q92WN0
SMb20317		CDS	-1.81077	0.000512143	-1.32647	0.0009592	P.I	IV.D.3 carbohydrates, organic acids, alcohols	Putative erythritol ABC transporter,ATP-binding protein	K02056	Q92WM9
SMb20318		CDS	-1.58415	0.0009592	-1.50335	0.00213505	P.I	IV.D.3 carbohydrates, organic acids, alcohols	Putative erythritol ABC transporter,permease component	K02057	Q92WM8
SMb20321		CDS	2.24143	0.000512143			P.II	IV.D.2 amino acids, amines, peptides	Trap-type large permease component,may be involved in transport of hydroxyproline		Q92WM5
SMb20323		CDS	-1.77484	0.000512143			P.II	VI.A Not classified regulator	Putative transcriptional regulator		Q92WM3
SMb20333	betT	CDS			1.32014	0.00213505	P.III	IV.D.3 carbohydrates, organic acids, alcohols	Choline-glycine betaine transporter induced by an osmotic shock	K02168	Q92WM0
SMb20342		CDS			1.74324	0.000512143	P.III	I Small Molecule Metabolism	Putative isoquinoline 1-oxidoreductase	K07303	Q92WL1
SMb20343		CDS			1.55866	0.000512143	P.III	I Small Molecule Metabolism	Putative isoquinoline 1-oxidoreductase	K07302	Q92WL0
SMb20345		CDS	-1.91872	0.000512143			P.II	IV.G.2 drug/analog sensitivity and resistance	Probable acriflavine family protein		Q92WK8
SMb20349		CDS	-1.97975	0.000512143			P.II	IV.D.3 carbohydrates, organic acids, alcohols	ABC transporter,periplasmic solute-binding protein,possible erythritol transport protein	K17202	Q92WK4
SMb20356		CDS			1.98334	0.000512143	P.III	VI.A Not classified regulator	Putative two-component sensor histidine kinase		Q92WJ7
SMb20358	cyaL	CDS	1.97428	0.000512143	1.71635	0.0009592	P.I	I.E.1 global regulatory functions	Adenylate/guanylate cyclase		Q92WJ5
SMb20359		CDS	3.72551	0.000512143	2.16633	0.0009592	P.I	VI.C Hypothetical/Global similarity	Hypothetical protein		Q92WJ4
SMb20360		CDS	2.44293	0.00250247			P.II	VI.C Hypothetical/Global similarity	Hypothetical protein		Q92WJ3
SMb20362		CDS			1.49711	0.00137247	P.III	I.E.1 global regulatory functions	Inositol-phosphate phosphatase	K01092	Q92WJ1
SMb20371		CDS	-1.3337	0.00832418			P.II	I.F Central intermediary metabolism	Putative ribose-5-phosphate isomerase	K01808	Q92WI2
SMb20387		CDS	-2.81077	0.00513758			P.II	VI.A Not classified regulator	Putative transcriptional regulator		Q92WG6
SMb20388		CDS	1.67244	0.000512143	2.21101	0.000512143	P.I	I.G.1 electron transport	Putative NADPH:quinone oxidoreductase	K00344	Q92WG5
SMb20389		CDS			1.91816	0.000512143	P.III	VI.A Not classified regulator	Diguanylate cyclase		Q92WG4
SMb20393	rbcL	CDS	-2.00191	0.0009592			P.II	I.H Energy metabolism, carbon	Putative ribulose bisphosphate carboxylaseoxygenase,large subunit	K24268	Q92WG0
SMb20394		CDS	-1.58121	0.00320928	-1.68925	0.00213505	P.I	VI.C Hypothetical/Global homology	Conserved hypothetical protein	K23247	Q92WF9
SMb20404		CDS	1.63399	0.00749637			P.II	I Small Molecule Metabolism	Putative aldehyde dehydrogenase	K18030	Q92WF0
SMb20407	hyuB	CDS	1.57633	0.000512143	2.28424	0.000512143	P.I	I.F.14 amino acids	5-oxoprolinase (ATP-hydrolysing)	K10854	Q92WE7
SMb20410		CDS	1.40212	0.00573901			P.II	IV.D.2 amino acids, amines, peptides	ABC transporter,periplasmic solute-binding protein,induced by mannose and dulcitol	K02002	Q92WE4
SMb20414		CDS	2.02635	0.00137247			P.II	VI.C Hypothetical/Global similarity	Hypothetical protein		Q92WE0
SMb20416	ugpB	CDS			1.24412	0.0009592	P.III	IV.D.3 carbohydrates, organic acids, alcohols	Probable ABC transporter periplasmic glycerol-3-phosphate-binding protein precursor	K05813
SMb20420		CDS	-1.41828	0.000512143			P.II	VI MISCELLANEOUS	Glutathione transferase	K00799	Q92WD5
SMb20436		CDS			-2.85152	0.000512143	P.III	IV.D.3 carbohydrates, organic acids, alcohols	Probable nitrate transporter	K02575	Q92WC1
SMb20447		CDS	1.07644	0.00777209			P.II	VI.A Not classified regulator	Diguanylate cyclase/phosphodiesterase		Q92WB4
SMb20454		CDS	5.14306	0.000512143			P.II	VI.C Hypothetical/Global homology	Conserved hypothetical protein		Q92WA8
SMb20465		CDS	1.579	0.00573901			P.II	VI.C Hypothetical/Global homology	Conserved hypothetical protein		Q92W98
SMb20473		CDS			1.73822	0.00250247	P.III	VI.C Hypothetical/Global homology	Hypothetical protein		Q92W90
SMb20476		CDS			1.57712	0.000512143	P.III	IV.D.2 amino acids, amines, peptides	Putative ABC transporter periplasmic dipeptide-binding protein	K02035	Q92W87
SMb20481	asnO	CDS	-1.03945	0.00720208			P.II	I.A.14 asparagine	Asparagine synthase	K01953	Q92W82
SMb20482		CDS	-1.47283	0.000512143			P.II	VI.C Hypothetical/Global homology	Conserved hypothetical protein		Q92W81
SMb20483		CDS	-1.44382	0.000512143	-1.19976	0.00176271	P.I	VI.A Not classified regulator	Probable transcription regulator,LacI family	K03435	Q92W80
SMb20484	supA	CDS	-1.76259	0.000512143			P.II	IV.D.3 carbohydrates, organic acids, alcohols	Putative ABC transporter periplasmic sugar-binding protein	K02058	Q92W79
SMb20485	supB	CDS	-2.89508	0.00137247			P.II	IV.D.3 carbohydrates, organic acids, alcohols	Putative sugar ABC transporter ATP-binding protein	K02056	Q92W78
SMb20488		CDS	-2.41022	0.000512143			P.II	I Small Molecule Metabolism	Putative isomerase	K18910	Q92W75
SMb20489		CDS	-2.81156	0.000512143			P.II	I.H Energy metabolism, carbon	Probable carbohydrate kinase		Q92W74
SMb20490	fucA2	CDS	-2.1508	0.000512143			P.II	I.I.4 carbon compounds	L-fuculose-phosphate aldolase	K01628	Q92W73
SMb20495		CDS	1.48293	0.00861167			P.II	VI.C Hypothetical/Global homology	Conserved hypothetical protein		Q92W68
SMb20508		CDS	-1.64195	0.00213505			P.II	IV.D.3 carbohydrates, organic acids, alcohols	Probable sugar ABC transporter,periplasmic solute-binding protein,putative arabinose transporter	K10537	Q92W55
SMb20509		CDS	-1.7559	0.000512143			P.II	VI.A Not classified regulator	Putative transcriptional regulator		Q92W54
SMb20517		CDS	1.15826	0.00632638	2.14543	0.000512143	P.I	VI.B Hypothetical/Partial homology	Hypothetical protein		Q92W47
SMb20532		CDS			2.34887	0.00602255	P.III	VI.C Hypothetical/Global homology	Conserved hypothetical transmembrane protein,signal peptide		Q92W34
SMb20551		CDS			1.15019	0.00720208	P.III	VI.B Hypothetical/Partial homology	Hypothetical protein		Q92W17
SMb20552		CDS			1.06082	0.00320928	P.III	VI.C Hypothetical/Global homology	Conserved hypothetical protein		Q92W16
SMb20554		CDS			1.49179	0.00482954	P.III	VI.C Hypothetical/Global similarity	Hypothetical protein		Q92W14
SMb20568		CDS	-1.03173	0.00861167			P.II	IV.D.3 carbohydrates, organic acids, alcohols	Putative organic acid ABC transporter,periplasmic solute-binding protein	K01999	Q92TN0
SMb20574		CDS	2.39275	0.000512143			P.II	I.I.4 carbon compounds	(1->4)-alpha-D-glucan 1-alpha-D-glucosylmutase	K06044	Q92TM5
SMb20575	pcaB	CDS	2.32711	0.000512143	2.38563	0.000512143	P.I	I.I.4 carbon compounds	3-carboxy-cis,cis-muconate cycloisomerase	K01857	Q92TM4
SMb20576	pcaG	CDS	1.46372	0.00805017	1.47906	0.00387636	P.I	I.I.4 carbon compounds	Protocatechuate 3,4-dioxygenase alpha chain	K00448	Q92TM3
SMb20577	pcaH	CDS			1.72234	0.000512143	P.III	I.I.4 carbon compounds	Protocatechuate 3,4-dioxygenase beta chain	K00449	Q92TM2
SMb20584		CDS			1.27536	0.000512143	P.III	I Small Molecule Metabolism	Putative oxidoreductase molybdopterin binding		Q92TL5
SMb20585	ggt	CDS			1.46077	0.000512143	P.III	I.B.6 thioredoxin, glutaredoxin, glutathione	Putative gamma-glutamyltranspeptidase	K00681	Q92TL4
SMb20592	rpoE8	CDS			2.88201	0.000512143	P.III	I.E.1 global regulatory functions	aR14 RNA polymerase sigma factor,ECF subfamily protein	K03088	Q92TK7
SMb20595	ftsK2	CDS	-2.36181	0.000512143	-2.07664	0.000512143	P.I	IV.A Cell division	Putative DNA translocase	K03466	Q92TK5
SMb20597		CDS	1.70821	0.000512143	2.56143	0.000512143	P.I	VI.C Hypothetical/Global similarity	Putative membrane protein	K15977	Q92TK3
SMb20600		CDS	3.38656	0.000512143	3.60653	0.000512143	P.I	VI.B Hypothetical/Partial homology	Hypothetical protein		Q92TK0
SMb20609		CDS			1.67895	0.000512143	P.III	VI.A Not classified regulator	Putative two-component sensor histidine kinase		Q92TJ2
SMb20611	dctA	CDS	1.97643	0.00285916			P.II	IV.D.3 carbohydrates, organic acids, alcohols	C4-dicarboxylate transport protein	K11103
SMb20614		CDS	-1.5212	0.000512143			P.II	VI.C Hypothetical/Global similarity	Hypothetical protein		Q92TJ0
SMb20615	thiC	CDS	1.09676	0.00661481	2.11919	0.000512143	P.I	I.B.8 thiamin	Putative thiamine biosynthesis protein	K03147
SMb20616	thiO	CDS	1.72162	0.00661481	2.35218	0.000512143	P.I	I.B.8 thiamin	Putative thiamine biosynthesis oxidoreductase	K03153	Q92TI8
SMb20617	thiG	CDS	2.00949	0.0091608			P.II	I.B.8 thiamin	Putative thiamine biosynthesis protein	K03149
SMb20630		CDS	-2.36008	0.000512143			P.II	IV.D.3 carbohydrates, organic acids, alcohols	Putative sugar uptake ABC transporter ATP-binding protein	K10111	Q92TH6
SMb20631		CDS	-1.38773	0.000512143			P.II	VI.C Hypothetical/Global homology	Conserved hypothetical protein	K09955	Q92TH5
SMb20649	nadE1	CDS			2.0269	0.000512143	P.III	I.B.9 pyridine nucleotide	NH(3)-dependent NAD(+) synthetase	K01916
SMb20651		CDS	-2.3402	0.000512143			P.II	I.C Fatty acid biosynthesis	Acyl carrier protein		Q92TY4
SMb20656		CDS	1.92557	0.000512143	1.63511	0.00420562	P.I	I Small Molecule Metabolism	Putative oxidoreductase		Q92TY0
SMb20658		CDS			1.70281	0.00137247	P.III	IV.D.3 carbohydrates, organic acids, alcohols	Putative sugar uptake ABC transporter permease	K02026	Q92TX8
SMb20682	iclR	CDS	-1.80219	0.000512143			P.II	I.F.17 glyoxylate bypass	Putative acetate operon repressor IclR protein	K13641	Q92TV6
SMb20686		CDS	1.78573	0.000512143	2.35062	0.000512143	P.I	II.B.8 DNA - replication, repair, restr./modif.	Putative DNA ligase	K10979	Q92TV2
SMb20698		CDS	2.31375	0.00749637			P.II	IV.D Transport of small molecules	Putative transport protein,similar to E. coli multidrug resistance protein EmrB	K03446	Q92TU0
SMb20704	glgA2	CDS	3.47127	0.000512143			P.II	II.B.5 polysaccharides - (cytoplasmic)	Putative glycogen synthase	K00703
SMb20705		CDS	-1.0599	0.00944057	-1.30932	0.00137247	P.I	VI.C Hypothetical/Global homology	Conserved hypothetical membrane protein		Q92TT4
SMb20709		CDS	2.03174	0.000512143	1.79241	0.000512143	P.I	II.B.8 DNA - replication, repair, restr./modif.	Putative 3-methyladenine DNA glycosylase	K03652
SMb20714	iatP	CDS	1.78916	0.000512143			P.II	IV.D.3 carbohydrates, organic acids, alcohols	Putative myo-inositol ABC transporter,permease component	K17214	Q92TS7
SMb20717		CDS	-1.24809	0.00176271			P.II	VI.A Not classified regulator	Putative transcriptional regulator,LacI family protein	K05499	Q92TS4
SMb20729		CDS	-2.4912	0.000512143			P.II	VI.C Hypothetical/Global homology	Conserved hypothetical protein		Q92TR4
SMb20745	glnII	CDS			-2.67321	0.000512143	P.III	I.A.18 glutamine	Glutamate-ammonia ligase	K01915	Q92TR3
SMb20746	gstI	CDS			2.9149	0.00137247	P.III	I.A.18 glutamine	Glutamine synthetase translation inhibitor		Q92TR2
SMb20747		CDS			1.74558	0.000512143	P.III	I Small Molecule Metabolism	HAD-superfamily hydrolase		Q92TR1
SMb20748	pssF	CDS	4.05017	0.000512143	1.33986	0.000512143	P.I	III.A.1 surface polysaccharides/antigens	Putative glycosyltransferase		Q92TR0
SMb20749	uxuB	CDS	-1.11278	0.00420562			P.II	I.I.4 carbon compounds	Probable mannitol dehydrogenase	K00040	Q92TQ9
SMb20751		CDS	2.15973	0.000512143	3.48755	0.000512143	P.I	I.I Degradation	Putative 3-hydroxyisobutyrate dehydrogenase	K00020	Q92TQ7
SMb20752		CDS	2.92284	0.000512143	4.18093	0.000512143	P.I	I.I Degradation	Putative enoyl-CoA hydratase	K01692	Q92TQ6
SMb20753		CDS			1.46638	0.0009592	P.III	I.I Degradation	Acyl-CoA dehydrogenase		Q92TQ5
SMb20756	pccA	CDS	-1.0343	0.00354496			P.II	I.I Degradation	Putative propionyl-CoA carboxylase alpha chain	K01965	Q92TQ2
SMb20759	phnG	CDS	3.67558	0.00720208			P.II	I.F.20 phosphorus metabolism	Probable phosphonate metabolism protein PhnG	K06166
SMb20760	phnH	CDS	4.58396	0.000512143			P.II	I.F.20 phosphorus metabolism	Probable phosphonate metabolism protein PhnH	K06165
SMb20761	phnI	CDS	4.90002	0.000512143			P.II	I.F.20 phosphorus metabolism	Uncharacterized enzyme of phosphonate metabolism	K06164
SMb20762	phnJ	CDS	5.24456	0.000512143	5.15228	0.000512143	P.I	I.F.20 phosphorous metabolism	Uncharacterized enzyme of phosphonate metabolism	K06163
SMb20763	phnK	CDS	3.42033	0.000512143	4.17345	0.000512143	P.I	I.F.20 phosphorous metabolism	Putative phosphonate uptake ABC transporter ATP-binding protein	K05781	Q7ANN2
SMb20764	phnL	CDS	3.92848	0.000512143	5.18572	0.000512143	P.I	I.F.20 phosphorous metabolism	Putative phosphonate uptake ABC transporter ATP-binding protein	K05780	Q92TQ1
SMb20765		CDS	3.86155	0.000512143			P.II	I Small Molecule Metabolism	Putative transferase		Q92TQ0
SMb20766	TRm22	CDS			2.14106	0.00176271	P.III	V.A Transposon-related functions	Putative transposase of insertion sequence ISRm22 protein	K07495	Q92TP9
SMb20772	pdxA2	CDS	-1.67876	0.000512143	-1.0476	0.00970149	P.I	I.B.10 pyridoxine	Probable pyridoxal phosphate biosynthetic protein PdxA	K00097
SMb20806		CDS	1.87581	0.000512143	2.26697	0.000512143	P.I	VI.C Hypothetical/Global similarity	Hypothetical protein		Q92W01
SMb20809	kpsF1	CDS	2.35984	0.000512143			P.II	III.A.1 surface polysaccharides/antigens	Arabinose-5-phosphate isomerase	K06041	Q92VZ8
SMb20810		CDS	1.78693	0.000512143			P.II	III.A.1 surface polysaccharides/antigens	Putative O-acetyl transferase		Q92VZ7
SMb20817		CDS	-1.33386	0.000512143			P.II	VI.A Not classified regulator	Putative transcriptional regulator,LacI family protein	K02529	Q92VZ0
SMb20825		CDS	-1.66284	0.000512143			P.II	III.A.1 surface polysaccharides/antigens	Putative acetyltransferase,cysElacA/lpxA/nodL family protein		Q92VY2
SMb20826		CDS	1.16086	0.00573901	1.52613	0.000512143	P.I	V.A Transposon-related functions	Hypothetical protein	K07483	Q92VY1
SMb20829		CDS	1.81448	0.000512143			P.II	VI MISCELLANEOUS	Putative secreted calcium-binding protein		Q92VX5
SMb20837		CDS	6.1507	0.00137247			P.II	VI.C Hypothetical/Global similarity	Hypothetical protein		Q92VW7
SMb20838		CDS	6.69679	0.000512143			P.II	VI MISCELLANEOUS	Calcium binding protein		Q92VW6
SMb20841		CDS	1.17658	0.00805017			P.II	VI.C Hypothetical/Global homology	Conserved hypothetical protein		Q92VW3
SMb20843	algI	CDS			1.16576	0.00387636	P.III	III.A.1 surface polysaccharides/antigens	Predicted membrane protein involved in D- alanine export		Q92VW1
SMb20846	xdhB2	CDS			1.60847	0.000512143	P.III	I.F.1 salvage of nucleosides and nucleotides	Probable xanthine dehydrogenase	K13482	Q92UJ2
SMb20850	lldD1	CDS	-2.33128	0.000512143	-1.18056	0.0009592	P.I	I.H.3 aerobic respiration	Putative L-lactate dehydrogenase (cytochrome) protein	K00101	Q92UI7
SMb20859		CDS	1.44916	0.00213505	1.81369	0.000512143	P.I	VI.A Not classified regulator	Putative transcriptional regulator,araC family protein	K07506	Q92UH9
SMb20866		CDS			1.47969	0.00387636	P.III	VI.C Hypothetical/Global homology	Conserved hypothetical protein		Q92UH1
SMb20875		CDS			1.52441	0.000512143	P.III	VI.C Hypothetical/Global homology	Conserved hypothetical protein		Q92UG2
SMb20876		CDS	5.97867	0.000512143	6.69402	0.000512143	P.I	VI.C Hypothetical/Global homology	Hypothetical protein		Q92UG1
SMb20879		CDS	1.09695	0.00320928	2.20103	0.000512143	P.I	VI.C Hypothetical/Global homology	Putative protein required for attachment to host cells		Q92UF8
SMb20887		CDS	-1.27407	0.0009592	-2.28204	0.000512143	P.I	VI.C Hypothetical/Global homology	Conserved hypothetical protein		Q92UF0
SMb20888		CDS	-1.0294	0.00602255	-1.60432	0.000512143	P.I	VI.C Hypothetical/Global homology	Conserved hypothetical protein		Q92UE9
SMb20889		CDS	-1.28235	0.00285916			P.II	VI.B Hypothetical/Partial similarity	Hypothetical glycine-rich protein		Q92UE8
SMb20890	araF	CDS	-1.02913	0.0091608			P.II	I.A.2 isoleucine/valine	Dihydroxy-acid dehydratase	K13875	Q92UE7
SMb20895	araA	CDS	-1.42574	0.000512143			P.II	IV.D.3 carbohydrates, organic acids, alcohols	Arabinose ABC transporter,periplasmic solute-binding protein	K10546	Q926F4
SMb20902		CDS	-2.77065	0.000512143	-1.42551	0.000512143	P.I	IV.D.3 carbohydrates, organic acids, alcohols	ABC transporter,periplasmic solute-binding protein,likely transports mannose,L-lyxose,glucose and sorbose	K10543	Q926F3
SMb20903		CDS	-1.36883	0.0009592	-1.4573	0.0009592	P.I	IV.D.3 carbohydrates, organic acids, alcohols	ABC sugar transporter,permease component,likely transports mannose,L-lyxose,glucose and sorbose	K10544	Q92UD5
SMb20904		CDS	-2.0426	0.000512143			P.II	IV.D.3 carbohydrates, organic acids, alcohols	ABC transporter,ATP-binding protein,likely transports mannose,L-lyxose,glucose and sorbose	K10545	Q92UD4
SMb20909		CDS	2.59858	0.000512143	1.76239	0.000512143	P.I	VI.D Unknown	Hypothetical protein		Q92UC7
SMb20910		CDS	2.9631	0.000512143	3.05109	0.000512143	P.I	VI.C Hypothetical/Global homology	Hypothetical protein		Q92UC6
SMb20915	aslA1	CDS			1.13492	0.00250247	P.III	I.F.3 sulfur metabolism	Putative arylsulfatase		Q92UC0
SMb20924	abfA	CDS	-1.58996	0.000512143	-1.02697	0.00995897	P.I	I.F.4 misc. glucose metabolism	Putative alpha-L-arabinofuranosidase	K01209	Q92UP9
SMb20928		CDS	3.44163	0.000512143			P.II	II.A.4 degradation of proteins, peptides, glycopeptides	Putative exported carboxyl-terminal protease		Q92UP4
SMb20931		CDS			1.85739	0.000512143	P.III	IV.D.3 carbohydrates, organic acids, alcohols	Putative galactoside ABC transporter,periplasmic solute-binding protein	K10439	Q926F9
SMb20932	exsH	CDS	3.10673	0.000512143	3.03843	0.000512143	P.I	II.A.3 degradation of polysaccharides	Glucan endo-1,3-beta-D-glucosidase	K20276
SMb20936		CDS			1.42068	0.000512143	P.III	VI.B Hypothetical/Partial homology	Hypothetical protein		Q92UP0
SMb20941	exsA	CDS	-2.20584	0.000512143			P.II	III.A.1 surface polysaccharides/antigens	MsbA-like saccharide exporting ABC transporter protein,consisting of ATP-binding and permease domains	K06147	Q7ANN9
SMb20942	exoB	CDS			1.28904	0.0009592	P.III	III.A.1 surface polysaccharides/antigens	UDP glucose 4-epimerase	K01784
SMb20943	exoZ	CDS	2.37838	0.00749637			P.II	III.A.1 surface polysaccharides/antigens	Acetyltransferase	K16568
SMb20944	exoQ	CDS	2.8395	0.000512143	2.52764	0.000512143	P.I	III.A.1 surface polysaccharides/antigens	Putative polysaccharide polymerase,similar to Wzy protein	K16567
SMb20945	exoF1	CDS	4.3837	0.000512143	3.04587	0.000512143	P.I	III.A.1 surface polysaccharides/antigens	Periplasmic protein involved in polysaccharide export	K16552
SMb20946	exoY	CDS	5.44588	0.000512143	3.26174	0.000512143	P.I	III.A.1 surface polysaccharides/antigens	Exopolysaccharide production protein,probable sugar transferase involved in lipopolysaccharide synthesis,regulated by ExoR	K16566
SMb20947	exoX	CDS			0.995582	0.00573901	P.III	III.A.1 surface polysaccharides/antigens	Post-transcriptional regulator,repressor protein ExoX	K16565
SMb20948	exoU	CDS	3.72152	0.000512143	2.3766	0.000512143	P.I	III.A.1 surface polysaccharides/antigens	Glucosyltransferase	K16564
SMb20949	exoV	CDS	3.90155	0.000512143	2.16454	0.000512143	P.I	III.A.1 surface polysaccharides/antigens	Putative pyruvyltransferase	K16563
SMb20951	exoI	CDS	1.73014	0.000512143			P.II	III.A.1 surface polysaccharides/antigens	Probable exopolysaccharide biosynthesis protein	K16561
SMb20954	exoH	CDS	6.21849	0.000512143	3.40305	0.000512143	P.I	III.A.1 surface polysaccharides/antigens	Succinyltransferase	K16560
SMb20955	exoK	CDS	5.72151	0.000512143	3.59872	0.000512143	P.I	II.A.3 degradation of polysaccharides	Licheninase	K16559
SMb20957	exoA	CDS	4.86101	0.0009592	3.55511	0.00137247	P.I	III.A.1 surface polysaccharides/antigens	Glycosyltransferase,succinoglycan biosynthesis protein	K16557
SMb20958	exoM	CDS	5.0724	0.00176271	3.84873	0.00213505	P.I	III.A.1 surface polysaccharides/antigens	Probable succinoglycan biosynthesis protein	K16556
SMb20960	exoN	CDS	5.25758	0.000512143	4.06613	0.000512143	P.I	III.A.1 surface polysaccharides/antigens	UDPglucose pyrophosphorylase	K00963
SMb20961	exoP	CDS	4.44381	0.000512143	3.3174	0.000512143	P.I	III.A.1 surface polysaccharides/antigens	Protein-tyrosine kinase	K16554
SMb20975		CDS			1.89967	0.000512143	P.III	IV.D.2 amino acids, amines, peptides	Putative amino acid uptake ABC transporter permease	K02029	Q92UM5
SMb20984	nirB	CDS			-4.56529	0.000512143	P.III	I.H Energy metabolism, carbon	Nitrite reductase [NAD(P)H]	K00362	Q92UL8
SMb20986	narB	CDS	-2.64133	0.000512143			P.II	I.H Energy metabolism, carbon	Putative nitrate reductase,large subunit	K00372	Q92UL6
SMb20987		CDS	2.65699	0.00777209			P.II	I.B.4 heme, porphyrin	Putative uroporphiryn-III C-methyltransferase	K02302	Q92UL5
SMb20990	nfeD	CDS	2.22648	0.000512143			P.II	IV.H Nodulation	Probable membrane protein necessary for nodulation competitiveness	K07403	Q92UL2
SMb20991		CDS	2.25929	0.000512143	2.16705	0.000512143	P.I	VI.C Hypothetical/Global homology	Conserved hypothetical protein,similar to Y2992,slightly similar to monooxygenase		Q92UL1
SMb20992		CDS	1.93997	0.000512143	1.39742	0.000512143	P.I	VI.C Hypothetical/Global homology	Conserved hypothetical protein,similar to Y2991		Q92UL0
SMb20995	engA	CDS	-2.24346	0.000512143			P.II	I Small Molecule Metabolism	Putative GTP-binding protein	K03977
SMb20996		CDS	-1.6931	0.000512143			P.II	VI.C Hypothetical/Global homology	Conserved hypothetical protein		Q92UK5
SMb21009	glpK	CDS	-1.36936	0.000512143			P.II	I.F.18 pool of unassigned individual reversible reactions	Probable glycerol kinase,similar to sugar kinases protein	K00864
SMb21010	bdhA	CDS			1.44506	0.000512143	P.III	I.I.4 carbon compounds	D-beta-hydroxybutyrate dehydrogenase	K00019
SMb21021		CDS			-1.82582	0.000512143	P.III	VI.A Not classified regulator	Putative transcriptional regulator	K11531	Q92VV4
SMb21025		CDS	2.53318	0.000512143	1.52807	0.000512143	P.I	VI.D Unknown	Hypothetical protein		Q92VV0
SMb21040		CDS	1.95992	0.00513758			P.II	IV.D.2 amino acids, amines, peptides	Putative oligopeptide/murein peptide ABC transporter ATP-binding protein	K02031	Q92VT7
SMb21044	ligD3	CDS			1.19482	0.00137247	P.III	II.B.8 DNA - replication, repair, restr./modif.	Putative ATP-dependent DNA ligase	K01971	Q92VT3
SMb21048		CDS	1.34761	0.00285916	1.58407	0.000512143	P.I	VI.C Hypothetical/Global similarity	Hypothetical membrane protein		Q92VS2
SMb21052		CDS	1.30047	0.00777209			P.II	I.F.10 sugar-nucleotide biosynthesis, conversions	DTDP-glucose 4,6-dehydratase	K01710, K01784	Q92VR8
SMb21053		CDS	1.57608	0.00176271			P.II	III.A.1 surface polysaccharides/antigens	Putative membrane-anchored glycosyltransferase		Q92VR7
SMb21055		CDS	2.09032	0.00805017			P.II	I Small Molecule Metabolism	Putative protein,slightly similar to metyltransfrases		Q92VR5
SMb21060		CDS	1.79089	0.00452512			P.II	I.F.10 sugar-nucleotide biosynthesis, conversions	UDP-glucose 4-epimerase		Q92VR0
SMb21061		CDS	1.34627	0.000512143	1.22784	0.00213505	P.I	I.F.10 sugar-nucleotide biosynthesis, conversions	Putative NDP-hexose 3-C-methyltransferase		Q92VQ9
SMb21062		CDS	1.19819	0.00832418	1.34756	0.00354496	P.I	I.F.10 sugar-nucleotide biosynthesis, conversions	Putative sugar nucleotide processing enzyme,similar to NDP-hexose methyltransferase		Q92VQ8
SMb21063		CDS	1.51581	0.000512143	1.64417	0.000512143	P.I	VI.C Hypothetical/Global similarity	Hypothetical nucleotide-binding protein		Q92VQ7
SMb21065		CDS	1.87572	0.00176271			P.II	VI.B Hypothetical/Partial similarity	Hypothetical protein		Q92VQ5
SMb21066		CDS	1.57486	0.00482954	1.66977	0.00632638	P.I	III.A.1 surface polysaccharides/antigens	Putative glycosyltransferase		Q92VQ4
SMb21067		CDS			1.43493	0.000512143	P.III	I.F.10 sugar-nucleotide biosynthesis, conversions	Putative NDP-hexose methyltransferase		Q92VQ3
SMb21068		CDS			1.21356	0.00482954	P.III	III.A.1 surface polysaccharides/antigens	Putative lipopolysaccharide 1,3-galactosyltransferase		Q92VQ2
SMb21069		CDS	1.02284	0.00602255	1.22672	0.00137247	P.I	VI.B Hypothetical/Partial similarity	Hypothetical protein		Q92VQ1
SMb21079		CDS			1.78724	0.000512143	P.III	VI.A Not classified regulator	Putative cAMP binding transcription regulator,CRP family		Q92VP1
SMb21081	manB	CDS	1.96608	0.00661481			P.II	I.F.10 sugar-nucleotide biosynthesis, conversions	Phosphomannomutase	K15778	Q92VN9
SMb21085		CDS	-1.14022	0.00387636			P.II	V.A Transposon-related functions	Putative transposase	K07484	Q92VN5
SMb21091	lysM	CDS	-1.13944	0.000512143			P.II	II.A.3 degradation of polysaccharides	Lysozyme	K07273	Q92VM9
SMb21092		CDS	-1.49785	0.000512143			P.II	I Small Molecule Metabolism	Putative acetyltransferase		Q92VM8
SMb21094	argH2	CDS	-2.07616	0.00544021			P.II	I.A.17 arginine	Probable argininosuccinate lyase	K01755
SMb21095		CDS	-3.55223	0.00452512			P.II	IV.D.2 amino acids, amines, peptides	ABC transporter,permease	K02029	Q92VM5
SMb21097		CDS	-3.78741	0.000512143	-2.56637	0.000512143	P.I	IV.D.2 amino acids, amines, peptides	ABC transporter,periplasmic solute-binding protein	K02030	Q926H5
SMb21098		CDS	-1.51819	0.000512143			P.II	VI.C Hypothetical/Global homology	Hypothetical membrane-anchored protein		Q92VM3
SMb21101		CDS	-1.78064	0.000512143			P.II	VI.C Hypothetical/Global homology	Conserved hypothetical membrane-anchored protein		Q92VM0
SMb21114		CDS			-2.98712	0.00995897	P.III	IV.D.1 anions	Putative nitrate transport protein	K22067	Q92VK8
SMb21115		CDS			-1.75026	0.000512143	P.III	VI.A Not classified regulator	Putative response regulator	K07183	Q92VK7
SMb21130	cysA2	CDS	1.09669	0.00482954			P.II	IV.D.1 anions	Sulfate-transporting ATPase	K02045
SMb21133		CDS	1.85813	0.000512143			P.II	IV.D.1 anions	Putative sulfate uptake ABC transporter,periplasmic solute-binding protein	K23163	Q926B6
SMb21134		CDS			1.38012	0.000512143	P.III	I.F.14 amino acids	Amino acid aldolase or racemase		Q92VI9
SMb21135		CDS	-2.25825	0.000512143			P.II	IV.D.7 Other transport	ABC transporter,periplasmic solute-binding protein,may be involved in transport of sugar amines (galactosamine and glucosamine)	K02030	Q926H3
SMb21138		CDS			-2.00069	0.00544021	P.III	IV.D.7 other transport	ABC transporter,ATP-binding protein,may be involved in transport of sugar amines	K02028	Q92VI6
SMb21140		CDS	-1.00952	0.00889017			P.II	VI.A Not classified regulator	Transcriptional regulator,IclR family		Q92VI4
SMb21143	merA2	CDS	1.37052	0.000512143	1.85574	0.000512143	P.I	I Small Molecule Metabolism	Putative FAD-dependent pyridine nucleotide-disulphide oxidoreductase,similar to mercuric reductases protein		Q92V99
SMb21144		CDS	1.24749	0.00213505	2.1542	0.000512143	P.I	IV.D Transport of small molecules	Putative choline uptake ABC transporter periplasmic solute-binding protein precursor	K05845	Q926G9
SMb21145		CDS	2.22962	0.000512143	1.6121	0.00137247	P.I	IV.D Transport of small molecules	Putative choline uptake ABC transporter permease	K05846	Q92V98
SMb21148		CDS			-1.51335	0.000512143	P.III	I Small Molecule Metabolism	Probable oxidoreductase		Q92V95
SMb21150		CDS	1.95593	0.00176271			P.II	IV.D.7 other transport	Putative sugar amine ABC transporter,permease component	K02026	Q92V93
SMb21151		CDS	-1.26799	0.000512143			P.II	IV.D.7 other transport	Putative sugar amine ABC transporter,periplasmic solute-binding protein	K02027	Q92V92
SMb21152		CDS			-1.34506	0.000512143	P.III	IV.D.7 other transport	Putative sugar amine ABC transporter,ATP-binding protein	K10111	Q92V91
SMb21154		CDS			1.46298	0.00137247	P.III	VI.C Hypothetical/Global similarity	Hypothetical protein,bleomycin resistance protein family		Q92V89
SMb21168		CDS			1.36076	0.00176271	P.III	IV.D Transport of small molecules	Putative integral membrane transporter		Q92V77
SMb21170	phnN,nitR	CDS			3.81139	0.00387636	P.III	I.F.1 salvage of nucleosides and nucleotides	Guanylate kinase,regulates hmgA	K05774	Q92V75
SMb21171	phnM	CDS	3.37848	0.000512143	4.32386	0.000512143	P.I	I.F.20 phosphorus metabolism	Putative hydrolase	K06162	Q92V74
SMb21174	phoT	CDS	6.95461	0.000512143	7.25459	0.000512143	P.I	IV.D.1 anions	Phosphate uptake ABC transporter permease	K02042	Q7ANR3
SMb21175	phoE	CDS	7.62266	0.000512143	7.91862	0.000512143	P.I	IV.D.1 anions	Phosphate uptake ABC transporter permease	K02042	Q7ANR2
SMb21176	phoD	CDS	9.71044	0.000512143	8.83681	0.000512143	P.I	IV.D.1 anions	Phosphate uptake ABC transporter periplasmic solute-binding protein precursor	K02044	Q7ANR1
SMb21177	phoC	CDS	9.43383	0.00452512	9.7423	0.000512143	P.I	IV.D.1 anions	Phosphate uptake ABC transporter ATP-binding protein	K02041
SMb21178		CDS			1.66725	0.000512143	P.III	I Small Molecule Metabolism	Putative membrane protein,similar to methyltransferases	K14083	Q92V70
SMb21183	htpG	CDS	-2.05719	0.00213505			P.II	IV.B Chaperoning	Probable chaperonine,heat shock hsp9 proteins family	K04079
SMb21184	ackA2	CDS	1.51935	0.00632638			P.II	I.G.1 electron transport	Putative acetate kinase (acetokinase)	K00925
SMb21188		CDS	4.18845	0.000512143			P.II	III.A.1 surface polysaccharides/antigens	Putative acyltransferase,possibly surface-saccharide specific acetyltransferase		Q92V62
SMb21189		CDS	3.66049	0.000512143			P.II	III.A.1 surface polysaccharides/antigens	Putative glycosyltransferase		Q92V61
SMb21190		CDS	3.02815	0.000512143			P.II	III.A.1 surface polysaccharides/antigens	Putative glycosyltransferase		Q92V60
SMb21191	msbA2	CDS	1.91587	0.000512143	1.04468	0.00889017	P.I	III.A.1 surface polysaccharides/antigens	Polysaccharide exporting ABC transporter,ATP-binding and permease components	K11085	Q92V59
SMb21196	oppA	CDS	-1.29416	0.00137247			P.II	IV.D.2 amino acids, amines, peptides	ABC transporter of tetrapeptides and some tripeptides,periplasmic solute-binding protein	K15580	Q7ANR0
SMb21197	oppB	CDS			-2.11758	0.00137247	P.III	IV.D.2 amino acids, amines, peptides	ABC transporter of tetrapeptides and some tripeptides,permease component	K15581	Q7ANQ9
SMb21198	oppC	CDS	-2.04388	0.000512143	-1.89142	0.000512143	P.I	IV.D.2 amino acids, amines, peptides	ABC transporter of tetrapeptides and some tripeptides,permease component	K15582	Q92V54
SMb21204		CDS			-1.41202	0.00176271	P.III	IV.D Transport of small molecules	Probable ABC transporter,permease component	K25180	Q92V47
SMb21206		CDS			-2.85528	0.000512143	P.III	IV.D Transport of small molecules	Putative ABC transporter ATP-binding protein,consisting of 2 fused ATP-binding domains	K25182	Q92V45
SMb21208		CDS	-2.51066	0.00137247	-2.2071	0.00777209	P.I	VI.A Not classified regulator	Putative transcriptional regulator,TetR family protein	K23777	Q92V43
SMb21211		CDS	3.55126	0.000512143	2.83719	0.000512143	P.I	VI.C Hypothetical/Global similarity	Putative membrane protein	K03760	Q92V40
SMb21212		CDS	1.72244	0.000512143	1.51443	0.00137247	P.I	VI.C Hypothetical/Global homology	Conserved hypothetical protein		Q92V39
SMb21213	pphA	CDS	-1.34156	0.00749637			P.II	VI MISCELLANEOUS	Putative serine/threonine protein phosphatase	K07313	Q92V37
SMb21215	orf23	CDS	1.06368	0.00602255	1.34509	0.000512143	P.I	IV.D Transport of small molecules	Putative dipeptide uptake ABC transporter periplasmic solute-binding protein precursor	K02035	Q926G8
SMb21221		CDS	-2.18376	0.000512143	-2.16316	0.000512143	P.I	IV.D.7 other transport	putative sugar amine ABC transporter,periplasmic solute-binding protein	K02027	Q926H2
SMb21236		CDS			1.17837	0.000512143	P.III	VI.C Hypothetical/Global homology	Hypothetical protein		Q92VG5
SMb21244		CDS	1.19922	0.00749637			P.II	VI.C Hypothetical/Global similarity	Hypothetical protein		Q92VF7
SMb21245	exoF3	CDS			1.19372	0.000512143	P.III	III.A.1 surface polysaccharides/antigens	Putative polysaccharide export outer membrane protein	K16552	Q926B5
SMb21250		CDS	2.10731	0.000512143	1.83319	0.00137247	P.I	III.A.1 surface polysaccharides/antigens	Putative glycosyltransferase		Q92VF2
SMb21251		CDS			1.72763	0.000512143	P.III	VI.C Hypothetical/Global homology	Conserved hypothetical membrane protein,similar to Y158	K22044	Q92VF1
SMb21269		CDS			1.09586	0.00285916	P.III	IV.D Transport of small molecules	Putative ABC transporter	K02021	Q92VD4
SMb21270		CDS	1.40637	0.000512143	2.88987	0.000512143	P.I	VI.A Not classified regulator	Putative cyclic nucleotide-binding protein		Q92VD3
SMb21271		CDS	-1.02353	0.00387636			P.II	VI.C Hypothetical/Global homology	Conserved hypothetical protein		Q92VD2
SMb21272		CDS			-2.6825	0.00320928	P.III	VI.A Not classified regulator	Putative lacI family transcritional regulator	K02529	Q92VD1
SMb21273		CDS	-1.49746	0.00137247	-2.21206	0.000512143	P.I	IV.D Transport of small molecules	ABC transporter,periplasmic solute-binding protein	K02055	Q926H0
SMb21274		CDS			-2.70237	0.000512143	P.III	IV.D Transport of small molecules	ABC transporter,permease component	K02054	Q92VD0
SMb21277		CDS			-2.38947	0.00573901	P.III	I.F.1 salvage of nucleosides and nucleotides	Hydrolase	K01239	Q92VC7
SMb21278	ade2	CDS			-1.32904	0.00777209	P.III	I.D.2 purine ribonucleotide biosynthesis	Probable adenine deaminase	K01486
SMb21284		CDS	2.2891	0.00250247			P.II	I.I.4 carbon compounds	Putative polysaccharide deacetylase	K00365	Q92VC0
SMb21287	xdhB1	CDS			1.66564	0.000512143	P.III	I.F.1 salvage of nucleosides and nucleotides	Putative xanthine dehydrogenase	K13482	Q92VB7
SMb21289		CDS			1.76542	0.00632638	P.III	VI.A Not classified regulator	Putative transcription regulator,HxlR family		Q92VB5
SMb21291		CDS			1.26244	0.000512143	P.III	VI.A Not classified regulator	Putative transcriptional regulator,lysR family protein		Q92VB3
SMb21296		CDS	1.74033	0.000512143			P.II	VI.C Hypothetical/Global similarity	Hypothetical protein		Q92VA8
SMb21297	pbpC	CDS	1.60728	0.000512143	1.83768	0.000512143	P.I	VI MISCELLANEOUS	Probable bifunctional penicillin-binding protein	K05367	Q92VA7
SMb21298		CDS	1.08072	0.00632638	2.003	0.000512143	P.I	VI.C Hypothetical/Global homology	Conserved hypothetical protein,possibly exported	K06894	Q92VA6
SMb21303		CDS	-1.51384	0.000512143			P.II	VI.C Hypothetical/Global homology	Conserved hypothetical protein		Q92VA1
SMb21307	wgeH	CDS			2.20261	0.000512143	P.III	III.A.1 surface polysaccharides/antigens	Hypothetical protein WgeH (formerly ExpE8)		Q7ANQ8
SMb21308	wgeG	CDS	2.30081	0.000512143	3.52016	0.000512143	P.I	III.A.1 surface polysaccharides/antigens	Putative glycosyltransferase,forming alpha glycosyl linkages protein WgeG (formerly ExpE7)		Q92V35
SMb21309	wgeF	CDS	2.60145	0.000512143	3.73052	0.000512143	P.I	III.A.1 surface polysaccharides/antigens	Putative membrane protein WgeF (formerly ExpE6)		Q92V34
SMb21310	wgeE	CDS	2.88644	0.000512143	4.98048	0.000512143	P.I	III.A.1 surface polysaccharides/antigens	Putative membrane protein WgeE (formerly ExpE5)		Q7ANQ7
SMb21311	wgeD	CDS			4.135	0.000512143	P.III	III.A.1 surface polysaccharides/antigens	Putative glycosyltransferase,forming alpha-glycosyl linkages protein WgeD (formerly ExpE4)		Q7ANQ6
SMb21312	wgeC	CDS	3.20145	0.000512143	4.48267	0.000512143	P.I	III.A.1 surface polysaccharides/antigens	Putative methyltransferase protein WgeC (formerly ExpE3)		Q7ANQ5
SMb21313	wgeB	CDS	3.66028	0.000512143	4.27967	0.000512143	P.I	III.A.1 surface polysaccharides/antigens	Putative bifunctional glycosyltransferase,forming alpha-glycosyl and beta-glycosyl linkages protein WgeB (formerly ExpE2)		Q7ANQ4
SMb21314	wgeA	CDS	6.27857	0.000512143	7.14478	0.000512143	P.I	III.A.1 surface polysaccharides/antigens	RTX toxins and related Ca2+-binding proteins		Q7ANQ3
SMb21315	wgdB	CDS			4.41022	0.000512143	P.III	III.A.1 surface polysaccharides/antigens	Membrane-fusion protein	K12537	Q7ANQ2
SMb21316	wgdA	CDS	4.03482	0.000512143	4.62781	0.000512143	P.I	III.A.1 surface polysaccharides/antigens	ABC transporter,type I secretion system ATPase,required for secretion of WgeA (formerly ExpE1)	K12536	Q92V33
SMb21317	wggR	CDS	4.42774	0.000512143	4.59075	0.000512143	P.I	III.A.1 surface polysaccharides/antigens	Transcriptional activator of exopolysaccharide II synthesis,binding to expA1,expG/expD1 and expE1 promotors,(formerly ExpG)
SMb21318	wgcA	CDS	2.94649	0.000512143	3.76967	0.000512143	P.I	III.A.1 surface polysaccharides/antigens	Putative glycosyltransferase,forming alpha-glycosyl linkages protein WgcA (formerly ExpC)		Q7ANQ1
SMb21319	wgaA	CDS	3.27051	0.000512143	3.63259	0.000512143	P.I	III.A.1 surface polysaccharides/antigens	Putative membrane protein WgaA (formerly ExpA1)		Q7ANQ0
SMb21320	wgaB	CDS	3.08088	0.000512143	3.1089	0.000512143	P.I	III.A.1 surface polysaccharides/antigens	Putative bifunctional glycosyltransferase,forming beta-glycosyl and alpha-glycosyl linkages protein WgaB (formerly ExpA23)		Q92V32
SMb21321	wgaD	CDS	3.31834	0.000512143	4.05753	0.000512143	P.I	III.A.1 surface polysaccharides/antigens	Putative membrane-anchored protein WgaD (formerly ExpA4)		Q92V31
SMb21322	wgaE	CDS	2.12864	0.00861167	3.59105	0.000512143	P.I	III.A.1 surface polysaccharides/antigens	Putative membrane-anchored protein WgaE (formerly ExpA5)		Q7ANP9
SMb21326	wgaI	CDS			3.16861	0.0009592	P.III	III.A.1 surface polysaccharides/antigens	Putative dTDP-D-glucose 4,6-dehydratase protein WgaI (formerly ExpA9)	K01710	Q7ANP6
SMb21328		CDS	3.27011	0.00354496			P.II	VI.C Hypothetical/Global homology	Conserved hypothetical protein		Q7ANP5
SMb21329		CDS			4.3261	0.000512143	P.III	VI.D Unknown	Hypothetical exported peptide protein		Q92V28
SMb21330		CDS	3.58248	0.00452512			P.II	VI.C Hypothetical/Global homology	Conserved hypothetical protein
SMb21331		CDS	1.9265	0.000512143	2.3437	0.000512143	P.I	VI.D Unknown	Hypothetical protein		Q92V26
SMb21332		CDS			1.7012	0.00285916	P.III	VI.C Hypothetical/Global similarity	Hypothetical protein		Q92V25
SMb21334		CDS	3.9448	0.000512143			P.II	VI.B Hypothetical/Partial homology	Hypothetical exported glutamine-rich protein		Q92V23
SMb21335		CDS	1.23533	0.00420562			P.II	VI.C Hypothetical/Global similarity	Conserved putative membrane protein,possibly a permease		Q92V22
SMb21336		CDS	2.32217	0.0009592			P.II	VI.A Not classified regulator	Putative transcriptional regulator,AraC family protein	K07506	Q92V21
SMb21345		CDS	-2.02339	0.000512143	-1.68447	0.00213505	P.I	IV.D.3 carbohydrates, organic acids, alcohols	Putative galactose ABC transporter,periplasmic solute-binding protein	K23508	Q926G7
SMb21346		CDS	-1.17221	0.00513758	-1.51444	0.00137247	P.I	VI.A Not classified regulator	Putative transcriptional regulator,LacI family protein	K02529	Q92V12
SMb21355		CDS	1.95803	0.00777209	3.02317	0.00137247	P.I	I Small Molecule Metabolism	Putative oxidoreductase		Q92V03
SMb21357		CDS	2.93147	0.00137247			P.II	VI.C Hypothetical/Global similarity	Hypothetical membrane protein		Q92V01
SMb21361		CDS	1.42744	0.00602255			P.II	VI.C Hypothetical/Global similarity	Hypothetical membrane-anchored protein		Q92UZ7
SMb21363		CDS	1.30321	0.00970149			P.II	VI.C Hypothetical/Global homology	Conserved hypothetical membrane protein	K07058	Q92UZ4
SMb21374	tagD	CDS	-2.16806	0.00250247			P.II	I.H Energy metabolism, carbon	Putative carbohydrate kinase	K21621	Q92UY2
SMb21377		CDS	-3.16301	0.000512143	-1.38633	0.000512143	P.I	IV.D.3 carbohydrates, organic acids, alcohols	Putative polyols and C6 monosaccharide ABC transporter,periplasmic solute-binding protein	K10439	Q926G6
SMb21380		CDS	1.66986	0.000512143	1.14318	0.00482954	P.I	I Small Molecule Metabolism	Catechol 1,2-dioxygenase		Q92UX7
SMb21399		CDS	3.18068	0.00176271	3.42799	0.000512143	P.I	VI.D Unknown	Hypothetical protein		Q92UB1
SMb21410		CDS	1.59374	0.00573901	2.28354	0.000512143	P.I	I Small Molecule Metabolism	Putative methyltransferase,S-Adenosyl-L-methionine (SAM)-MTase		Q92U99
SMb21414		CDS	1.42177	0.00970149			P.II	I.I.3 amino acids	Aromatic-L-amino-acid decarboxylase		Q92U95
SMb21415		CDS			1.62904	0.00420562	P.III	I Small Molecule Metabolism	Putative oxidoreductase,oxygen dependent,FAD-dependent protein		Q92U94
SMb21416	ddhA	CDS	-2.30274	0.000512143			P.II	I.F.10 sugar-nucleotide biosynthesis, conversions	Putative glucose-1-phosphate cytidylyltransferase	K00978	Q92U93
SMb21417	ddhB	CDS	-2.50505	0.000512143			P.II	I.F.10 sugar-nucleotide biosynthesis, conversions	Putative CDP-glucose 4,6-dehydratase	K01709	Q92U92
SMb21418		CDS	-2.48119	0.000512143	-1.54762	0.000512143	P.I	I.F.10 sugar-nucleotide biosynthesis, conversions	Putative NDP-hexose 3-C-methyltransferase		Q92U91
SMb21425		CDS	-1.60059	0.00250247			P.II	I Small Molecule Metabolism	Putative methyltransferase		Q92U84
SMb21429		CDS			-2.08722	0.00176271	P.III	IV.D.4 Cations	Iron-chelate-transporting ATPase	K02013	Q92U80
SMb21430		CDS			-2.63284	0.00250247	P.III	IV.D.4 Cations	Putative iron ABC transporter permease	K02015	Q92U79
SMb21432		CDS	-1.79158	0.000512143	-2.48503	0.000512143	P.I	IV.D.4 Cations	Putative iron uptake ABC transporter periplasmic solute-binding protein precursor	K02016	Q926F1
SMb21433		CDS	-1.69192	0.000512143	-1.51843	0.000512143	P.I	I Small Molecule Metabolism	Putative methyl-transferase,S-Adenosyl-L-methionine (SAM)-MTase		Q92U77
SMb21440		CDS	7.10724	0.000512143			P.II	VI.C Hypothetical/Global homology	Conserved hypothetical protein,signal peptide		Q92U70
SMb21441		CDS	2.74736	0.000512143	1.87533	0.00602255	P.I	VI.C Hypothetical/Global homology	Conserved hypothetical protein		Q92U69
SMb21446	glgX2	CDS	1.65705	0.000512143	1.74889	0.000512143	P.I	II.B.5 polysaccharides - (cytoplasmic)	Isoamylase	K01214	Q92U64
SMb21450		CDS	1.81322	0.00387636			P.II	VI.C Hypothetical/Global homology	Conserved hypothetical protein		Q92U60
SMb21452		CDS	2.12156	0.00832418			P.II	VI.B Hypothetical/Partial homology	Hypothetical protein		Q92U59
SMb21454		CDS	2.57932	0.000512143			P.II	VI.C Hypothetical/Global homology	Hypothetical protein		Q92U58
SMb21456		CDS	3.42091	0.000512143	3.67583	0.000512143	P.I	VI.C Hypothetical/Global homology	Conserved hypothetical protein		Q92U56
SMb21467		CDS	1.5222	0.000512143			P.II	VI.B Hypothetical/Partial similarity	Hypothetical protein		Q92U49
SMb21472		CDS	3.01318	0.00387636			P.II	VI.B Hypothetical/Partial similarity	Hypothetical protein		Q92U44
SMb21479		CDS	-2.51457	0.000512143			P.II	VI.C Hypothetical/Global similarity	Hypothetical protein		Q92U37
SMb21486		CDS	1.17636	0.00137247			P.II	IV.D Transport of small molecules	Putative permease		Q92U28
SMb21487	cyoA	CDS	-4.99808	0.000512143	-1.94899	0.000512143	P.I	I.H.3 aerobic respiration	Putative cytochrome o ubiquinol oxidase chain II	K02297	Q92U27
SMb21488	cyoB	CDS	-3.58837	0.000512143	-1.74592	0.0009592	P.I	I.H.3 aerobic respiration	Putative cytochrome o ubiquinol oxidase chain I	K02298	Q92U26
SMb21489	cyoC	CDS	-4.55386	0.000512143			P.II	I.H.3 aerobic respiration	Putative cytochrome o ubiquinol oxidase chain III	K02299	Q7ANN3
SMb21494	ocd	CDS	-1.45816	0.00137247			P.II	I.I.3 amino acids	Putative ornithine cyclodeaminase	K01750	Q92U20
SMb21497	acrE	CDS			1.6882	0.000512143	P.III	III.B.1 membrane, inner	Putative acriflavin resistance protein		Q92U16
SMb21502		CDS	-1.5554	0.000512143			P.II	III.A.1 surface polysaccharides/antigens	Putative glycosyltransferase		Q92U11
SMb21503		CDS	-1.77907	0.000512143			P.II	III.A.1 surface polysaccharides/antigens	Putative glycosyltransferase		Q92U10
SMb21504		CDS	-1.769	0.000512143			P.II	III.A.1 surface polysaccharides/antigens	Putative protein,slightly similar to carbohydrate deacetylase		Q92U09
SMb21505	wzy	CDS	-1.49095	0.00632638			P.II	III.A.1 surface polysaccharides/antigens	Putative membrane protein,similar to Wzy-like polysaccharide polymerase ExoQ		Q92U08
SMb21506		CDS	-1.77404	0.000512143			P.II	III.A.1 surface polysaccharides/antigens	Protein involved in the production of the high molecular weight form of EPSI		Q92U07
SMb21508	dapA3	CDS	-1.61649	0.000512143			P.II	I.A.13 lysine	Putative dihydrodipicolinate synthetase	K01714	Q92U05
SMb21518		CDS	3.51006	0.0009592			P.II	VI.C Hypothetical/Global homology	Conserved hypothetical protein,signal peptide		Q92TZ5
SMb21524	minC	CDS	-1.16105	0.00250247			P.II	IV.A Cell division	Putative cell division inhibitor	K03610
SMb21533		CDS			-1.59318	0.000512143	P.III	VI.A Not classified regulator	Putative transcriptional regulator		Q92UW3
SMb21540		CDS			1.41138	0.00354496	P.III	IV.D.5 incorporation metal ions	Putative iron uptake ABC transporter periplasmic solute-binding protein precursor	K02012	Q926G4
SMb21542		CDS	1.55571	0.00354496			P.II	IV.D.5 incorporation metal ions	Putative iron uptake ABC transporter permease	K02011	Q92UV4
SMb21543		CDS	2.35523	0.000512143	1.93918	0.000512143	P.I	VI.C Hypothetical/Global homology	Conserved hypothetical protein,haemolysin-type calcium-binding regions		Q92UV3
SMb21546		CDS			1.62406	0.00137247	P.III	VI.A Not classified regulator	Putative two-component sensor histidine kinase		Q92UV0
SMb21549	thtR	CDS			-1.39432	0.000512143	P.III	IV.G.4 detoxification	Putative exported sulfurtransferase,Rhodanese protein	K01011	Q92UU7
SMb21552	aacC4	CDS			-1.41552	0.00285916	P.III	IV.G.2 drug/analog sensitivity and resistance	Putative aminoglycoside 6'-N-acetyltransferase,similar to amikacin resistance protein	K00663	Q92UU4
SMb21555	kefB2	CDS			1.37403	0.00944057	P.III	IV.D.4 cations	Probable glutathione-regulated potassium-efflux system	K11747	Q92UU2
SMb21559		CDS			1.40049	0.00387636	P.III	VI.A Not classified regulator	Putative transcriptional regulator,araC family protein		Q92UT8
SMb21561		CDS			1.72711	0.000512143	P.III	VI.A Not classified regulator	Putative two-component response regulator		Q92UT6
SMb21562		CDS	3.22666	0.000512143	4.79269	0.000512143	P.I	VI.B Hypothetical/Partial homology	Hypothetical membrane-anchored protein	K06006	Q92UT5
SMb21570	stcD	CDS			-1.01836	0.00805017	P.III	I.I Degradation	N-methylproline demethylase	K22551
SMb21572		CDS			-1.54575	0.000512143	P.III	IV.D.2 amino acids, amines, peptides	Putative amino acid uptake ABC transporter periplasmic solute-binding protein precursor	K02002	Q926G3
SMb21573		CDS			-1.61115	0.000512143	P.III	VI.C Hypothetical/Global homology	Conserved hypothetical protein,signal peptide		Q92US7
SMb21575		CDS	1.21709	0.00970149			P.II	IV.D Transport of small molecules	Putative major facilitator superfamily transporter		Q92US5
SMb21581		CDS	2.87997	0.000512143			P.II	III.A.1 surface polysaccharides/antigens	Putative glycosyltransferase,similar to smb2117 protein	K12995	Q92US1
SMb21585		CDS	1.53515	0.00285916			P.II	VI.C Hypothetical/Global homology	Conserved hypothetical protein		Q92UR7
SMb21598		CDS	-1.06276	0.00420562			P.II	VI.A Not classified regulator	Putative transcriptional regulator		Q92UQ6
SMb21600	ampC	CDS	-1.51784	0.000512143			P.II	IV.G.2 drug/analog sensitivity and resistance	Putative exported beta-lactamase	K01467	Q92UQ4
SMb21605		CDS	-2.02686	0.000512143			P.II	IV.D.3 carbohydrates, organic acids, alcohols	Putative sugar uptake ABC transporter ATP-binding protein	K10111	Q92UQ0
SMb21630		CDS	-3.12792	0.000512143	-1.30804	0.000512143	P.I	VI.C Hypothetical/Global homology	Conserved hypothetical protein		Q92TH0
SMb21631	nspC	CDS	-4.53426	0.000512143	-1.86569	0.000512143	P.I	I.F Central intermediary metabolism	Putative carboxynorspermidine decarboxylase	K13747	Q92TG9
SMb21632		CDS	1.27554	0.00573901	1.35479	0.00176271	P.I	I.I.1 fatty acid	Putative 3-hydroxyacyl-CoA dehydrogenase		Q92TG8
SMb21633	paaG	CDS			1.66209	0.00420562	P.III	I.I.4 carbon compounds	Putative enoyl-CoA hydratase	K15866	Q92TG7
SMb21636	paaE	CDS	2.32304	0.00602255			P.II	I.I.4 carbon compounds	Probable phenylacetic acid degradation oxidoreductase	K02613	Q92TG4
SMb21643	agaL2	CDS	1.4089	0.000512143	2.63571	0.000512143	P.I	I.I.4 carbon compounds	Probable alpha-galactosidase (melibiase)	K07406	Q92TF8
SMb21644	agpD	CDS	1.26497	0.00889017	2.03313	0.000512143	P.I	IV.D.3 carbohydrates, organic acids, alcohols	ABC-type alpha-galactoside transport system,duplicated ATPase component	K25099	Q92TF7
SMb21652	lacE	CDS	-1.8881	0.000512143			P.II	IV.D.3 carbohydrates, organic acids, alcohols	Lactose ABC transporter,periplasmic solute-binding protein	K10188	Q926I0
SMb21655	lacZ1	CDS	-1.4018	0.00482954			P.II	I.I.4 carbon compounds	Beta-galactosidase	K01190	Q92XF7
SMb21678		CDS			1.82804	0.00420562	P.III	VI.D Unknown	Hypothetical protein		Q92UD9
SMb21690	exoW	CDS	4.45388	0.000512143	1.94984	0.000512143	P.I	III.A.1 surface polysaccharides/antigens	Glucosyltransferase	K16562
SMb21691		CDS	2.62677	0.00777209	-1.40112	0.00661481	P.I	I Small Molecule Metabolism	Alkanesulfonate monooxygenase	K24116	Q92TM7
SMb21695		CDS	2.5343	0.000512143	1.46804	0.000512143	P.I	VI.C Hypothetical/Global similarity	Hypothetical protein		Q92VT2
SMb22009		CDS			1.5595	0.00137247	P.III	I.C Fatty acid biosynthesis	Acyl carrier protein (ACP).		B2FDC9
SMb22012		CDS			1.3651	0.0009592	P.III	VI.C Hypothetical/Global similarity	Hypothetical protein		B2FDD2
SMb22014		CDS			1.02499	0.00777209	P.III	VI.A Not classified regulator	Putative two-component response regulator		B2FDD6
SMb22016		CDS			-2.67398	0.000512143	P.III	VI.B Hypothetical/Partial similarity	Hypothetical protein		B2FDD9
SMb22017		CDS	-2.63122	0.000512143			P.II	VI.A Not classified regulator	Mutated LacI family transcriptional regulator		B2FDE0
SMb22023	groES5	CDS			-1.84805	0.00482954	P.III	IV.B Chaperoning	1 kDa chaperonin	K04078	B2FDD5
SMb22024	cyoD	CDS	-4.09314	0.00720208			P.II	I.H.3 aerobic respiration	Cytochrome o ubiquinol oxidase protein CyoD	K02300	B2FDD8
SMb22025		CDS	3.66413	0.000512143	4.72215	0.000512143	P.I	VI.C Hypothetical/Global similarity	Hypothetical protein		B2FDD3
SMb23013		ncRNA			1.87439	0.000512143	P.III		Cobalamin riboswitch, Rfam_RF174
SMb23074		ncRNA	1.92054	0.000512143	3.28313	0.000512143	P.I
SMb23138		ncRNA	2.37382	0.00213505			P.II
SMb23140		CDS			1.42043	0.000512143	P.III
SMb23242		CDS			-2.40387	0.00285916	P.III
SMb23399		CDS	1.76697	0.00250247	2.23757	0.000512143	P.I
SMb24035		ncRNA	-1.26868	0.00632638			P.II
SMc00003		CDS	-1.08933	0.00482954			P.II	IV.B Chaperoning	Putative chaperone protein		Q92RH6
SMc00007	aroC	CDS	-1.40263	0.000512143			P.II	I.A.5 chorismate	Probable chorismate synthase	K01736	Q92RH3
SMc00009	ctaC	CDS	-2.31845	0.000512143			P.II	I.H.3 aerobic respiration	Putative cytochrome C oxidase subunit II	K02275	Q92RH0
SMc00010	ctaD	CDS	-1.72932	0.0009592			P.II	I.H.3 aerobic respiration	Putative cytochrome C oxidase polypeptide I transmembrane protein	K02274	Q92RG9
SMc00013	ctaE	CDS	-1.48883	0.0009592			P.II	I.H.3 aerobic respiration	Putative cytochrome C oxidase subunit III transmembrane protein	K02276	Q92RG5
SMc00014		CDS	-1.91025	0.00285916			P.II	VI.C Hypothetical/Global similarity	Hypothetical/unknown transmembrane protein		Q92RG4
SMc00016	ispH	CDS	-1.6489	0.000512143			P.II	I Small Molecule Metabolism	Probable 4-hydroxy-3-methylbut-2-enyl diphosphate reductase	K03527	Q92RG2
SMc00019		CDS	1.32566	0.000512143	1.18774	0.00213505	P.I	VI.C Hypothetical/Global homology	Conserved hypothetical protein	K07735	Q92RF8
SMc00022		CDS			1.10716	0.00452512	P.III	VI.C Hypothetical/Global homology	Conserved hypothetical protein		Q92RE9
SMc00025	ppdK	CDS			1.39189	0.0009592	P.III	I.F.13 gluconeogenesis	Putative pyruvate phosphate dikinase	K01006	Q59754
SMc00033		CDS	3.52894	0.000512143	3.04654	0.000512143	P.I	VI.A Not classified regulator	Diguanylate cyclase/phosphodiesterase		Q92RD6
SMc00034		CDS	1.78359	0.000512143	1.86395	0.000512143	P.I	I Small Molecule Metabolism	Putative quinone oxidoreductase		Q92RD5
SMc00035		CDS	-1.20166	0.00285916			P.II	VI.C Hypothetical/Global homology	Conserved hypothetical protein		Q92RD4
SMc00037	lsrA	CDS			-1.11974	0.00354496	P.III	VI.A Not classified regulator	Transcription regulator LysR family		Q92RD2
SMc00039		CDS	-1.24757	0.00320928			P.II	VI.C Hypothetical/Global homology	Conserved hypothetical protein		Q92KJ2
SMc00040		CDS	1.62876	0.000512143	3.18718	0.000512143	P.I	IV.G.4 detoxification	Putative organic hydroperoxide resistance protein	K04063	Q92RC9
SMc00041		CDS	1.43699	0.000512143	2.98177	0.000512143	P.I	VI.C Hypothetical/Global homology	Conserved hypothetical protein		Q92KJ1
SMc00045	cycF	CDS	3.55876	0.000512143	4.29561	0.000512143	P.I	I.G.1 electron transport	Probable Cytochrome c556		Q92RB8
SMc00048		CDS	2.23358	0.000512143	1.27687	0.00213505	P.I	VI.C Hypothetical/Global homology	Conserved hypothetical protein	K14061	Q92RA8
SMc00049		CDS			1.53018	0.000512143	P.III	VI.C Hypothetical/Global similarity	Hypothetical protein		Q92RA7
SMc00051	phaA2	CDS	-1.93689	0.000512143			P.II	IV.D.4 cations	Probable Na(+)/H(+)-antiporter	K05565	Q92RA3
SMc00054	phaD2	CDS	-1.77413	0.000512143			P.II	IV.D.4 cations	Probable Na(+)/H(+)-antiporter	K05568	Q92RA0
SMc00058	mucR	CDS	-2.14316	0.000512143			P.II	III.A.1 surface polysaccharides/antigens	Transcriptional regulator of exopolysaccharide biosynthesis		P55323
SMc00062		CDS	5.23695	0.000512143			P.II	VI.B Hypothetical/Partial homology	Hypothetical protein		Q92KI7
SMc00063		CDS	5.64646	0.00250247			P.II	VI.C Hypothetical/Global homology	Conserved hypothetical protein		Q92KI6
SMc00065	feuN	CDS	2.73199	0.000512143			P.II	VI.A Not classified regulator	Modulator of the two component system FeuPQ		Q92R92
SMc00067	lppA	CDS	-1.05451	0.00482954			P.II	III.B.2 membrane, outer	Putative outer membrane protein precursor		Q92R89
SMc00073		CDS			1.36567	0.00387636	P.III	VI.C Hypothetical/Global homology	Conserved hypothetical protein		Q92KJ9
SMc00078		CDS	-2.4195	0.000512143			P.II	IV.D.2 amino acids, amines, peptides	Putative methionine ABC transporter,periplasmic solute-binding protein	K01999	Q92RF4
SMc00079		CDS	-1.57689	0.000512143			P.II	I Small Molecule Metabolism	HAD-superfamily hydrolase		Q92RF3
SMc00084		CDS	2.92334	0.000512143	2.35694	0.000512143	P.I	VI.C Hypothetical/Global similarity	Hypothetical protein		Q92RE6
SMc00085	surf1	CDS	-1.92622	0.000512143			P.II	I.H.3 aerobic respiration	Putative cytochrome oxidase complex biogenesis factor	K14998	Q92RG3
SMc00086	cycG	CDS	1.94061	0.000512143			P.II	I.G.1 electron transport	Putative diheme cytochrome C-type signal peptide protein		Q92RB7
SMc00087		CDS			1.11985	0.00213505	P.III	IV.G.2 drug/analog sensitivity and resistance	Probable metallo-beta-lactamase		Q92RE4
SMc00088		CDS	-2.77103	0.000512143	-1.55138	0.000512143	P.I	VI.C Hypothetical/Global homology	Hypothetical/unknown transmembrane protein		Q92RE1
SMc00092	cysH	CDS			-1.37074	0.000512143	P.III	I.F.14 amino acids	Phosphoadenosine phosphosulfate reductase	K00390	P56891
SMc00096		CDS	1.74736	0.000512143			P.II	VI.C Hypothetical/Global homology	Conserved hypothetical protein,signal peptide		Q92KJ4
SMc00097	gst2	CDS	-1.64089	0.000512143	-1.15726	0.00137247	P.I	VI MISCELLANEOUS	Putative glutathione S-transferase	K00799	Q92RD1
SMc00101	dkgB	CDS			1.29165	0.000512143	P.III	I Small Molecule Metabolism	Putative 2,5-diketo-D-gluconic acid reductase B		Q92RC6
SMc00108		CDS	-2.66247	0.000512143	-1.38101	0.000512143	P.I	I Small Molecule Metabolism	Putative acetyltransferase		Q92RB6
SMc00114	ptrB	CDS	-1.13447	0.00602255			P.II	II.A.4 degradation of proteins, peptides, glycopeptides	Probable protease II oligopeptidase B hydrolase serine protease	K01354	Q92RB0
SMc00120		CDS	-1.57857	0.000512143	-1.20924	0.00889017	P.I	VI.C Hypothetical/Global homology	Conserved hypothetical protein		Q92R97
SMc00123		CDS			1.78665	0.000512143	P.III	VI.C Hypothetical/Global homology	Conserved hypothetical protein		Q92R93
SMc00129	feuQ	CDS	2.50349	0.00354496			P.II	IV.D.5 incorporation metal ions	Probable sensor histidine kinase		Q92R90
SMc00134		CDS	-2.06738	0.000512143			P.II	VI.C Hypothetical/Global homology	Conserved hypothetical protein	K00568	Q92PA3
SMc00137	usg1	CDS	2.21666	0.000512143	2.7496	0.000512143	P.I	VI.C Hypothetical/Global homology	Conserved hypothetical protein		Q92PA6
SMc00141		CDS	5.59113	0.000512143			P.II	VI.B Hypothetical/Partial homology	Hypothetical protein		Q92K87
SMc00150		CDS	-1.47635	0.000512143			P.II	VI.C Hypothetical/Global homology	Conserved hypothetical protein,signal peptide	K21470	Q92K91
SMc00154	gor	CDS	-1.31725	0.000512143			P.II	I.B.6 thioredoxin, glutaredoxin, glutathione	Probable glutathione reductase	K00383	Q92PC0
SMc00155	aroF,dhs	CDS	-1.64134	0.000512143			P.II	I.A.5 chorismate	Probable phospho-2-dehydro-3-deoxyheptonate aldolase	K01626	Q92PC1
SMc00163		CDS	-1.30237	0.000512143			P.II	VI.A Not classified regulator	Putative transcriptional regulator	K02529	Q92PC5
SMc00166	bluB	CDS			1.25254	0.00544021	P.III	I.B.3 cobalamin	Putative cob(II)yrinic acid a,c-diamide reductase	K04719	Q92PC8
SMc00168	sinI	CDS	3.06683	0.000512143	3.8301	0.000512143	P.I	VI.A Not classified regulator	N-acyl-L-homoserine lactone synthetase	K22968	Q92PD0
SMc00169	dme	CDS	-1.58106	0.000512143			P.II	I.F.13 gluconeogenesis	NAD-malic enzyme oxidoreductase	K00029	O30807
SMc00170	sinR	CDS	2.1347	0.000512143	1.92893	0.000512143	P.I	VI.A Not classified regulator	Quorum sensing system,AHL autoinducer-binding,luxR family,regulator of sinI	K19733	Q92PD1
SMc00171		CDS	7.68383	0.000512143	7.50473	0.000512143	P.I	II.B.1 phospholipides	Phospholipase C		Q92PD2
SMc00180	hemF	CDS	-3.37112	0.000512143	-1.47885	0.000512143	P.I	I.B.4 heme, porphyrin	Probable coproporphyrinogen III oxidase,aerobic protein	K00228	Q92PD8
SMc00187	fbcF	CDS	-2.05351	0.000512143			P.II	I.H.3 aerobic respiration	Probable ubiquinol-cytochrome C reductase iron-sulfur subunit	K00411	Q92PE6
SMc00188	fbcB	CDS	-1.81347	0.000512143			P.II	I.H.3 aerobic respiration	Probable cytochrome B transmembrane protein	K00412	Q92PE7
SMc00189	fbcC	CDS	-1.92141	0.000512143			P.II	I.H.3 aerobic respiration	Putative cytochrome C1 protein	K00413	Q92PE8
SMc00194		CDS	1.26482	0.000512143	1.75464	0.000512143	P.I	VI.C Hypothetical/Global homology	Conserved hypothetical protein,signal peptide		Q92KA0
SMc00198		CDS	5.82596	0.000512143	1.51787	0.0009592	P.I	VI.D Unknown	Hypothetical/unknown protein		Q92PB0
SMc00227		CDS	-2.33637	0.000512143			P.II	VI.C Hypothetical/Global homology	Conserved hypothetical protein	K09159	Q92PS8
SMc00234	ppiD	CDS	-1.60851	0.000512143			P.II	IV.B Chaperoning	Putative peptidyl-prolyl cis-trans isomerase	K03770	Q92PS1
SMc00235	trpD	CDS	-1.40987	0.000512143			P.II	I.A.6 tryptophan	Probable anthranilate phosphoribosyltransferase	K00766	Q92PS0
SMc00241		CDS	-1.49852	0.000512143			P.II	VI.A Not classified regulator	Putative transcriptional regulator		Q92PR5
SMc00249		CDS	-1.05717	0.00573901			P.II	VI.C Hypothetical/Global similarity	Hypothetical protein		Q92PQ8
SMc00251		CDS			1.35898	0.0009592	P.III	VI.C Hypothetical/Global homology	Conserved hypothetical protein		Q92KC3
SMc00252		CDS	8.15378	0.000512143	2.92223	0.000512143	P.I	VI.C Hypothetical/Global homology	Conserved hypothetical protein,signal peptide		Q92KC2
SMc00254		CDS			1.48371	0.000512143	P.III	VI.C Hypothetical/Global homology	Conserved hypothetical protein		Q92PQ5
SMc00255		CDS	-2.13166	0.0009592			P.II	VI.B Hypothetical/Partial similarity	Hypothetical protein		Q92PQ3
SMc00257	ropB2	CDS			2.06356	0.000512143	P.III	III.B.2 membrane, outer	Probable outer-membrane protein	K16079	Q92PQ1
SMc00264		CDS	-1.80377	0.000512143	-1.59808	0.00452512	P.I	I Small Molecule Metabolism	Dehydrogenase		Q92PP4
SMc00265		CDS	-2.94506	0.000512143	-2.32154	0.000512143	P.I	IV.D.3 carbohydrates, organic acids, alcohols	Putative oxobutyric acid and 3-methyl oxovaleric acid ABC transporter,periplasmic solute-binding component		Q92PP3
SMc00277		CDS	1.44765	0.00452512			P.II	VI.C Hypothetical/Global similarity	Hypothetical protein		Q92PN2
SMc00279		CDS	1.86818	0.000512143	1.54943	0.0091608	P.I	VI.C Hypothetical/Global homology	Hypothetical integral membrane protein		Q92KC0
SMc00280		CDS			2.88468	0.00602255	P.III	VI.C Hypothetical/Global homology	Conserved hypothetical protein		Q92PN0
SMc00286		CDS	5.23054	0.000512143			P.II	VI.B Hypothetical/Partial homology	Calcium-binding protein		Q92KB8
SMc00290	gloA	CDS			1.19272	0.00213505	P.III	I.F.18 pool of unassigned individual reversibles reactions	Probable lactoylglutathione lyase methylglyoxalase	K01759	Q92PM1
SMc00292	recJ	CDS	-1.96426	0.000512143			P.II	II.A.1 degradation of DNA	Probable single-stranded-DNA-specific exonuclease	K07462	Q92PM0
SMc00293	thrA	CDS	-1.86065	0.000512143			P.II	I.A.20 threonine	Probable homoserine dehydrogenase	K00003	Q92PL9
SMc00294	aatC	CDS	-1.4278	0.000512143			P.II	I.F.14 amino acids	Probable aminotransferase	K14261	O87320
SMc00295		CDS			1.04671	0.00573901	P.III	VI.B Hypothetical/Partial homology	Hypothetical protein		Q92PL8
SMc00296	phbC	CDS			1.12393	0.00285916	P.III	II.B Macromolecule synthesis, modification	Poly-beta-hydroxybutyrate polymerase	K03821	P50176
SMc00298	map1	CDS	-1.52383	0.000512143			P.II	II.B.7 proteins and peptides - translation and modification	Putative methionine aminopeptidase	K01265	Q92PL7
SMc00300	sthA	CDS			2.41522	0.000512143	P.III	I.B.9 pyridine nucleotide	Probable soluble pyridine nucleotide transhydrogenase	K00322	Q92PL5
SMc00302		CDS	-1.00986	0.00861167			P.II	VI.C Hypothetical/Global homology	Conserved hypothetical protein		Q92PL3
SMc00316		CDS	-1.48393	0.000512143			P.II	I Small Molecule Metabolism	Oxidoreductase UbiH/COQ6 family	K03185	Q7APD3
SMc00320	rbfA	CDS	-3.49396	0.000512143	-2.03475	0.000512143	P.I	II.B Macromolecule synthesis, modification	Probable ribosome-binding factor A,rRNA processing protein	K02834	Q92SW3
SMc00321	truB	CDS	-3.53661	0.000512143	-2.42088	0.000512143	P.I	II.D.1 amino acyl tRNA synthesis; tRNA modification	Probable tRNA pseudouridine synthase B	K03177	Q92SW2
SMc00323	rpsO	CDS	-2.05476	0.000512143			P.II	II.C.2 ribosomal proteins - synthesis, modification	Probable 3S ribosomal protein S15	K02956	Q92SW1
SMc00324	pnp	CDS	-3.02925	0.000512143	-1.68189	0.000512143	P.I	II.B.6 RNA synthesis, modification , DNA transcription	Probable polyribonucleotide nucleotidyltransferase	K00962	Q92SW0
SMc00326	fabI2	CDS	-1.39355	0.00285916			P.II	I.C Fatty acid biosynthesis	Putative enoyl-acyl-carrier-protein reductase NADH	K00208	P58381
SMc00327	fabB	CDS	-1.44389	0.000512143			P.II	I.C Fatty acid biosynthesis	Probable 3-oxoacyl-acyl-carrier-protein synthase I	K00647	Q92SV9
SMc00328	fabA	CDS	-1.27614	0.0009592			P.II	I.C Fatty acid biosynthesis	Probable 3-hydroxydecanoyl-acyl-carrier-protein dehydratase	K01716	Q92SV8
SMc00329	irr	CDS	-1.58736	0.000512143			P.II	I.B.4 heme, porphyrin	Putative iron response regulator	K09826	Q92SV7
SMc00331		CDS	-1.8754	0.000512143	-1.95372	0.000512143	P.I	VI.B Hypothetical/Partial homology	Hypothetical transmembrane protein		Q92KS9
SMc00332		CDS	-1.73817	0.000512143	-1.26186	0.00137247	P.I	VI.B Hypothetical/Partial homology	Hypothetical protein		Q92KS8
SMc00335	rpsA	CDS	-3.78368	0.000512143	-2.9543	0.000512143	P.I	III.C.2 ribosomal proteins - synthesis, modification	3S ribosomal protein S1	K02945	P14129
SMc00338		CDS	1.97683	0.000512143	1.57359	0.000512143	P.I	VI.C Hypothetical/Global homology	Conserved hypothetical protein		Q92SV2
SMc00342	rnd2	CDS	-2.32011	0.000512143			P.II	II.A.2 degradation of RNA	Putative ribonuclease D	K03684	Q92SU9
SMc00347	rnk1	CDS	-1.23725	0.00661481			P.II	I.F.9 nucleotide interconversions	Putative regulator of nucleoside diphosphate kinase	K06140	Q92SU5
SMc00348		CDS	-1.75605	0.000512143			P.II	VI.C Hypothetical/Global homology	Conserved hypothetical protein	K19164	Q92SU4
SMc00349	lepA	CDS	-2.837	0.000512143	-1.55203	0.000512143	P.I	I.B.7 proteins and peptides - translation and modification	Probable GTP-binding protein membrane	K03596	Q92SU3
SMc00350		CDS	1.95765	0.00513758			P.II	IV.D Transport of small molecules	Putative transport transmembrane protein		Q92SU2
SMc00357	efp	CDS	-2.38137	0.000512143			P.II	II.B.7 proteins and peptides - translation and modification	Probable elongation factor P	K02356	Q92ST6
SMc00360		CDS	1.37631	0.00137247	2.13561	0.000512143	P.I	VI.C Hypothetical/Global homology	Conserved hypothetical protein		Q92ST4
SMc00362	infC	CDS	-1.84922	0.00320928			P.II	II.B.7 proteins and peptides - translation and modification	Probable translation initiation factor IF-3 protein	K02520	Q92ST3
SMc00364	rplT	CDS	-2.71423	0.000512143	-1.16537	0.00513758	P.I	III.C.2 ribosomal proteins - synthesis, modification	Probable 5S ribosomal protein L2	K02887	Q92ST1
SMc00365	pheS	CDS	-2.23801	0.000512143	-1.75974	0.000512143	P.I	II.D.1 amino acyl tRNA synthesis; tRNA modification	Probable phenylalanyl-tRNA synthetase alpha chain	K01889	Q92ST0
SMc00366	pheT	CDS	-2.14474	0.000512143	-1.64497	0.000512143	P.I	II.D.1 amino acyl tRNA synthesis; tRNA modification	Probable phenylalanyl-tRNA synthetase beta chain	K01890	Q92SS9
SMc00367		CDS	-1.16886	0.00777209			P.II	VI.C Hypothetical/Global homology	Conserved hypothetical protein		Q92SS8
SMc00371		CDS	4.48711	0.000512143	2.75547	0.000512143	P.I	VI.C Hypothetical/Global homology	Conserved hypothetical protein		Q92SS4
SMc00374		CDS	3.23589	0.000512143	3.48503	0.000512143	P.I	I Small Molecule Metabolism	Putative oxidoreductase transmembrane protein		Q92SS1
SMc00387	tatA	CDS			1.34175	0.000512143	P.III	I.A.7 tyrosine	Probable aspartate/tyrosine/aromatic aminotransferase	K00832	Q02636
SMc00394	guaA	CDS	-2.06939	0.000512143	-1.16127	0.00513758	P.I	I.D.2 purine ribonucleotide biosynthesis	Probable GMP synthase glutamine-hydrolyzing protein	K01951	Q92SQ3
SMc00399	corA1	CDS	-1.92944	0.000512143			P.II	IV.D.4 Cations	Probable magnesium and cobalt transport transmembrane protein	K03284	Q92SP8
SMc00401		CDS			-1.73907	0.00137247	P.III	VI.C Hypothetical/Global homology	Conserved hypothetical protein		Q92SP7
SMc00402		CDS	-1.26058	0.000512143	-1.55702	0.000512143	P.I	VI.B Hypothetical/Partial homology	Hypothetical signal peptide protein	K07231	Q92KS2
SMc00404		CDS	4.52965	0.000512143	1.5941	0.000512143	P.I	VI.B Hypothetical/Partial homology	Hypothetical protein	K03642	Q92KS1
SMc00407	gst4	CDS	-1.46184	0.000512143			P.II	VI MISCELLANEOUS	Putative glutathione S-transferase	K00799	Q92SP3
SMc00410		CDS	-1.76582	0.000512143			P.II	I Small Molecule Metabolism	Probable NADH-ubiquinone oxidoreductase	K00329, K00356	Q92SP0
SMc00412	pyrF	CDS	-1.33743	0.00602255			P.II	I.D.1 pyrimidine ribonucleotide biosynthesis	Probable orotidine 5'-phosphate decarboxylase	K01591	Q92SN8
SMc00427	prfC	CDS	-2.66984	0.000512143	-1.74488	0.000512143	P.I	II.B.7 proteins and peptides - translation and modification	Probable peptide chain release factor RF-3 protein	K02837	Q92SM5
SMc00429		CDS	-1.27381	0.0009592			P.II	VI.A Not classified regulator	Putative transcriptional regulator		Q92SM3
SMc00433	iolE	CDS	-1.40903	0.000512143			P.II	I.I.4 carbon compounds	Putative myo-inositol catabolism protein	K03335	Q92SL9
SMc00434			-2.31842	0.00250247			P.II	tRNA	Leu-CAG	K14228
SMc00454		CDS	-1.47507	0.00387636			P.II	VI.B Hypothetical/Partial homology	Hypothetical protein		Q92KI9
SMc00456		CDS	-1.58313	0.0009592			P.II	VI.C Hypothetical/Global homology	Conserved hypothetical protein,signal peptide		Q52968
SMc00458	feuP	CDS	2.99273	0.000512143			P.II	IV.D.5 incorporation metal ions	Response regulators consisting of a CheY-like receiver domain and a winged-helix DNA-binding domain	K02483	Q92R91
SMc00460		CDS	-1.32334	0.00213505			P.II	VI.C Hypothetical/Global homology	Conserved hypothetical protein	K09947	Q92SP9
SMc00461	dut	CDS	-1.92952	0.00805017	-1.27209	0.00285916	P.I	I.F.2 2-prime-deoxyribonucleotide metabolism	Probable deoxyuridine 5'-triphosphate nucleotidohydrolase	K01520	Q92SM6
SMc00469	dksA	CDS			2.37028	0.000512143	P.III	II.B.8 DNA - replication, repair, restr./modif.	Putative DnaK suppresor protein	K06204	Q92PF8
SMc00472		CDS	-1.08217	0.00176271			P.II	VI.C Hypothetical/Global homology	Conserved hypothetical protein	K16329	Q92PG0
SMc00475	alaS	CDS	-2.26645	0.000512143			P.II	II.D.1 amino acyl tRNA synthesis; tRNA modification	Alanyl-tRNA ligase	K01872	P27866
SMc00480	icd	CDS	-1.44411	0.00137247			P.II	I.H.6 TCA cycle	Probable isocitrate dehydrogenase [NADP] protein	K00031	Q92PG6
SMc00481		CDS	1.02436	0.00632638			P.II	VI.B Hypothetical/Partial homology	Hypothetical transmembrane protein		Q92KA3
SMc00484		CDS	-1.52779	0.000512143			P.II	VI.B Hypothetical/Partial homology	Hypothetical protein	K06915	Q92KA4
SMc00485	rpsD	CDS	-3.90394	0.000512143	-2.47133	0.000512143	P.I	III.C.2 ribosomal proteins - synthesis, modification	Probable 3S ribosomal subunit protein S4	K02986	Q92PG9
SMc00486	glsA	CDS	-1.48643	0.000512143			P.II	I.A.18 glutamine	Probable glutaminase A	K01425	Q92PH0
SMc00488	purL	CDS	-1.8318	0.000512143			P.II	I.D.2 purine ribonucleotide biosynthesis	Probable phosphoribosylformyl glycinamidine synthetase II	K23269	Q92PH7
SMc00489		CDS	-1.5403	0.000512143			P.II	VI.C Hypothetical/Global homology	Hypothetical/unknown signal peptide protein	K12976	Q92PH8
SMc00490		CDS	-1.33774	0.000512143	-1.59301	0.000512143	P.I	VI.A Not classified regulator	Transcription regulator GntR family		Q92PH9
SMc00491		CDS			-2.4535	0.00250247	P.III	VI.B Hypothetical/Partial homology	Hypothetical protein		Q92KA5
SMc00492		CDS	-1.44216	0.000512143	-1.4882	0.000512143	P.I	VI.C Hypothetical/Global homology	Conserved hypothetical transmembrane protein		Q92PI0
SMc00493	purQ	CDS	-1.36796	0.000512143			P.II	I.D.2 purine ribonucleotide biosynthesis	Probable phosphoribosylformyl glycinamidine synthase I	K23265	Q92PI1
SMc00494		CDS	-1.85388	0.000512143			P.II	VI.C Hypothetical/Global homology	Conserved hypothetical protein	K23264	Q92PI2
SMc00495	purC	CDS	-1.14464	0.00354496			P.II	I.D.2 purine ribonucleotide biosynthesis	Probable phosphoribosylaminoimidazole-succinocarboxamide synthase (SAICAR synthetase)	K01923	Q92PI3
SMc00496		CDS			1.58745	0.00213505	P.III	VI.B Hypothetical/Partial homology	Hypothetical protein		Q92KA6
SMc00501		CDS	2.00993	0.0009592			P.II	VI.C Hypothetical/Global homology	Conserved hypothetical protein		Q92PI7
SMc00508	purB	CDS	-2.01152	0.000512143			P.II	I.D.2 purine ribonucleotide biosynthesis	Putative adenylosuccinate lyase	K01756	Q92PJ3
SMc00514		CDS	-1.07704	0.00832418			P.II	I Small Molecule Metabolism	Putative monooxygenase	K13786	Q92PJ7
SMc00516		CDS			1.28649	0.00250247	P.III	VI.C Hypothetical/Global homology	Conserved hypothetical protein	K07161	Q92PJ9
SMc00519		CDS			1.61993	0.000512143	P.III	VI.B Hypothetical/Partial homology	Hypothetical protein	K07141	Q92KB1
SMc00522	rhlE1	CDS	-1.58968	0.000512143			P.II	II.B.6 RNA synthesis, modification , DNA transcription	Putative ATP-dependent RNA helicase	K03732, K11927	Q92PK3
SMc00530	sufB	CDS	-1.13986	0.00482954	-1.30436	0.0009592	P.I	VI.C Hypothetical/Global homology	UPF51 family protein	K09014	Q92PK9
SMc00531	sufC	CDS			-1.39304	0.000512143	P.III	IV.D Transport of small molecules	Putative ATP-dependent transporter	K09013	Q92PL0
SMc00532	sufD	CDS	-1.4063	0.0009592	-1.39222	0.000512143	P.I	VI.C Hypothetical/Global homology	UPF51 family protein	K09015	Q92PL1
SMc00533	sufS	CDS	-1.47449	0.000512143	-1.21967	0.00137247	P.I	I.B Biosynthesis of cofactors, carriers	Probable cysteine desulfurase	K11717	Q92PL2
SMc00535		CDS	-1.52875	0.00176271			P.II	I Small Molecule Metabolism	Inositol monophosphatase family protein		Q92PH2
SMc00536		CDS	-1.06366	0.00749637	-1.36328	0.000512143	P.I	IV.D Transport of small molecules	MFS-type transport protein	K07552	Q92PH3
SMc00537		CDS	-1.77411	0.000512143			P.II	IV.D Transport of small molecules	MFS-type transport protein	K07552	Q92PH4
SMc00538		CDS			1.07904	0.00573901	P.III	VI.C Hypothetical/Global homology	Hypothetical protein	K07390	Q92PH5
SMc00548		CDS	-1.48487	0.0091608			P.II	VI.C Hypothetical/Global homology	Conserved hypothetical signal peptide protein		Q92PF4
SMc00551	psd	CDS	-1.08924	0.00354496			P.II	II.B.1 phospholipides	Probable phosphatidylserine decarboxylase	K01613	Q9FDI9
SMc00554	purF	CDS	-1.20371	0.00320928			P.II	I.D.2 purine ribonucleotide biosynthesis	Probable amidophosphoribosyltransferase,prpp amidotransferase	K00764	Q92R10
SMc00557	alr	CDS	-1.71893	0.000512143			P.II	I.A.3 alanine	Putative alanine racemase	K01775	Q92R07
SMc00561	dnaB	CDS	-1.89521	0.000512143			P.II	II.B.8 DNA - replication, repair, restr./modif.	Probable replicative DNA helicase	K02314	Q92R03
SMc00565	rplI	CDS	-3.93231	0.000512143	-3.39232	0.000512143	P.I	III.C.2 ribosomal proteins - synthesis, modification	Probable 5S ribosomal protein L9	K02939	Q92QZ9
SMc00566		CDS	-2.4335	0.000512143	-2.70583	0.000512143	P.I	VI.B Hypothetical/Partial homology	Hypothetical transmembrane protein		Q92KG8
SMc00567	rpsR	CDS	-4.05507	0.000512143	-3.25451	0.000512143	P.I	III.C.2 ribosomal proteins - synthesis, modification	Putative 3S ribosomal protein S18	K02963	Q92QZ8
SMc00568	rpsF	CDS	-4.24236	0.000512143	-3.41687	0.000512143	P.I	III.C.2 ribosomal proteins - synthesis, modification	Putative 3S ribosomal protein S6	K02990	Q92QZ7
SMc00571	fabD	CDS	-1.46776	0.000512143			P.II	I.I.1 fatty acid	Probable malonyl CoA-acyl carrier protein transacylase	K00645	Q7APD9
SMc00572	fabG	CDS	-1.734	0.000512143			P.II	I.I.1 fatty acid	Probable 3-oxoacyl-acyl-carrier protein reductase	K00059	Q7APD8
SMc00573	acpP	CDS	-1.4712	0.0009592			P.II	I.C Fatty acid biosynthesis	Acyl carrier protein	K02078	P19372
SMc00574	fabF	CDS	-1.31299	0.000512143			P.II	I.I.1 fatty acid	Probable 3-oxoacyl-acyl-carrier-protein synthase II	K09458	P56902
SMc00576		CDS	-1.54365	0.000512143			P.II	VI.C Hypothetical/Global homology	Conserved hypothetical protein		Q92QZ3
SMc00590		CDS	-2.24927	0.000512143	-1.432	0.00861167	P.I	IV.D Transport of small molecules	Putative ABC transporter ATP-binding protein	K06158	Q92QY3
SMc00592		CDS			-1.48628	0.0069235	P.III	VI.B Hypothetical/Partial homology	Hypothetical,transmembrane protein		Q92KG4
SMc00594	ligE	CDS	-1.65663	0.000512143			P.II	I.I.4 carbon compounds	Putative beta-etherase (beta-aryl ether cleaving enzyme) protein	K00799	Q92QY0
SMc00604	ropB1	CDS			-1.84598	0.000512143	P.III	III.B.2 membrane, outer	Probable outer membrane protein	K16079	Q92QX0
SMc00608		CDS	-1.03406	0.00832418			P.II	VI.C Hypothetical/Global homology	Conserved hypothetical protein	K07115	Q92QW7
SMc00611		CDS	2.06409	0.000512143	1.76566	0.000512143	P.I	VI.B Hypothetical/Partial homology	Hypothetical transmembrane protein	K14205	Q92KG2
SMc00614	purN	CDS	-1.83908	0.00749637			P.II	I.D.2 purine ribonucleotide biosynthesis	Probable phosphoribosylglycinamide formyltransferase gart protein	K11175	Q92QW3
SMc00615	purM	CDS	-2.04651	0.000512143			P.II	I.D.2 purine ribonucleotide biosynthesis	5'-phosphoribosyl-5-aminoimidazole synthetase	K01933	Q92QW2
SMc00618	ppk	CDS	2.73994	0.000512143	3.2722	0.000512143	P.I	I.F.20 phosphorus metabolism	Putative polyphosphate kinase	K00937	Q92QV9
SMc00619	ppx1	CDS	2.09431	0.000512143	2.86143	0.000512143	P.I	I.F.20 phosphorous metabolism	Putative exopolyphosphatase	K01524	Q92KG0
SMc00620		CDS	8.17696	0.000512143	8.72311	0.000512143	P.I	VI.C Hypothetical/Global homology	Hypothetical signal peptide protein		Q92QV8
SMc00621	cya2,cyaB	CDS			-1.26607	0.00749637	P.III	I.E.1 global regulatory functions	Adenylate cyclase 2 protein	K01768	Q52915
SMc00622	rnd1	CDS	-2.35937	0.000512143	-1.26674	0.000512143	P.I	II.A.2 degradation of RNA	Probable ribonuclease D	K03684	Q92QV7
SMc00637	glmM	CDS	-1.02926	0.00832418			P.II	I Small Molecule Metabolism	Phosphoglucosamine mutase	K03431	Q92M99
SMc00638		CDS	-1.36283	0.00661481			P.II	III.B.2 membrane, outer	Putative heat resistant agglutinin 1 protein		Q92MA0
SMc00639		CDS	-1.59431	0.000512143			P.II	III.B.2 membrane, outer	Putative heat resistant agglutinin 1 signal peptide protein		Q92MA1
SMc00640	serC	CDS	-4.7583	0.000512143	-2.35055	0.000512143	P.I	I.A.10 serine	Putative phosphoserine aminotransferase	K00831	Q92MA2
SMc00641	serA	CDS	-5.76001	0.000512143	-2.8884	0.000512143	P.I	I.A.10 serine	Putative D-3-phosphoglycerate dehydrogenase	K00058	Q92MA3
SMc00642		CDS	-3.01438	0.000512143	-2.18343	0.000512143	P.I	VI.C Hypothetical/Global homology	Hypothetical transmembrane protein		Q92MA4
SMc00643	purA	CDS	-1.39897	0.0009592	-1.15557	0.00602255	P.I	I.D.2 purine ribonucleotide biosynthesis	Probable adenylosuccinate synthetase IMP--aspartate ligase	K01939	Q92MA5
SMc00647	rluD	CDS	-2.09165	0.000512143			P.II	III.C.1 ribosomes - maturation and modification	Putative ribosomal large subunit pseudouridine synthase	K06180	Q92MA7
SMc00649		CDS	-1.10938	0.00250247			P.II	II.B Macromolecule synthesis, modification	tRNA/rRNA methyltransferase		Q92MA9
SMc00653		CDS	-0.989045	0.00889017			P.II	VI.A Not classified regulator	Putative 2-component receiver domain protein	K03413	Q92MB1
SMc00655		CDS	-1.37822	0.0009592			P.II	VI.B Hypothetical/Partial homology	Hypothetical protein		Q92JY7
SMc00660		CDS	1.81275	0.00320928			P.II	VI.C Hypothetical/Global similarity	Hypothetical signal peptide protein		Q92MB6
SMc00662		CDS			1.73168	0.00176271	P.III	VI.B Hypothetical/Partial homology	Hypothetical protein		Q92MB8
SMc00663		CDS	1.52798	0.00544021	2.01295	0.000512143	P.I	VI.B Hypothetical/Partial homology	Hypothetical protein		Q92JY8
SMc00677		CDS			1.13264	0.00749637	P.III	I Small Molecule Metabolism	Putative aminotransferase		Q92MD1
SMc00680		CDS	1.53099	0.000512143	1.83927	0.000512143	P.I	I Small Molecule Metabolism	NADP-dependent alcohol dehydrogenase	K13979	Q92MD4
SMc00690	accA	CDS	-1.82392	0.000512143			P.II	I.C Fatty acid biosynthesis	Probable acetyl-coenzyme A carboxylase carboxyl transferase subunit alpha protein	K01962	Q92ME2
SMc00695	aroK	CDS	-1.33135	0.00137247			P.II	I.A.5 chorismate	Putative shikimate kinase I	K00891	Q92ME6
SMc00700		CDS	-1.74021	0.000512143			P.II	I.B.3 cobalamin	Probable aerobic cobaltochelatase	K09882	Q92MF1
SMc00701	cobT	CDS	-1.4007	0.000512143			P.II	I.B.3 cobalamin	Probable Aerobic cobaltochelatase CobT subunit	K09883	Q92MF2
SMc00703		CDS	-2.12936	0.00176271	-2.04889	0.0009592	P.I	VI.C Hypothetical/Global similarity	Hypothetical transmembrane protein	K09125	Q92MF3
SMc00704	rpmB	CDS	-2.49992	0.000512143	-1.09092	0.00805017	P.I	III.C.2 ribosomal proteins - synthesis, modification	Probable 5S ribosomal protein L28	K02902	Q92MF4
SMc00705		CDS	1.51492	0.000512143	1.71011	0.000512143	P.I	VI.C Hypothetical/Global homology	Conserved hypothetical signal peptide protein		Q92MF5
SMc00714	plsC	CDS	-1.18321	0.00176271			P.II	II.B.1 phospholipides	Lysophosphatidic acid acyl transferase	K00655	Q92MG4
SMc00718		CDS	-1.37166	0.000512143			P.II	VI.C Hypothetical/Global homology	Hypothetical transmembrane protein		Q92MG6
SMc00719	hpt	CDS	-1.21053	0.000512143			P.II	I.F.1 salvage of nucleosides and nucleotides	Probable hypoxanthine phosphoribosyltransferase	K00760	Q92MG7
SMc00722		CDS			1.04286	0.00805017	P.III	VI.B Hypothetical/Partial homology	Hypothetical transmembrane protein		Q92JZ5
SMc00723	lysA	CDS	-1.48441	0.000512143			P.II	I.A.13 lysine	Probable diaminopimelate DAP decarboxylase	K01586	Q92MG9
SMc00727	hbdA	CDS	-1.60627	0.00513758			P.II	I.C Fatty acid biosynthesis	Probable 3-hydroxybutyryl-CoA dehydrogenase	K00074	Q92MH3
SMc00737		CDS	1.71014	0.000512143	2.79175	0.000512143	P.I	VI.C Hypothetical/Global homology	Conserved hypothetical protein		Q92MI1
SMc00744		CDS	-1.42365	0.0091608	-1.91552	0.000512143	P.I	IV.D Transport of small molecules	MFS-type transport protein	K18552	Q92MI8
SMc00764		CDS	1.32144	0.00452512			P.II	VI.D Unknown	Hypothetical/unknown transmembrane protein		Q92RX9
SMc00765	mcpZ	CDS	-1.82673	0.00176271	-1.57968	0.000512143	P.I	IV.C Mobility chemotaxis	Probable methyl-accepting chemotaxis protein	K03406	Q92RX8
SMc00767		CDS	5.51676	0.000512143	1.36913	0.00354496	P.I	VI.B Hypothetical/Partial homology	Hypothetical protein		Q92KM8
SMc00768	aceA	CDS	4.78922	0.000512143			P.II	I.F.17 glyoxylate bypass	Probable isocitrate lyase	K01637	Q92RX6
SMc00777		CDS			4.34069	0.000512143	P.III	VI.C Hypothetical/Global homology	Conserved hypothetical protein		Q92RW8
SMc00778		CDS			1.13106	0.00176271	P.III	I Small Molecule Metabolism	Short-chain dehydrogenase/reductase involved in proline utilization		Q92RW7
SMc00779		CDS			0.9818	0.00777209	P.III	I Small Molecule Metabolism	Probable FAD-linked oxidoreductase		Q92RW6
SMc00784	fbpA	CDS	-1.42374	0.000512143	-1.17605	0.00176271	P.I	IV.D.4 cations	Fe3+ ABC transporter	K02012	Q92RW1
SMc00785	rirA	CDS			1.37397	0.000512143	P.III	IV.F Adaptation	Transcriptional regulator of the iron limitation response	K13772	Q9R9M8
SMc00787	dppB1	CDS	-2.84068	0.000512143	-2.43565	0.000512143	P.I	IV.D.2 amino acids, amines, peptides	Oligopeptide ABC transporter,permease component	K12369	Q92RV9
SMc00788	dppC1	CDS	-2.33064	0.000512143	-2.08593	0.000512143	P.I	IV.D.2 amino acids, amines, peptides	Oligopeptide ABC transporter,permease component	K12370	Q92RV8
SMc00789	dppD1	CDS	-2.72838	0.000512143	-1.99271	0.00213505	P.I	IV.D.2 amino acids, amines, peptides	Oligopeptide ABC transporter,ATP-binding component	K12371	Q92RV7
SMc00790	dppF1	CDS	-2.41432	0.000512143	-1.9057	0.000512143	P.I	IV.D.2 amino acids, amines, peptides	Oligopeptide ABC transporter,ATP-binding component	K12372	Q92RV6
SMc00791		CDS	-2.06126	0.000512143			P.II	VI.C Hypothetical/Global homology	Conserved hypothetical protein		Q92RV5
SMc00793		CDS	1.20712	0.00137247			P.II	IV.D Transport of small molecules	Putative permease		Q92RV3
SMc00797		CDS	-1.82275	0.000512143			P.II	I.I.3 amino acids	Probable amino acid dehydrogenase	K00285	Q92RU9
SMc00798		CDS	1.97048	0.000512143			P.II	VI.C Hypothetical/Global homology	Conserved hypothetical protein		Q92RU8
SMc00800		CDS	4.52668	0.000512143	1.32997	0.00661481	P.I	VI.B Hypothetical/Partial homology	Hypothetical transmembrane protein		Q92KM6
SMc00804		CDS	1.47448	0.00137247			P.II	VI.B Hypothetical/Partial homology	Hypothetical protein		Q92KM5
SMc00805		CDS			1.55202	0.00354496	P.III	VI.B Hypothetical/Partial homology	Hypothetical protein		Q92KM4
SMc00808	chrA	CDS	1.90661	0.000512143			P.II	IV.D.1 anions	Putative chromate transport protein	K07240	Q92RU1
SMc00809		CDS	6.93325	0.000512143			P.II	VI.C Hypothetical/Global homology	Putative signal peptide protein		Q92RU0
SMc00814		CDS	4.07248	0.000512143	2.29209	0.000512143	P.I	VI.C Hypothetical/Global homology	Hypothetical signal peptide protein		Q92RT6
SMc00815	guaB	CDS	-1.84088	0.000512143			P.II	I.D.2 purine ribonucleotide biosynthesis	Probable inosine-5'-monophosphate dehydrogenase	K00088	Q92RT5
SMc00816		CDS	-1.36665	0.000512143			P.II	VI.C Hypothetical/Global homology	Conserved hypothetical transmembrane protein		Q92RT4
SMc00817		CDS	2.57377	0.000512143			P.II	I.I.4 carbon compounds	Probable carboxymethylenebutenolidase	K01061	Q92RT3
SMc00819	katA	CDS	5.38989	0.000512143	7.1471	0.000512143	P.I	IV.G.4 detoxification	Catalase	K03781	P95631
SMc00825	gsh1,gshA	CDS	-2.07687	0.000512143	-1.23438	0.000512143	P.I	I.B.6 thioredoxin, glutaredoxin, glutathione	Glutamate-cysteine ligase,GshA	K01919	Q926D5
SMc00826		CDS	-1.70834	0.000512143	-1.23667	0.00250247	P.I	VI.C Hypothetical/Global homology	Conserved hypothetical protein	K09761	Q92RS8
SMc00827	pit2	CDS	-1.19476	0.0009592			P.II	IV.D.1 anions	Probable phosphate permease	K03306	Q92RS7
SMc00830		CDS	-2.43752	0.000512143			P.II	VI.B Hypothetical/Partial homology	Hypothetical transmembrane protein		Q92KM0
SMc00838		CDS	-1.77032	0.000512143	-0.97418	0.00720208	P.I	VI.B Hypothetical/Partial homology	Hypothetical transmembrane protein	K07289	Q92KM7
SMc00850		CDS	-1.15548	0.00354496			P.II	VI.C Hypothetical/Global homology	Conserved hypothetical protein		Q92RL1
SMc00851	glyS	CDS	-2.0034	0.000512143	-1.20395	0.00320928	P.I	II.D.1 amino acyl tRNA synthesis; tRNA modification	Probable glycyl-tRNA synthetase beta chain	K01879	Q92RL2
SMc00852		CDS	-1.06539	0.00452512			P.II	VI.B Hypothetical/Partial homology	Hypothetical transmembrane signal peptide protein		Q92KK6
SMc00855	glyQ	CDS	-2.06002	0.000512143			P.II	II.D.1 amino acyl tRNA synthesis; tRNA modification	Probable glycyl-tRNA synthetase alpha chain	K01878	Q92RL5
SMc00869	atpF2	CDS	-1.78253	0.000512143			P.II	I.E.2 ATP-proton motive force interconversion	Probable ATP synthase subunit B' transmembrane protein	K02109	Q92RM6
SMc00870	atpE	CDS	-2.40765	0.000512143			P.II	I.E.2 ATP-proton motive force interconversion	Probable ATP synthase subunit C transmembrane protein	K02110	Q92RM7
SMc00871	atpB	CDS	-2.44153	0.000512143	-1.60326	0.000512143	P.I	I.E.2 ATP-proton motive force interconversion	Probable ATP synthase A chain transmembrane protein	K02108	Q92RM8
SMc00872	atpI	CDS	-1.93917	0.000512143			P.II	I.E.2 ATP-proton motive force interconversion	Putative FF1 ATP synthase,subunit I transmembrane protein	K02116	Q92RM9
SMc00884	ilvD1	CDS	-1.41093	0.000512143			P.II	I.A.2 isoleucine/valine	Putative dihydroxy-acid dehydratase	K22216	Q92RP0
SMc00885		CDS	6.26202	0.000512143	3.72164	0.000512143	P.I	VI.B Hypothetical/Partial homology	Hypothetical transmembrane signal peptide protein		Q92KL1
SMc00893		CDS	-1.25451	0.00176271			P.II	I Small Molecule Metabolism	Probable phosphoglycolate phosphatase	K01091	Q92RP8
SMc00894	kdtA	CDS	-1.96362	0.000512143	-1.73546	0.000512143	P.I	III.A.1 surface polysaccharides/antigens	Putative 3-deoxy-D-manno-octulosonic-acid transferase	K02527	Q92RP9
SMc00895		CDS	-2.08537	0.000512143			P.II	VI.C Hypothetical/Global homology	Conserved hypothetical protein		Q92RQ0
SMc00896		CDS	-1.27489	0.000512143			P.II	I Small Molecule Metabolism	Inositol monophosphatase family protein	K01092	Q92RQ1
SMc00897	pmbA	CDS	-0.977405	0.00995897			P.II	II.B.7 proteins and peptides - translation and modification	Hypothetical PmbA protein	K03592	Q92RQ2
SMc00902		CDS	-2.14775	0.000512143			P.II	VI.C Hypothetical/Global homology	Conserved hypothetical protein	K08316	Q92RQ7
SMc00904		CDS	-1.71834	0.000512143			P.II	VI.B Hypothetical/Partial homology	Hypothetical protein	K06178	Q92KL3
SMc00907		CDS	-1.19756	0.000512143			P.II	VI.B Hypothetical/Partial homology	Hypothetical transmembrane protein		Q92KL4
SMc00908	ileS	CDS	-2.75661	0.000512143	-1.53091	0.000512143	P.I	II.D.1 amino acyl tRNA synthesis; tRNA modification	Probable isoleucyl-tRNA synthetase	K01870	Q92RR0
SMc00909	ribF	CDS	-2.00298	0.000512143	-1.1049	0.00176271	P.I	I.B.7 riboflavin	Probable riboflavin biosynthesis protein RibF includes: riboflavin kinase and FMN adenylyltransferase	K11753	Q92RR1
SMc00910		CDS	-1.52131	0.000512143	-1.1791	0.00176271	P.I	VI.C Hypothetical/Global homology	Conserved hypothetical protein		Q92RR2
SMc00911		CDS	1.28181	0.000512143	1.70286	0.000512143	P.I	VI.C Hypothetical/Global homology	Conserved hypothetical protein		Q92RR3
SMc00912	groES1	CDS	-4.94803	0.000512143	-3.43878	0.000512143	P.I	IV.B Chaperoning	1 KD chaperonin A	K04078	P35473
SMc00913	groEL1	CDS	-4.15263	0.000512143	-3.72423	0.000512143	P.I	IV.B Chaperoning	6 KD chaperonin A	K04077	P35469
SMc00914		CDS	-1.67544	0.000512143			P.II	I Small Molecule Metabolism	Probable ferredoxin reductase	K00529	Q92RR4
SMc00916	gst11	CDS	-1.22302	0.0009592			P.II	VI MISCELLANEOUS	Putative glutathione S-transferase	K11209	Q92RR5
SMc00918	hisZ	CDS	-1.63085	0.0009592			P.II	I.A.4 histidine	ATP phosphoribosyltransferase regulatory subunit	K02502	Q92KL6
SMc00919	hisS	CDS	-1.76484	0.000512143			P.II	II.D.1 amino acyl tRNA synthesis; tRNA modification	Probable histidyl-tRNA synthetase	K01892	Q92RR7
SMc00921		CDS	2.88885	0.00137247			P.II	VI.B Hypothetical/Partial homology	Hypothetical signal peptide protein		Q92KL7
SMc00922		CDS	1.29721	0.00482954	1.4499	0.00176271	P.I	IV.D Transport of small molecules	Probable cytosine/uracil/thiamine/allantoin permease	K03457	Q92RR9
SMc00924		CDS	-1.29803	0.0009592			P.II	VI.B Hypothetical/Partial homology	Hypothetical protein		Q92KL8
SMc00925		CDS	-2.32918	0.00137247			P.II	VI.C Hypothetical/Global homology	Conserved hypothetical protein,signal peptide		Q92KL9
SMc00931		CDS	2.50256	0.00749637			P.II	VI.C Hypothetical/Global homology	Hypothetical/unknown protein		Q92RR8
SMc00933		CDS	-2.22246	0.000512143			P.II	VI.C Hypothetical/Global homology	Conserved hypothetical protein		Q92RP5
SMc00936	ilvA	CDS	-1.28678	0.00137247			P.II	I.A.2 isoleucine/valine	Probable threonine dehydratase biosynthetic protein	K01754	Q92PU9
SMc00938		CDS	1.56187	0.000512143	1.7731	0.000512143	P.I	VI.C Hypothetical/Global similarity	Hypothetical protein		Q92PU7
SMc00939		CDS			1.10048	0.00137247	P.III	VI.C Hypothetical/Global homology	Conserved hypothetical protein		Q92PU6
SMc00941		CDS	1.45743	0.000512143	1.95294	0.000512143	P.I	VI.C Hypothetical/Global homology	Hypothetical/unknown protein		Q92PU5
SMc00942		CDS			1.50489	0.000512143	P.III	VI.C Hypothetical/Global homology	Conserved hypothetical protein		Q92PU4
SMc00943	wrbA1	CDS	2.08146	0.000512143	2.79172	0.000512143	P.I	VI.C Hypothetical/Global homology	Putative flavoprotein	K03809	Q92PU3
SMc00954	atsA	CDS	1.467	0.000512143	1.51267	0.000512143	P.I	I Small Molecule Metabolism	Arylsulfatase		Q92PT4
SMc00955		CDS			1.51049	0.000512143	P.III	VI.C Hypothetical/Global homology	Conserved hypothetical protein		Q92PT3
SMc00959		CDS	1.39229	0.000512143	1.2893	0.000512143	P.I	VI.C Hypothetical/Global homology	Hypothetical/unknown protein		Q92PT2
SMc00961		CDS	-1.42954	0.000512143	-1.1339	0.00513758	P.I	VI.C Hypothetical/Global homology	Conserved hypothetical protein	K09927	Q92RI0
SMc00962	bioM	CDS	-1.43817	0.00720208			P.II	IV.D Transport of small molecules	Biotin ABC transporter,ATP-binding component	K16784	Q92RI1
SMc00965		CDS	-2.01227	0.000512143			P.II	I.C Fatty acid biosynthesis	Putative acyl-CoA synthase	K01897	Q92RI4
SMc00972	dxs	CDS	-1.16578	0.00213505			P.II	I.F.18 pool of unassigned individual reversibles reactions	Probable 1-deoxyxylulose-5-phosphate synthase	K01662	Q92RJ1
SMc00975	mcpU	CDS	-2.73044	0.00354496	-3.07955	0.000512143	P.I	IV.C Mobility chemotaxis	Probable chemoreceptor (methyl-accepting chemotaxis) transmembrane protein	K03406	Q92RJ4
SMc00978		CDS	1.83603	0.000512143	2.86846	0.000512143	P.I	VI.C Hypothetical/Global similarity	Hypothetical transmembrane protein	K16074	Q92RJ7
SMc00980		CDS			1.67989	0.000512143	P.III	VI.C Hypothetical/Global homology	Glycosyl hydrolase family protein		Q92KK2
SMc00983		CDS	-1.44703	0.000512143	-1.3012	0.000512143	P.I	VI.C Hypothetical/Global similarity	Hypothetical/unknown protein		Q92RK1
SMc00989		CDS	-1.1939	0.00777209			P.II	VI.C Hypothetical/Global homology	Hypothetical signal peptide protein	K07274	Q92RK6
SMc00992		CDS	-1.76082	0.00995897			P.II	VI.A Not classified regulator	Diguanylate cyclase/phosphodiesterase	K20966	Q92KK4
SMc00993	purD	CDS	-2.11613	0.000512143	-1.02781	0.00661481	P.I	I.D.2 purine ribonucleotide biosynthesis	Probable phosphoribosylamine--glycine ligase	K01945	Q92RL0
SMc00995		CDS	-1.76623	0.000512143	-1.23806	0.000512143	P.I	VI.C Hypothetical/Global homology	Conserved hypothetical protein		Q92QC4
SMc00996		CDS	-1.32174	0.000512143			P.II	III.B.3 murein sacculus, peptidoglycan	Putative D-alanyl-D-alanine carboxypeptidase	K01286	Q92KE5
SMc00999		CDS	-1.32972	0.000512143			P.II	VI.C Hypothetical/Global homology	Conserved hypothetical protein		Q92QC0
SMc01000		CDS	-1.41455	0.00720208			P.II	VI.C Hypothetical/Global homology	Conserved hypothetical protein		Q92QB9
SMc01002		CDS	1.4507	0.000512143	1.75853	0.000512143	P.I	VI.C Hypothetical/Global homology	Conserved hypothetical protein		Q92QB7
SMc01006		CDS			1.83026	0.000512143	P.III	VI.C Hypothetical/Global homology	Conserved hypothetical protein		Q92QB3
SMc01010	thrS	CDS	-2.87039	0.000512143	-1.78472	0.00213505	P.I	II.D.1 amino acyl tRNA synthesis; tRNA modification	Probable threonyl-tRNA synthetase	K01868	Q92QB0
SMc01017		CDS	-1.60633	0.000512143	-1.4007	0.00137247	P.I	I Small Molecule Metabolism	Putative acetyltransferase	K03829	Q92QA6
SMc01018	parE	CDS	-1.9735	0.000512143			P.II	II.B.8 DNA - replication, repair, restr./modif.	Probable topoisomerase IV subunit B	K02622	Q92QA5
SMc01021		CDS	3.38799	0.000512143	3.61369	0.000512143	P.I	VI.C Hypothetical/Global homology	Hypothetical transmembrane protein		Q92QA3
SMc01022		CDS			2.12153	0.000512143	P.III	I.G.1 electron transport	Putative cytochrome B transmembrane protein	K12262	Q92QA2
SMc01023	tpiA	CDS	-1.3243	0.000512143			P.II	I.H.8 glycolysis	Triosephosphate isomerase	K01803	Q92QA1
SMc01024		CDS	-1.7804	0.000512143			P.II	VI.B Hypothetical/Partial homology	Hypothetical transmembrane protein	K03075	Q92KD9
SMc01025	pyrG	CDS	-2.07542	0.000512143	-1.00835	0.00944057	P.I	I.D.1 pyrimidine ribonucleotide biosynthesis	Probable CTP synthase	K01937	Q92QA0
SMc01027	kdsA	CDS	-1.49481	0.000512143			P.II	III.A.1 surface polysaccharides/antigens	Probable 2-dehydro-3-deoxyphosphooctonate aldolase	K01627	Q92Q99
SMc01029		CDS	-1.29956	0.000512143			P.II	VI.C Hypothetical/Global homology	Conserved hypothetical protein		Q92Q97
SMc01030	pdhA	CDS	-3.05086	0.000512143			P.II	I.H.7 pyruvate dehydrogenase	Pyruvate dehydrogenase E1 component alpha subunit	K00161	Q9R9N5
SMc01031	pdhB	CDS	-2.14908	0.000512143			P.II	I.H.7 pyruvate dehydrogenase	Pyruvate dehydrogenase E1 component beta subunit	K00162	Q9R9N4
SMc01032	pdhC	CDS	-2.00039	0.000512143			P.II	I.H.7 pyruvate dehydrogenase	Dihydrolipoyllysine-residue acetyltransferase component of pyruvate dehydrogenase complex	K00627	Q9R9N3
SMc01033		CDS	-1.41284	0.0009592			P.II	I.I.4 carbon compounds	Esterase		Q7APD5
SMc01046	trkA	CDS	-1.58689	0.000512143	-0.965581	0.00995897	P.I	IV.D.4 Cations	Probable TRK system potassium uptake protein	K03499	Q92Q86
SMc01049	hflX	CDS	-1.5281	0.000512143			P.II	VI.A Not classified regulator	Putative GTP-binding protein	K03665	Q92Q83
SMc01053	cysG	CDS			-1.47829	0.000512143	P.III	I.B.4 heme, porphyrin	Probable siroheme synthase	K02302	Q92Q80
SMc01089		CDS	-1.57044	0.000512143			P.II	VI.B Hypothetical/Partial homology	Hypothetical transmembrane protein		Q92KR2
SMc01090	deaD	CDS	-2.19307	0.000512143			P.II	II.B.6 RNA synthesis, modification , DNA transcription	Putative ATP-dependent RNA helicase	K05592	Q92SG6
SMc01096	dapE	CDS	-1.63092	0.000512143			P.II	I.A.13 lysine	Probable succinyl-diaminopimelate desuccinylase	K01439	Q92SH1
SMc01100	fmt	CDS	-1.64068	0.000512143			P.II	II.D.1 amino acyl tRNA synthesis; tRNA modification	Probable methionyl-tRNA formyltransferase	K00604	Q92SH5
SMc01101	def1	CDS	-2.53167	0.000512143	-1.15162	0.00137247	P.I	II.B.7 proteins and peptides - translation and modification	Probable peptide deformylase	K01462	Q92SH6
SMc01104	mcpX	CDS			-1.63726	0.00720208	P.III	IV.C Mobility chemotaxis	Probable chemoreceptor (methyl-accepting chemotaxis) transmembrane protein	K03406	Q92SH9
SMc01109	metK	CDS	-2.51586	0.000512143	-1.92401	0.000512143	P.I	I.F.14 amino acids	Probable S-adenosylmethionine synthetase	K00789	Q92SI4
SMc01112	tlyC	CDS	-2.50093	0.000512143			P.II	VI.C Hypothetical/Global homology	CBS domain-containing protein		Q92KR5
SMc01113		CDS			1.08714	0.0009592	P.III	VI.C Hypothetical/Global homology	Conserved hypothetical protein	K07042	Q92SI5
SMc01114	phoH	CDS			1.5702	0.00176271	P.III	IV.F Adaptation	Putative phosphate starvation-inducible protein PhoH,predicted ATPase	K06217	Q92SI6
SMc01116	olsA	CDS	-1.90981	0.000512143			P.II	II.B.1 phospholipids	Acyltransferase	K22617	Q7APG1
SMc01118		CDS			1.67953	0.000512143	P.III	II.A.4 degradation of proteins, peptides, glycopeptides	Putative peptidase	K14742	Q7APG3
SMc01120		CDS	-1.04003	0.00720208			P.II	VI.B Hypothetical/Partial homology	Hypothetical protein		Q92KR6
SMc01121	trpS	CDS	-3.05582	0.000512143	-1.9635	0.000512143	P.I	II.D.1 amino acyl tRNA synthesis; tRNA modification	Probable tryptophanyl-tRNA synthetase	K01867	Q92SI9
SMc01124	glnD	CDS	-1.26376	0.0069235			P.II	I.A.18 glutamine	Protein-PII uridylyltransferase	K00990	P56884
SMc01125	mutS	CDS	-1.21431	0.000512143			P.II	II.B.8 DNA - replication, repair, restr./modif.	Probable DNA mismatch repair protein	K03555	P56883
SMc01127	olsB	CDS			6.6938	0.000512143	P.III	I.C Fatty acid biosynthesis	Protein required for first step of ornithine-containing lipid biosynthesis (N-acylation of ornithine forming lyso-ornithine lipid)	K22310	Q92SJ1
SMc01128		CDS	-1.21162	0.00213505			P.II	VI.A Not classified regulator	Putative sensor histidine kinase transmembrane protein		Q92SJ2
SMc01134	ihfB	CDS			1.34628	0.000512143	P.III	II.B.8 DNA - replication, repair, restr./modif.	Probable integration host factor beta-subunit	K05788	Q92SJ7
SMc01140		CDS	1.58503	0.000512143	1.67764	0.000512143	P.I	I.E.1 global regulatory functions	Probable sigma54 modulation protein	K05808	P17265
SMc01144	rph	CDS	-1.06079	0.00420562			P.II	II.A.2 degradation of RNA	Probable ribonuclease PH protein	K00989	Q92SK2
SMc01145		CDS	-1.68932	0.000512143			P.II	VI.C Hypothetical/Global homology	Putative glyoxalase family protein		Q92SK3
SMc01146		CDS	-2.57001	0.000512143	-1.10506	0.00285916	P.I	I.F.1 salvage of nucleosides and nucleotides	Nucleoside-triphosphatase	K02428	Q92SK4
SMc01147		CDS	-2.40102	0.000512143			P.II	I.B.4 heme, porphyrin	Putative oxygen-independent coproporphyrinogen III oxidase		Q92SK5
SMc01152	rpsT	CDS	-2.16667	0.000512143			P.II	III.C.2 ribosomal proteins - synthesis, modification	3S ribosomal protein S2	K02968	P48948
SMc01155	ubiE	CDS	-1.76269	0.00137247			P.II	I.B.5 menaquinone, ubiquinone	Probable ubiquinone/menaquinone biosynthesis methyltransferase	K03183	Q92SK7
SMc01156	aarF	CDS	-1.00608	0.00777209			P.II	I.B.5 menaquinone, ubiquinone	Probable ubiquinone biosynthesis protein	K03688	Q92SK8
SMc01159		CDS	-1.77507	0.000512143			P.II	I Small Molecule Metabolism	Putative FAD-dependent pyridine nucleotide-disulphide oxidoreductase		Q92SL1
SMc01169	ald	CDS	-2.40136	0.000512143	-2.85406	0.000512143	P.I	I.H Energy metabolism, carbon	Probable alanine dehydrogenase oxidoreductase	K00259	Q92PV2
SMc01172	sseA	CDS			1.93307	0.000512143	P.III	I.F.3 sulfur metabolism	Putative 3-mercaptopyruvate sulfurtransferase	K01011	Q92PV4
SMc01173	alaS2	CDS			1.76279	0.000512143	P.III	II.D.1 amino acyl tRNA synthesis; tRNA modification	Probable alanyl-tRNA synthetase	K07050	Q92KC7
SMc01174	cysK2	CDS			1.25084	0.00137247	P.III	I.A.9 cysteine	Probable cysteine synthase A (O-acetylserine sulfhydrylase A) protein	K01738	Q92PV5
SMc01175		CDS	3.62305	0.000512143			P.II	I Small Molecule Metabolism	Probable oxidoreductase		Q92PV6
SMc01179		CDS			-1.91372	0.00176271	P.III	IV.G Protection responses	Putative multidrug export protein	K11743	Q92PW0
SMc01183	lexA	CDS	-1.35245	0.000512143			P.II	II.B.8 DNA - replication, repair, restr./modif.	Putative LexA repressor transcription regulator	K01356	Q92PW3
SMc01184		CDS	1.7889	0.000512143	1.608	0.000512143	P.I	VI.C Hypothetical/Global similarity	Hypothetical transmembrane protein		Q92PW4
SMc01193		CDS	-1.22106	0.00176271			P.II	VI.C Hypothetical/Global homology	Conserved hypothetical protein	K03424	Q92PX1
SMc01194		CDS	-1.76616	0.000512143			P.II	VI.C Hypothetical/Global homology	Conserved hypothetical protein	K06167	Q92PX2
SMc01197		CDS	1.31478	0.00213505			P.II	VI.B Hypothetical/Partial homology	Hypothetical protein		Q92KC9
SMc01206	tgt	CDS	-1.54398	0.000512143	-1.33856	0.000512143	P.I	II.D.1 amino acyl tRNA synthesis; tRNA modification	Probable queuine tRNA-ribosyltransferase (tRNA-guanine transglycosylase)	K00773	Q92PY4
SMc01207	queA	CDS	-1.66115	0.000512143			P.II	II.D.1 amino acyl tRNA synthesis; tRNA modification	Probable S-adenosylmethionine:tRNA ribosyltransferase-isomerase(queuosine biosynthesis protein QueA)	K07568	Q92PY5
SMc01209	coaD	CDS	-1.31588	0.000512143			P.II	I.B Biosynthesis of cofactors, carriers	Probable phosphopantetheine adenylyltransferase	K00954	Q92PY8
SMc01214		CDS			1.52232	0.000512143	P.III	I Small Molecule Metabolism	Putative zinc-binding dehydrogenase		Q92PZ3
SMc01215	carB	CDS	-2.12826	0.000512143	-1.63565	0.000512143	P.I	I.D.1 pyrimidine ribonucleotide biosynthesis	Probable carbamoyl-phosphate synthase large chain (ammonia chain arginine biosynthesis) protein	K01955	Q92PZ4
SMc01216		CDS	3.64414	0.000512143			P.II	VI.C Hypothetical/Global homology	Conserved hypothetical protein		Q92KD0
SMc01217		CDS	2.33292	0.000512143			P.II	IV.D Transport of small molecules	MFS-type transport protein		Q92PZ5
SMc01219	lpsB	CDS	-1.90479	0.000512143	-1.16398	0.00250247	P.I	III.A.1 surface polysaccharides/antigens	Lipopolysaccharide core biosynthesis mannosyltransferase	K12989	Q9R9N2
SMc01220	lpsE	CDS	-1.6006	0.00387636			P.II	III.A.1 surface polysaccharides/antigens	lipopolysaccharide core biosynthesis glycosyl transferase		Q9R9N1
SMc01221	lpsD	CDS	-2.04439	0.000512143			P.II	III.A.1 surface polysaccharides/antigens	Lipopolysaccharide core biosynthesis glycosyl transferase		Q9R9N0
SMc01222	lpsC	CDS	-1.39438	0.00320928			P.II	III.A.1 surface polysaccharides/antigens	Lipopolysaccharide core biosynthesis glycosyl transferase		Q9R9M9
SMc01224	trxB	CDS	-2.02287	0.000512143			P.II	I.F.2 2-prime-deoxyribonucleotide metabolism	Probable thioredoxin reductase	K00384	Q92PZ6
SMc01225	lsrB	CDS	1.50294	0.0009592			P.II	VI.A Not classified regulator	Transcription regulator LysR family		Q92PZ7
SMc01228	str	CDS	-1.15614	0.00602255			P.II	IV.G.2 drug/analog sensitivity and resistance	Streptomycin 6-kinase	K04343	Q92Q00
SMc01230		CDS			1.52389	0.00250247	P.III	VI.B Hypothetical/Partial homology	Putative transglycosylase transmembrane protein		Q92KD1
SMc01231	gyrA	CDS	-2.22605	0.000512143	-1.18684	0.00387636	P.I	II.B.8 DNA - replication, repair, restr./modif.	Probable DNA gyrase subunit A	K02469	Q92Q02
SMc01235	uvrA	CDS	-1.80316	0.000512143			P.II	II.B.8 DNA - replication, repair, restr./modif.	Probable excinuclease ABC subunit A (DNA repair ATP-binding) protein	K03701	P56899
SMc01236		CDS	-1.25878	0.000512143			P.II	VI.C Hypothetical/Global homology	Conserved hypothetical protein		Q92Q04
SMc01242		CDS	-4.39646	0.000512143	-1.74083	0.000512143	P.I	VI.C Hypothetical/Global homology	Conserved hypothetical signal peptide protein	K09796	Q92KD3
SMc01261		CDS	-1.27882	0.00137247			P.II	IV.D Transport of small molecules	Putative transporter transmembrane protein	K06213	Q92QC9
SMc01265		CDS	2.88786	0.000512143	3.03995	0.000512143	P.I	VI.C Hypothetical/Global homology	Conserved hypothetical protein	K06415	Q92QD2
SMc01266		CDS	3.62929	0.000512143	3.21332	0.000512143	P.I	VI.C Hypothetical/Global homology	Conserved hypothetical protein	K09786	Q92QD3
SMc01267		CDS	2.53605	0.000512143	2.68071	0.000512143	P.I	VI.C Hypothetical/Global homology	Conserved hypothetical protein	K07180	Q92QD4
SMc01269		CDS	2.04264	0.000512143	2.13666	0.000512143	P.I	VI.A Not classified regulator	Transcription regulator		Q92QD6
SMc01273		CDS	-1.31623	0.00285916			P.II	I.I.4 carbon compounds	Putative S-formylglutathione hydrolase	K01070	Q92QE0
SMc01281		CDS	2.27338	0.000512143			P.II	VI.C Hypothetical/Global homology	Conserved hypothetical protein	K07147	Q92QE7
SMc01283	rplQ	CDS	-2.1082	0.000512143			P.II	III.C.2 ribosomal proteins - synthesis, modification	Probable 5S ribosomal protein L17	K02879	Q926A5
SMc01285	rpoA	CDS	-2.74442	0.000512143	-1.7609	0.000512143	P.I	II.B.6 RNA synthesis, modification , DNA transcription	DNA-directed RNA polymerase,alpha subunit	K03040	Q925Z2
SMc01286	rpsK	CDS	-2.49522	0.000512143	-1.15037	0.00720208	P.I	III.C.2 ribosomal proteins - synthesis, modification	Probable 3S ribosomal protein S11	K02948	Q925W7
SMc01287	rp	CDS	-2.76879	0.000512143			P.II	III.C.2 ribosomal proteins - synthesis, modification	Probable 3S ribosomal protein S13	K02952	Q925X7
SMc01289	secY	CDS	-2.39483	0.000512143	-2.20425	0.000512143	P.I	IV.E.2 protein, peptide secretion	Preprotein translocase subunit SecY	K03076	Q92QF0
SMc01290	rplO	CDS	-3.30505	0.000512143	-2.48089	0.000512143	P.I	III.C.2 ribosomal proteins - synthesis, modification	Probable 5S ribosomal protein L15	K02876	Q92QF1
SMc01291	rpmD	CDS	-2.96856	0.000512143	-2.36729	0.000512143	P.I	III.C.2 ribosomal proteins - synthesis, modification	Probable 5S ribosomal protein L3	K02907	Q92QF2
SMc01292	rpsE	CDS	-3.65552	0.000512143	-2.23527	0.000512143	P.I	III.C.2 ribosomal proteins - synthesis, modification	Probable 3S ribosomal protein S5	K02988	Q92QF3
SMc01293	rplR	CDS	-2.94968	0.000512143	-1.55945	0.000512143	P.I	III.C.2 ribosomal proteins - synthesis, modification	Probable 5S ribosomal protein L18	K02881	Q92QF4
SMc01294	rplF	CDS	-3.28848	0.000512143	-2.27604	0.000512143	P.I	III.C.2 ribosomal proteins - synthesis, modification	Probable 5S ribosomal protein L6	K02933	Q92QF5
SMc01295	rpsH	CDS	-2.79447	0.000512143	-2.23131	0.000512143	P.I	III.C.2 ribosomal proteins - synthesis, modification	Probable 3S ribosomal protein S8	K02994	Q92QF6
SMc01296	rpsN	CDS	-3.52658	0.000512143	-1.93833	0.000512143	P.I	III.C.2 ribosomal proteins - synthesis, modification	Probable 3S ribosomal protein S14	K02954	Q92QF7
SMc01297	rplE	CDS	-3.22419	0.000512143	-2.13347	0.0009592	P.I	III.C.2 ribosomal proteins - synthesis, modification	Probable 5S ribosomal protein L5	K02931	Q92QF8
SMc01298	rplX	CDS	-3.14806	0.000512143			P.II	III.C.2 ribosomal proteins - synthesis, modification	Probable 5S ribosomal protein L24	K02895	Q92QF9
SMc01299	rplN	CDS	-2.87501	0.000512143	-1.62851	0.000512143	P.I	III.C.2 ribosomal proteins - synthesis, modification	Probable 5S ribosomal protein L14	K02874	Q92QG0
SMc01300	rpsQ	CDS	-3.71348	0.000512143	-2.55474	0.000512143	P.I	III.C.2 ribosomal proteins - synthesis, modification	Probable 3S ribosomal protein S17	K02961	Q92QG1
SMc01301	rpmC	CDS	-3.4533	0.000512143	-2.55923	0.000512143	P.I	III.C.2 ribosomal proteins - synthesis, modification	Probable 5S ribosomal protein L29	K02904	Q92QG2
SMc01302	rplP	CDS	-3.74134	0.000512143	-2.86045	0.000512143	P.I	III.C.2 ribosomal proteins - synthesis, modification	Probable 5S ribosomal protein L16	K02878	Q92QG3
SMc01303	rpsC	CDS	-3.88939	0.000512143	-3.12772	0.000512143	P.I	III.C.2 ribosomal proteins - synthesis, modification	Probable 3S ribosomal protein S3	K02982	Q92QG4
SMc01304	rplV	CDS	-3.55716	0.000512143	-2.95658	0.00137247	P.I	III.C.2 ribosomal proteins - synthesis, modification	Probable 5S ribosomal protein L22	K02890	Q92QG5
SMc01305	rpsS	CDS	-3.93756	0.000512143	-3.40882	0.000512143	P.I	III.C.2 ribosomal proteins - synthesis, modification	Probable 3S ribosomal protein S19	K02965	P66488
SMc01306	rplB	CDS	-4.55391	0.000512143	-3.40883	0.000512143	P.I	III.C.2 ribosomal proteins - synthesis, modification	Probable 5S ribosomal protein L2	K02886	Q92QG7
SMc01307	rplW	CDS	-4.28015	0.000512143	-3.72861	0.000512143	P.I	III.C.2 ribosomal proteins - synthesis, modification	Probable 5S ribosomal protein L23	K02892	Q92QG8
SMc01308	rplD	CDS	-4.31095	0.000512143	-3.26516	0.000512143	P.I	III.C.2 ribosomal proteins - synthesis, modification	Probable 5S ribosomal protein L4	K02926	Q92QG9
SMc01309	rplC	CDS	-4.17889	0.000512143	-3.47412	0.000512143	P.I	III.C.2 ribosomal proteins - synthesis, modification	Probable 5S ribosomal protein L3	K02906	Q92QH0
SMc01310	rpsJ	CDS	-3.60511	0.000512143	-3.01665	0.000512143	P.I	III.C.2 ribosomal proteins - synthesis, modification	Probable 3S ribosomal protein S1	K02946	Q92QH1
SMc01311	tufA	CDS	-3.4282	0.000512143	-2.97901	0.000512143	P.I	II.B.7 proteins and peptides - translation and modification	Probable elongation factor TU protein	K02358
SMc01312	fusA1	CDS	-3.97956	0.000512143	-2.99288	0.000512143	P.I	II.B.7 proteins and peptides - translation and modification	Probable elongation factor G	K02355	Q92QH2
SMc01313	rpsG	CDS	-3.5754	0.000512143	-2.64462	0.000512143	P.I	III.C.2 ribosomal proteins - synthesis, modification	Probable 3S ribosomal protein S7	K02992	Q92QH3
SMc01314	rpsL	CDS	-3.37138	0.000512143	-1.81345	0.000512143	P.I	III.C.2 ribosomal proteins - synthesis, modification	Probable 3S ribosomal protein S12	K02950	Q92QH4
SMc01316	rpoC	CDS	-1.67718	0.00176271			P.II	II.B.6 RNA synthesis, modification, DNA transcription	Probable DNA-directed RNA polymerase beta' chain	K03046	Q92QH6
SMc01317	rpoB	CDS	-2.31351	0.000512143	-1.8074	0.0009592	P.I	II.B.6 RNA synthesis, modification , DNA transcription	Probable DNA-directed RNA polymerase beta chain	K03043	Q92QH7
SMc01318	rplL	CDS	-4.17212	0.000512143	-3.71098	0.000512143	P.I	III.C.2 ribosomal proteins - synthesis, modification	Probable 5S ribosomal protein L7/L12 (L8)	K02935	Q92QH8
SMc01319	rplJ	CDS	-4.52011	0.000512143	-3.70639	0.000512143	P.I	III.C.2 ribosomal proteins - synthesis, modification	Probable 5S ribosomal protein L1 (L8)	K02864	Q92QH9
SMc01320	rplA	CDS	-4.0967	0.000512143	-2.92581	0.000512143	P.I	III.C.2 ribosomal proteins - synthesis, modification	Probable 5S ribosomal protein L1	K02863	Q92QI0
SMc01321	rplK	CDS	-3.83373	0.000512143	-2.66981	0.000512143	P.I	III.C.2 ribosomal proteins - synthesis, modification	Probable 5S ribosomal protein L11	K02867	Q92QI1
SMc01322	nusG	CDS	-1.97069	0.000512143			P.II	II.B.6 RNA synthesis, modification , DNA transcription	Probable transcription antitermination protein	K02601	Q92QI2
SMc01323	secE	CDS	-1.88297	0.000512143			P.II	IV.E.2 protein, peptide secretion	Putative preprotein translocase SecE subunit transmembrane	K03073	Q92QI3
SMc01324		CDS			1.86552	0.000512143	P.III	I Small Molecule Metabolism	Sugar epimerase		Q92QI4
SMc01326	tufB	CDS	-3.12246	0.000512143	-1.90784	0.000512143	P.I	II.B.7 proteins and peptides - translation and modification	Probable elongation factor TU protein	K02358
SMc01327		CDS	-2.1734	0.000512143			P.II	II.B.6 RNA synthesis, modification , DNA transcription	Putative tRNA/rRNA methyltransferase	K03218	Q92QI6
SMc01329	azoR	CDS	-1.62336	0.00482954			P.II	I Small Molecule Metabolism	Probable FMN-dependent NADH-azoreductase	K01118	Q92QI7
SMc01331	ppnK	CDS	-1.28336	0.00213505			P.II	I Small Molecule Metabolism	Probable inorganic polyphosphate/ATP-NAD kinase	K00858	Q92QJ0
SMc01336	rne	CDS	-2.23391	0.000512143	-1.46485	0.000512143	P.I	II.A.2 degradation of RNA	Probable ribonuclease E	K08300	Q92QJ4
SMc01343	aroQ	CDS	-1.04061	0.0069235			P.II	I.A.5 chorismate	Putative 3-dehydroquinate dehydratase	K03786	Q92QJ9
SMc01344	accB	CDS	-1.24738	0.00213505			P.II	I.C Fatty acid biosynthesis	Probable biotin carboxyl carrier protein of acetyl-CoA carboxylase (bccp)	K02160	Q92QK0
SMc01345	accC	CDS	-1.3192	0.0009592			P.II	I.C Fatty acid biosynthesis	Probable biotin carboxylase	K01961	Q92QK1
SMc01350	gatB	CDS	-1.68652	0.000512143			P.II	II.D.1 amino acyl tRNA synthesis; tRNA modification	Putative glutamyl-tRNA amidotransferase subunit B	K02434	Q92QK5
SMc01352	gatA	CDS	-2.03641	0.000512143			P.II	II.D.1 amino acyl tRNA synthesis; tRNA modification	Putative glutamyl-tRNA amidotransferase subunit A	K02433	Q92QK7
SMc01353	gatC	CDS	-1.28732	0.00573901			P.II	II.D.1 amino acyl tRNA synthesis; tRNA modification	Putative glutamyl-tRNA(GLN) amidotransferase subunit C	K02435	Q92QK8
SMc01359	aidB	CDS	-1.67722	0.000512143			P.II	I Small Molecule Metabolism	Putative acyl-CoA dehydrogenase	K09456	Q92QL4
SMc01360	pyrB	CDS	-2.17543	0.00420562			P.II	I.D.1 pyrimidine ribonucleotide biosynthesis	Probable aspartate carbamoyltransferase catalytic chain	K00609	Q92QL5
SMc01364	topA	CDS	-1.94704	0.000512143			P.II	II.B.8 DNA - replication, repair, restr./modif.	Putative DNA topoisomerase I	K03168	Q92QL9
SMc01365	rnr	CDS	-1.28263	0.00137247			P.II	II.A.2 degradation of RNA	Putative exoribonuclease II	K12573	Q92QM0
SMc01366		CDS	-2.45387	0.000512143			P.II	VI.C Hypothetical/Global homology	Conserved hypothetical protein		Q92QM1
SMc01369	rpmG	CDS	-1.45354	0.000512143			P.II	III.C.2 ribosomal proteins - synthesis, modification	Probable 5S ribosomal protein L33	K02913	Q92QM4
SMc01370	pleD	CDS	-2.39232	0.000512143	-1.3621	0.000512143	P.I	VI.A Not classified regulator	Response regulator containing a CheY-like receiver domain and a GGDEF domain	K02488	Q92QM5
SMc01371	divK	CDS	-1.27756	0.00944057			P.II	VI.A Not classified regulator	DivK cell division response regulator,essential cell cycle regulator	K11443	Q92QM6
SMc01378			-3.05227	0.00250247	-1.87347	0.00213505	P.I	tRNA		K14236
SMc01379			-2.94699	0.000512143	-1.62893	0.000512143	P.I	tRNA		K14225
SMc01406		CDS	-1.28723	0.0009592			P.II	VI.A Not classified regulator	Transcription regulator GntR family		Q92NT7
SMc01409		CDS	1.08105	0.00482954			P.II	VI.B Hypothetical/Partial homology	Hypothetical protein		Q92K53
SMc01414		CDS	-1.15367	0.00137247			P.II	II.B.8 DNA - replication, repair, restr./modif.	Putative exodeoxyribonuclease V		Q92K51
SMc01430	ilvH	CDS	-1.6737	0.000512143	-1.37464	0.00602255	P.I	I.A.2 isoleucine/valine	Probable acetolactate synthase isozyme III small subunit	K01653	Q92NR6
SMc01431	ilvI	CDS	-1.92604	0.000512143	-1.77424	0.000512143	P.I	I.A.2 isoleucine/valine	Probable acetolactate synthase isozyme III large subunit	K01652	Q92NR5
SMc01439		CDS	-1.23462	0.0009592			P.II	VI.C Hypothetical/Global homology	Conserved hypothetical protein	K09707	Q92K47
SMc01444	thyA	CDS	-1.17726	0.000512143			P.II	I.F.2 2-prime-deoxyribonucleotide metabolism	Probable thymidylate synthase	K00560	Q92NQ5
SMc01448		CDS			1.60231	0.00832418	P.III	VI.C Hypothetical/Global homology	Conserved hypothetical protein		Q92NQ2
SMc01449		CDS	1.53178	0.000512143	2.73028	0.000512143	P.I	VI.C Hypothetical/Global homology	Conserved hypothetical protein		Q92NQ1
SMc01459		CDS	1.75708	0.000512143	2.29638	0.000512143	P.I	VI.C Hypothetical/Global homology	Hypothetical transmembrane protein		Q92NP5
SMc01460		CDS	1.91303	0.000512143	1.83957	0.00137247	P.I	VI.C Hypothetical/Global homology	Conserved hypothetical protein		Q92K42
SMc01461	uvrD1	CDS	-1.56866	0.000512143			P.II	II.B.8 DNA - replication, repair, restr./modif.	Probable DNA helicase II	K03657	Q92NP4
SMc01465	creA	CDS	2.16199	0.000512143			P.II	VI.C Hypothetical/Global similarity	Putative CreA protein	K05805	Q92NP0
SMc01467		CDS	3.6572	0.000512143			P.II	VI.C Hypothetical/Global homology	Conserved hypothetical protein,signal peptide		Q92K41
SMc01468	cheW2	CDS	-2.7674	0.00250247	-2.16054	0.00137247	P.I	V.C Mobility chemotaxis	Probable chemotaxis protein	K03408	G3XCP5
SMc01469	mcpW	CDS	-2.34365	0.000512143	-2.14463	0.000512143	P.I	V.C Mobility chemotaxis	Probable methyl accepting chemotaxis transmembrane protein	K03406	Q92NN8
SMc01471	senC	CDS	-1.42434	0.000512143			P.II	I.H.3 aerobic respiration	Putative electron transport protein SCO1/SenC,cytochrome C oxidase assembly factor	K07152	Q92NN6
SMc01472	prmA	CDS	-1.6972	0.000512143			P.II	III.C.2 ribosomal proteins - synthesis, modification	Putative ribosomal protein L11 methyltransferase	K02687	Q92NN5
SMc01488		CDS	-3.39836	0.000512143			P.II	VI.C Hypothetical/Global homology	Hypothetical transmembrane protein		Q92NT8
SMc01491	cyaI1	CDS			1.29804	0.00250247	P.III	I.E.1 global regulatory functions	Adenylate/guanylate cyclase		Q52999
SMc01492	suhR	CDS	-1.38971	0.000512143			P.II	VI MISCELLANEOUS	RpoH suppressor		P15715
SMc01497		CDS	-2.08594	0.000512143	-1.06827	0.00995897	P.I	IV.D.3 carbohydrates, organic acids, alcohols	Putative C6 polyol ABC transporter,permease component	K10228	Q92N03
SMc01498		CDS	-1.70665	0.000512143			P.II	IV.D.3 carbohydrates, organic acids, alcohols	Putative C6 polyol ABC transporter,permease component	K10229	Q92N04
SMc01499	smoK	CDS	-1.61109	0.0091608			P.II	IV.D.3 carbohydrates, organic acids, alcohols	Putative C6 polyol ABC transporter,ATP-binding component	K10111	Q92N05
SMc01501	mtlK	CDS	-2.17495	0.000512143			P.II	I.I.4 carbon compounds	Probable mannitol 2-dehydrogenase	K00045	Q92N07
SMc01503		CDS	-1.62499	0.000512143			P.II	I.I.4 carbon compounds	Carbohydrate kinase	K00853	Q92N09
SMc01504	rsiB1	CDS	2.00501	0.000512143	1.41433	0.000512143	P.I	II.B.6 RNA synthesis, modification , DNA transcription	Anti-anti-sigma factor		Q92N10
SMc01505	rsiA1	CDS	2.16831	0.00452512			P.II	II.B.6 RNA synthesis, modification , DNA transcription	Anti-sigma factor		Q92K05
SMc01506	rpoE2	CDS	1.99524	0.000512143	1.37576	0.0009592	P.I	II.B.6 RNA synthesis, modification , DNA transcription	RNA polymerase sigma-E factor (Sigma-24).	K03088	Q92N11
SMc01509		CDS	3.8495	0.000512143			P.II	VI.C Hypothetical/Global homology	Hypothetical transmembrane protein		Q92N12
SMc01511	hmuU	CDS			-2.06833	0.0009592	P.III	IV.D Transport of small molecules	Putative hemin transport system permease transmembrane protein	K25133	Q92N14
SMc01512	hmuT	CDS			-2.74611	0.000512143	P.III	IV.D Transport of small molecules	Putative hemin binding periplasmic transmembrane protein	K25132	Q92N15
SMc01513	hmuS	CDS			-3.63616	0.000512143	P.III	IV.D Transport of small molecules	Putative hemin transport protein	K07225	Q92N16
SMc01515		CDS			-2.92715	0.000512143	P.III	VI.C Hypothetical/Global homology	Hypothetical protein signal peptide	K03832	Q92N18
SMc01517		CDS			-3.71609	0.00452512	P.III	VI.C Hypothetical/Global homology	Conserved hypothetical protein		Q92N20
SMc01520		CDS	-2.44941	0.000512143			P.II	VI.C Hypothetical/Global homology	Conserved hypothetical protein	K06886	Q7APC3
SMc01522		CDS	-1.6275	0.000512143			P.II	VI.A Not classified regulator	Hypothetical protein		Q92N23
SMc01531	kdgK	CDS	-1.92659	0.000512143			P.II	I.I.4 carbon compounds	Putative 2-dehydro-3-deoxygluconokinase	K00874	Q92N31
SMc01534		CDS	1.29319	0.00354496	1.78228	0.000512143	P.I	I.F.14 amino acids	Omega-amino acid--pyruvate aminotransferase	K00822	Q92N34
SMc01535		CDS	1.86536	0.000512143	2.53847	0.000512143	P.I	VI.B Hypothetical/Partial homology	Hypothetical protein		Q92K10
SMc01543		CDS	1.64313	0.00995897	1.67688	0.00213505	P.I	VI.C Hypothetical/Global homology	Conserved hypothetical protein		Q92NC2
SMc01545		CDS	-1.20492	0.00250247			P.II	VI.B Hypothetical/Partial homology	Hypothetical protein		Q92K29
SMc01548		CDS			1.80203	0.000512143	P.III	VI.C Hypothetical/Global homology	Conserved hypothetical protein		Q92NB3
SMc01549		CDS	2.23804	0.000512143	1.69009	0.000512143	P.I	VI.C Hypothetical/Global similarity	Hypothetical protein peptide signal		Q92K28
SMc01551		CDS			2.24739	0.000512143	P.III	I Small Molecule Metabolism	Putative membrane bound O-acyl transferase	K19294	Q92NB0
SMc01554		CDS	1.58321	0.000512143	1.02933	0.00513758	P.I	VI.C Hypothetical/Global homology	Conserved hypothetical protein		Q92K26
SMc01557		CDS	5.13947	0.000512143			P.II	VI.C Hypothetical/Global homology	Hypothetical signal peptide protein		Q92NA5
SMc01560		CDS	1.21385	0.00513758			P.II	VI.C Hypothetical/Global homology	Conserved hypothetical protein		Q92NA2
SMc01563	rpoD,sigA	CDS	-1.37629	0.00250247			P.II	II.B.6 RNA synthesis, modification , DNA transcription	RNA polymerase sigma factor transcription regulation protein	K03086	Q59753
SMc01568		CDS	-1.04289	0.00632638			P.II	VI.C Hypothetical/Global homology	Conserved hypothetical protein	K09117	Q92N96
SMc01573		CDS	-1.47949	0.000512143			P.II	VI.C Hypothetical/Global homology	Conserved hypothetical protein		Q92NJ4
SMc01582		CDS			1.46156	0.00889017	P.III	I Small Molecule Metabolism	Putative alcohol dehydrogenase		Q92NJ1
SMc01583		CDS	3.98682	0.000512143	1.20143	0.00213505	P.I	VI.C Hypothetical/Global homology	Conserved hypothetical protein	K21430	Q92N88
SMc01585	cspA3	CDS			2.32969	0.000512143	P.III	IV.F.1 adaptations, atypical conditions	Putative cold shock transcription regulator	K03704	Q92N86
SMc01586		CDS	2.54939	0.000512143			P.II	VI.B Hypothetical/Partial homology	Hypothetical transmembrane protein		Q92K25
SMc01590		CDS	2.60024	0.000512143			P.II	VI.B Hypothetical/Partial homology	Hypothetical protein		Q92K24
SMc01591		CDS	1.16215	0.00513758	2.60776	0.000512143	P.I	VI.C Hypothetical/Global homology	Hypothetical transmembrane protein		Q92N83
SMc01594		CDS			2.11936	0.000512143	P.III	I.A.18 glutamine	Putative glutamine synthetase	K01915	Q92NI9
SMc01597		CDS	1.8542	0.000512143	2.13437	0.000512143	P.I	IV.D.2 amino acids, amines, peptides	Putative amino-acid permease		Q92NI8
SMc01600		CDS			3.27432	0.000512143	P.III	VI.C Hypothetical/Global homology	Conserved hypothetical protein		Q92NI7
SMc01602		CDS			-1.26906	0.00137247	P.III	VI.C Hypothetical/Global homology	Conserved hypothetical protein		Q92NI6
SMc01605		CDS	2.97399	0.000512143	4.39943	0.000512143	P.I	IV.D Transport of small molecules	Putative periplasmic binding ABC transporter	K02055	Q92NI5
SMc01606		CDS	2.49967	0.000512143	2.18747	0.000512143	P.I	IV.D Transport of small molecules	Transport system permease	K02054	Q92NI4
SMc01608		CDS			1.83416	0.000512143	P.III	IV.D Transport of small molecules	Putative ATP-binding ABC transporter	K02052	Q92NI2
SMc01609	ribH2	CDS	1.63936	0.00285916	1.98843	0.000512143	P.I	I.B.7 riboflavin	Putative 6,7-dimethyl-8-ribityllumazine synthase	K00794	Q92NI1
SMc01616	eryC	CDS	-1.33852	0.0091608			P.II	I.I.4 carbon compounds	Putative D-erythrulose-1-phosphate dehydrogenase	K21909	Q92NH6
SMc01620	eryB	CDS	-1.28956	0.00213505			P.II	I.I.4 carbon compounds	Putative erythritol phosphate dehydrogenase	K21054	Q92NH3
SMc01621	fucA1	CDS	-2.28933	0.000512143			P.II	I.I.4 carbon compounds	Putative L-fuculose phosphate aldolase	K01628	Q92NH2
SMc01628		CDS	-1.90389	0.000512143			P.II	IV.D Transport of small molecules	Putative polyol ABC transporter,periplasmic solute-binding component	K02027	Q92NG5
SMc01632		CDS			-1.56416	0.000512143	P.III	IV.D Transport of small molecules	Substrate-binding periplasmic protein precursor	K11069	Q92NG1
SMc01634		CDS			-2.07497	0.00602255	P.III	IV.D Transport of small molecules	Transport system permease	K11070	Q92NF9
SMc01641	caiD	CDS	2.58489	0.000512143	4.79193	0.000512143	P.I	I.I.1 fatty acid	Carnitinyl-CoA dehydratase	K08299	Q92NF2
SMc01647		CDS	1.14292	0.00354496			P.II	IV.D Transport of small molecules	Probable ABC transporter	K02035	Q92NE7
SMc01648		CDS	1.08791	0.00482954	1.14053	0.00137247	P.I	I Small Molecule Metabolism	Putative hydrolase	K06978	Q92NE6
SMc01649		CDS			1.5326	0.00354496	P.III	VI.B Hypothetical/Partial homology	Hypothetical protein	K09964	Q92K31
SMc01652		CDS	-1.25913	0.00354496			P.II	IV.D.2 amino acids, amines, peptides	Putative putrescine and agmatine ABC transporter,periplasmic solute-binding component	K02055	Q92NE3
SMc01657	fhuA2	CDS			-3.86182	0.000512143	P.III	IV.E Transport of large molecules	Putative ferrichrome-iron receptor precursor protein	K02014	Q926C6
SMc01658		CDS			-2.41556	0.000512143	P.III	IV.E Transport of large molecules	Putative ferric iron reductase	K13255	Q92ND8
SMc01659		CDS			-2.09103	0.000512143	P.III	IV.D Transport of small molecules	Putative ABC transporter,periplasmic component	K02016	Q92ND7
SMc01660		CDS	-1.52408	0.00805017			P.II	VI.C Hypothetical/Global homology	Conserved hypothetical protein		Q92ND6
SMc01665		CDS	1.15816	0.00354496	1.58522	0.000512143	P.I	VI.C Hypothetical/Global similarity	Hypothetical transmembrane protein		Q92ND1
SMc01666	mdeA	CDS			1.36984	0.000512143	P.III	I.A.12 methionine	Putative methionine gamma-lyase	K01761	Q92ND0
SMc01705		CDS	2.50947	0.000512143	1.98812	0.000512143	P.I	VI.C Hypothetical/Global homology	Conserved hypothetical protein	K19055	Q92SE2
SMc01712	lldD	CDS	-1.4707	0.000512143			P.II	I.H.3 aerobic respiration	Putative L-lactate dehydrogenase (cytochrome) protein	K00101	Q92SE6
SMc01719	mcpT	CDS	-1.08419	0.00944057			P.II	IV.C Mobility chemotaxis	Probable chemoreceptor (methyl-accepting chemotaxis) transmembrane protein	K03406	Q92SF2
SMc01721	oxaA	CDS	-1.72088	0.000512143			P.II	III.B.1 membrane, inner	Putative inner-membrane transmembrane protein	K03217	Q92SF5
SMc01722	engB	CDS	-1.2487	0.0009592			P.II	IV.A Cell division	Putative GTP-binding protein	K03978	Q92SF6
SMc01723		CDS	5.58116	0.000512143	5.94044	0.000512143	P.I	VI.C Hypothetical/Global homology	Hypothetical transmembrane protein		Q92SF7
SMc01724	msrB3	CDS	4.8679	0.000512143	5.48099	0.000512143	P.I	I.F.3 sulfur metabolism	Putative peptide methionine sulfoxide reductase MsrB	K07305	Q92SF8
SMc01725		CDS			1.93611	0.000512143	P.III	VI.C Hypothetical/Global homology	Conserved hypothetical transmembrane protein		Q92SF9
SMc01730		CDS	-1.85943	0.000512143			P.II	VI.C Hypothetical/Global homology	Conserved hypothetical protein	K07025	Q92SG4
SMc01731		CDS	-2.44639	0.000512143			P.II	VI.B Hypothetical/Partial homology	Hypothetical protein	K06966	Q92KR1
SMc01732	dapD	CDS	-1.14548	0.00354496			P.II	I.A.13 lysine	Probable2,3,4,5-tetrahydropyridine-2-carboxylateN-succinyltransferase	K00674	Q92SG5
SMc01740		CDS			1.42812	0.000512143	P.III	I Small Molecule Metabolism	Putative (S)-2-hydroxy-acid oxidase	K00101	Q92NB8
SMc01741		CDS			1.80179	0.000512143	P.III	VI.C Hypothetical/Global homology	Hypothetical protein		Q92NB7
SMc01747	hmuP	CDS			-2.606	0.00137247	P.III	IV.D Transport of small molecules	Regulatory protein that modulates hemin acquisition by regulating shmR transcription.		Q92K08
SMc01754		CDS			-1.706	0.000512143	P.III	I Small Molecule Metabolism	Multicopper oxidase signal peptide		Q92QV6
SMc01756	aspS	CDS	-2.3029	0.000512143	-1.13443	0.00602255	P.I	II.D.1 amino acyl tRNA synthesis; tRNA modification	Probable aspartyl-tRNA synthetase	K01876	Q92QV4
SMc01757		CDS			1.74286	0.000512143	P.III	VI.C Hypothetical/Global homology	Conserved hypothetical protein		Q92QV3
SMc01758	groEL4	CDS	2.1292	0.000512143	1.39286	0.0009592	P.I	IV.B Chaperoning	6 KD chaperonin B (GroEL) protein		P35470
SMc01759		CDS	2.1939	0.000512143	1.69349	0.0009592	P.I	VI.C Hypothetical/Global homology	Conserved hypothetical protein		Q92QV2
SMc01761	parC	CDS	-1.52076	0.000512143			P.II	II.B.8 DNA - replication, repair, restr./modif.	Probable topoisomerase IV subunit A	K02621	Q59749
SMc01766	hemB	CDS	-2.46609	0.000512143			P.II	I.B.4 heme, porphyrin	Probable delta-aminolevulinic acid dehydratase	K01698	Q92QU9
SMc01770	glyA1	CDS	-1.39775	0.0009592			P.II	I.A.11 glycine	Probable serine hydroxymethyltransferase	K00600	Q92QU6
SMc01771	nrdR	CDS	-1.01063	0.00749637			P.II	VI.A Not classified regulator	Putative transcriptional repressor	K07738	P58259
SMc01772	ribD	CDS	-1.05708	0.00573901			P.II	I.B.7 riboflavin	Probable riboflavin biosynthesis protein (deaminase/reductase)	K11752	Q92QU5
SMc01774		CDS	5.85441	0.000512143			P.II	VI.C Hypothetical/Global homology	Hypothetical protein signal peptide		Q92QU3
SMc01775		CDS			1.40593	0.00387636	P.III	I Small Molecule Metabolism	Putative acetyltransferase		Q92QU2
SMc01776		CDS			1.19018	0.00544021	P.III	VI MISCELLANEOUS	Auxin-binding protein		Q92QU1
SMc01778	nusB	CDS	-1.96201	0.000512143			P.II	II.B.6 RNA synthesis, modification , DNA transcription	Putative N utilization substance protein B	K03625	Q92QT9
SMc01779		CDS	-1.67426	0.000512143	-1.12446	0.00387636	P.I	IV.D Transport of small molecules	MFS-type transporter		Q92QT8
SMc01780	hppA	CDS	1.45333	0.00805017	3.06397	0.000512143	P.I	I.G Energy transfer	Putative pyrophosphate-energized proton pump	K15987	Q8VRZ3
SMc01782		CDS	-1.51241	0.000512143			P.II	VI.B Hypothetical/Partial homology	Hypothetical protein	K17662	Q92KF4
SMc01783		CDS	-1.92782	0.000512143	-1.20034	0.00137247	P.I	VI.C Hypothetical/Global homology	Conserved hypothetical protein		Q92QT6
SMc01784	plsX	CDS	-1.48187	0.000512143			P.II	I.C Fatty acid biosynthesis	Putative fatty acid/phospholipid synthesis protein	K03621	Q92QT5
SMc01785	fabH	CDS	-1.21782	0.00213505			P.II	I.C Fatty acid biosynthesis	Probable 3-oxoacyl-acyl-carrier-protein synthase III	K00648	Q92QT4
SMc01788		CDS	3.82599	0.00285916	3.54635	0.000512143	P.I	VI.B Hypothetical/Partial homology	Hypothetical protein		Q92QT1
SMc01792		CDS	-1.28933	0.0069235			P.II	III.A.1 surface polysaccharides/antigens	Putative surface polysaccharide biosynthesis glycosyltransferase	K03606 K20997	Q92QS6
SMc01793		CDS	-2.21061	0.000512143			P.II	III.A.1 surface polysaccharides/antigens	Putative glycosyltransferase		Q92QS5
SMc01794		CDS	-1.42507	0.000512143			P.II	III.A.1 surface polysaccharides/antigens	Putative polysaccharide export system periplasmic transmembrane protein	K01991	Q92QS4
SMc01795		CDS	-1.3734	0.000512143			P.II	III.A.1 surface polysaccharides/antigens	Surface polysaccharide transport protein		Q92QS3
SMc01801	argC	CDS			1.43584	0.00320928	P.III	I.A.17 arginine	Probable N-acetyl-gamma-glutamyl-phosphate reductase	K00145	Q92QR7
SMc01803	rpsI	CDS	-3.03667	0.000512143	-2.21721	0.000512143	P.I	II.C.2 ribosomal proteins - synthesis, modification	Probable 3S ribosomal protein S9	K02996	Q92QR5
SMc01804	rplM	CDS	-3.15082	0.000512143	-2.3335	0.000512143	P.I	II.C.2 ribosomal proteins - synthesis, modification	Probable 5S ribosomal protein L13	K02871	Q92QR4
SMc01806		CDS	-1.30689	0.000512143			P.II	I.I.1 fatty acid	Putative enoyl CoA hydratase		Q92QR2
SMc01808		CDS			1.08841	0.00285916	P.III	VI.C Hypothetical/Global homology	Conserved hypothetical protein	K06929	Q92QR0
SMc01810		CDS			2.346	0.000512143	P.III	VI.C Hypothetical/Global homology	Conserved hypothetical protein	K06995	Q92QQ8
SMc01812		CDS	-1.71318	0.000512143	-1.04357	0.00513758	P.I	I Small Molecule Metabolism	Putative cytochrome P45-like monooxygenase		Q92QQ5
SMc01813		CDS			1.61492	0.000512143	P.III	VI.C Hypothetical/Global homology	Conserved hypothetical protein		Q92QQ4
SMc01814		CDS	-1.39313	0.000512143	-2.31263	0.000512143	P.I	I.F.18 pool of unassigned individual reversibles reactions	Probable glutamate synthase small chain	K17722	Q92N00
SMc01815		CDS			-2.96625	0.000512143	P.III	I Small Molecule Metabolism	Dihydropyrimidine dehydrogenase family protein	K17723	Q92MZ9
SMc01820		CDS			-2.72538	0.000512143	P.III	I.F Central intermediary metabolism	Putative N-carbamyl-L-amino acid amidohydrolase	K06016	Q92MZ4
SMc01821	dht	CDS			-3.09838	0.000512143	P.III	I.F Central intermediary metabolism	Putative D-hydantoinase (dihydropyrimidinase)	K01464	Q92MZ3
SMc01827		CDS			-1.9285	0.000512143	P.III	IV.D.6 nucleosides, purines pyrimidines	Putative uracil and uridine ABC transporter,periplasmic solute-binding protein	K02051	Q92K04
SMc01828		CDS	-2.13787	0.000512143			P.II	IV.D Transport of small molecules	Multidrug resistance protein	K02005	Q92MY7
SMc01829		CDS	-2.44296	0.000512143			P.II	IV.D Transport of small molecules	Multidrug resistance protein		Q92MY6
SMc01837	ureC	CDS			1.28543	0.0009592	P.III	I.F.5 nitrogen metabolism	Urease alpha subunit	K01428	P42885
SMc01838		CDS			1.07785	0.00513758	P.III	I.F.5 nitrogen metabolism	Putative urease accessory protein		P42880
SMc01845	mltB2	CDS	1.12062	0.00544021	1.52305	0.000512143	P.I	II.A.3 degradation of polysaccharides	Membrane-bound lytic murein transglycosylase B		Q92NK3
SMc01847	btaB	CDS	6.36086	0.000512143	8.47425	0.00387636	P.I	III.B Cell envelope	S-adenosylmethionine : diacylgycerolhomoserine-N-methyltransferase	K13623	Q92NK5
SMc01848	btaA	CDS	7.56606	0.000512143	7.99708	0.000512143	P.I	III.B Cell envelope	Protein required for diacylglyceryl-N,N,N-trimethylhomoserine biosynthesis	K13622	Q92NK6
SMc01851		CDS			1.43404	0.000512143	P.III	IV.D.2 amino acids, amines, peptides	Probable amino acid exporter		Q92NK8
SMc01852	pfp	CDS			1.55117	0.000512143	P.III	I.H.8 glycolysis	Probable pyrophosphate--fructose 6-phosphate 1-phosphotransferase	K00895	Q92NK9
SMc01853	djlA	CDS	-1.70803	0.00213505			P.II	IV.B Chaperoning	DnaJ-like protein	K05801	Q92K37
SMc01854	amiD	CDS	-1.62811	0.0069235			P.II	III.B.3 murein sacculus, peptidoglycan	Probable N-acetylmuramoyl-L-alanine amidase	K01447	Q92NL0
SMc01855		CDS	4.54913	0.000512143			P.II	III.B Cell envelope	Putative membrane-bound lytic transglycosylase,signal peptide		Q92NL1
SMc01860	ftsI	CDS	-1.40128	0.00213505			P.II	III.B.3 murein sacculus, peptidoglycan	Probable peptidoglycan synthetase	K03587	Q92NL5
SMc01863	mraY	CDS	-1.32311	0.000512143			P.II	III.B.3 murein sacculus, peptidoglycan	Probable phospho-N-acetylmuramoyl-pentapeptide transferase	K01000	Q52952
SMc01864	murD	CDS	-1.0754	0.00632638			P.II	III.B.3 murein sacculus, peptidoglycan	Probable UDP-N-acetylmuramoylalanine--D-glutamate ligase	K01925	Q52953
SMc01869		CDS	-1.89112	0.000512143	-2.98352	0.000512143	P.I	IV.D Transport of small molecules	Probable MFS permease		Q92NM2
SMc01875	lpxC	CDS	-1.48322	0.000512143			P.II	III.A.1 surface polysaccharides/antigens	Probable UDP-3-O-3-hydroxymyristoyl N-acetylglucosamine deacetylase	K02535	Q92NM5
SMc01877	recN	CDS	-1.07089	0.00513758			P.II	II.B.8 DNA - replication, repair, restr./modif.	Probable DNA repair protein	K03631	Q92NM7
SMc01879		CDS	2.28561	0.000512143	1.49924	0.00285916	P.I	VI.C Hypothetical/Global homology	Conserved hypothetical protein	K07032	Q92NM9
SMc01880	panC	CDS	-2.25231	0.000512143			P.II	I.B.11 pantothenate	Probable pantoate--beta-alanine ligase	K01918	Q92NN0
SMc01881	panB	CDS	-1.90759	0.000512143			P.II	I.B.11 pantothenate	Probable 3-methyl-2-oxobutanoate hydroxymethyltransferase	K00606	Q92NN1
SMc01882		CDS	-1.26335	0.00544021			P.II	VI.C Hypothetical/Global homology	Conserved hypothetical protein,inner membrane protein		Q92NN2
SMc01883		CDS	-1.64266	0.00176271			P.II	VI.C Hypothetical/Global homology	Hypothetical transmembrane protein		Q92NN3
SMc01902		CDS			1.35079	0.00749637	P.III	VI.D Unknown	Hypothetical protein		Q92QS9
SMc01904	clpX	CDS	-1.1792	0.00320928			P.II	II.A.4 degradation of proteins, peptides, glycopeptides	Probable ATP-dependent CLP protease ATP-binding subunit	K03544	Q92QQ2
SMc01906	hupB	CDS	-2.29163	0.000512143			P.II	II.C.1 basic proteins - synthesis, modification	DNA-binding protein HU	K03530	P02344
SMc01907		CDS	6.01928	0.000512143	6.27655	0.000512143	P.I	VI.B Hypothetical/Partial homology	Hypothetical transmembrane protein	K01077	Q92KF3
SMc01908		CDS	-1.17893	0.00176271			P.II	VI.A Not classified regulator	Transcription regulator MarR family		Q92QQ1
SMc01910		CDS			-1.22713	0.00805017	P.III	VI.B Hypothetical/Partial homology	Hypothetical protein		Q92KF2
SMc01912	nuoA1	CDS	-1.98128	0.00213505			P.II	I.H.3 aerobic respiration	NADH dehydrogenase I chain A	K00330	O68852
SMc01913	nuoB1	CDS	-2.04727	0.000512143			P.II	I.H.3 aerobic respiration	NADH-ubiqionone oxidoreductase subunit K transmembrane protein	K00331	O68853
SMc01914	nuoC1	CDS	-1.76823	0.000512143			P.II	I.H.3 aerobic respiration	NADH dehydrogenase I chain C	K00332	O68854
SMc01915	nuoD1	CDS	-1.5627	0.000512143			P.II	I.H.3 aerobic respiration	Probable NADH-quinone oxidoreductase subunit D 1	K00333	P56907
SMc01917	nuoE1	CDS	-1.1252	0.00452512			P.II	I.H.3 aerobic respiration	NADH dehydrogenase I chain E	K00334	P56909
SMc01920	nuoG1	CDS	-1.55661	0.000512143			P.II	I.H.3 aerobic respiration	Probable NADH dehydrogenase I chain G	K00336	Q92QP6
SMc01921	nuoH	CDS	-1.98509	0.000512143	-1.28022	0.000512143	P.I	I.H.3 aerobic respiration	Probable NADH dehydrogenase I chain H transmembrane protein	K00337	Q92QP5
SMc01922	nuoI	CDS	-2.07554	0.000512143			P.II	I.H.3 aerobic respiration	Probable NADH-ubiquinone oxidoreductase chain I	K00338	Q92QP4
SMc01923	nuoJ	CDS	-1.14232	0.00285916	-1.17096	0.00176271	P.I	I.H.3 aerobic respiration	Probable NADH dehydrogenase I chain J transmembrane protein	K00339	Q92QP3
SMc01924	nuoK1	CDS	-1.86842	0.000512143			P.II	I.H.3 aerobic respiration	Probable NADH dehydrogenase I chain K transmembrane protein	K00340	Q92QP2
SMc01925	nuoL	CDS	-1.55432	0.00720208			P.II	I.H.3 aerobic respiration	Probable NADH dehydrogenase I chain L transmembrane protein	K00341	Q92QP1
SMc01927	nuoN	CDS	-1.42307	0.00573901			P.II	I.H.3 aerobic respiration	Probable NADH dehydrogenase I chain N transmembrane protein	K00343	Q92QN9
SMc01929		CDS	-1.5507	0.000512143			P.II	II.B.6 RNA synthesis, modification , DNA transcription	Ribonuclease J	K12574	Q92QN7
SMc01930		CDS	-1.15332	0.00354496			P.II	I Small Molecule Metabolism	Putative methylmalonyl-CoA epimerase	K05606	Q92QN6
SMc01934	proS	CDS	-1.40875	0.000512143			P.II	II.D.1 amino acyl tRNA synthesis; tRNA modification	Probable prolyl-tRNA synthetase	K01881	Q92QN2
SMc01935	lolC	CDS	-1.11276	0.00573901			P.II	IV.E Transport of large molecules	Putative lipoprotein-releasing system transmembrane protein	K09808	Q92QN1
SMc01940		CDS			1.17867	0.00320928	P.III	VI.B Hypothetical/Partial homology	Hypothetical protein	K09984	P42878
SMc01944	cpo	CDS	-2.0388	0.000512143	-2.05727	0.000512143	P.I	IV.G.4 detoxification	Non-heme chloroperoxidase F (Chloride peroxidase,CPO-F)	K00433	Q92MX7
SMc01946	livK	CDS	-2.79666	0.000512143	-4.58489	0.000512143	P.I	IV.D.2 amino acids, amines, peptides	Putative leucine-specific binding protein precursor	K01999	Q926C5
SMc01947		CDS	-1.59891	0.000512143	-3.69887	0.000512143	P.I	VI.C Hypothetical/Global homology	Conserved hypothetical transmembrane protein		Q92MX5
SMc01948	livF	CDS	-2.75054	0.00213505	-3.71918	0.00137247	P.I	IV.D.2 amino acids, amines, peptides	Probable high-affinity branched-chain amino acid transport ATP-binding ABC transporter	K01996	Q92MX4
SMc01949	livG	CDS	-2.82321	0.000512143	-3.85585	0.000512143	P.I	IV.D.2 amino acids, amines, peptides	Probable high-affinity branched-chain amino acid transport ATP-binding ABC transporter	K01995	Q92MX3
SMc01950	livM	CDS	-2.82631	0.000512143	-3.98268	0.000512143	P.I	IV.D.2 amino acids, amines, peptides	ABC-type branched-chain amino acid transport system,permease component	K01998	Q92MX2
SMc01951	livH	CDS	-2.50167	0.000512143	-2.83278	0.000512143	P.I	IV.D.2 amino acids, amines, peptides	Probable high-affinity branched-chain amino acid transport permease ABC transporter	K01997	Q92MX1
SMc01952	cysQ	CDS	-1.35765	0.000512143			P.II	I.F.3 sulfur metabolism	3'(2'),5'-bisphosphate nucleotidase	K01082	Q92MX0
SMc01960		CDS	1.49695	0.000512143	2.34802	0.000512143	P.I	I Small Molecule Metabolism	Oxidoreductase		Q92MW5
SMc01961		CDS			1.67856	0.000512143	P.III	VI.C Hypothetical/Global homology	Conserved hypothetical protein	K15975	Q92MW4
SMc01966		CDS	-1.10385	0.00387636			P.II	IV.D Transport of small molecules	Putative spermidine/putrescine-binding periplasmic ABC transporter	K02055	Q92MV9
SMc01969		CDS			-1.12849	0.00213505	P.III	I.F.14 amino acids	Aminotransferase		Q92MV6
SMc01972	puuB	CDS	-1.63138	0.000512143			P.II	I.I.2 amines	Putative gamma-glutamylputrescine oxidoreductase	K09471	Q92MV3
SMc01974		CDS	-1.38332	0.00176271			P.II	VI.A Not classified regulator	Transcription regulator GntR family		Q92MV1
SMc01977		CDS	-1.35771	0.000512143	-1.5782	0.000512143	P.I	IV.D Transport of small molecules	Sugar-binding periplasmic protein precursor	K02027	Q92MU8
SMc01978		CDS			-1.37929	0.00482954	P.III	IV.D Transport of small molecules	Putative sugar transport system permease ABC transporter	K02025	Q92MU7
SMc01981		CDS	2.11502	0.000512143	3.57937	0.000512143	P.I	I.G.1 electron transport	Putative cytochrome C transmembrane protein	K08738	Q92MU4
SMc01982	coxM	CDS	4.08983	0.000512143	3.74702	0.000512143	P.I	I.G.1 electron transport	Probable alternative cytochrome C oxidase polypeptide II transmembrane protein	K02275	Q92MU3
SMc01983	coxN	CDS	3.31483	0.000512143	3.01157	0.000512143	P.I	I.G.1 electron transport	Probable alternative cytochrome C oxidase polypeptide I transmembrane protein	K02274	Q92MU2
SMc01984	coxO	CDS	3.01349	0.00420562	2.75325	0.00452512	P.I	I.G.1 electron transport	Probable cytochrome-C oxidase transmembrane protein	K02276	Q92MU1
SMc01985	coxP	CDS	4.05813	0.0009592	3.72381	0.000512143	P.I	I.G.1 electron transport	Cytochrome c oxidase subunit III	K02276	Q92MU0
SMc01987		CDS			1.80075	0.000512143	P.III	I.I.2 amines	Dimethylglycine dehydrogenase		Q92MT9
SMc01995		CDS	1.85955	0.00602255			P.II	VI.C Hypothetical/Global homology	Conserved hypothetical protein		Q92MY0
SMc02025		CDS			-1.24891	0.0009592	P.III	IV.D.2 amino acids, amines, peptides	Periplasmic dipeptide transport protein precursor	K02035	Q92MS4
SMc02026		CDS	-1.88846	0.0009592			P.II	IV.G.2 drug/analog sensitivity and resistance	Putative beta-lactamase precursor protein	K17836	Q926C4
SMc02041		CDS	-1.84456	0.00970149			P.II	I Small Molecule Metabolism	Short-chain dehydrogenase/reductase involved in monomethyl succinate utilization		Q92MQ9
SMc02050	tig	CDS	-1.935	0.000512143			P.II	IV.B Chaperoning	Probable trigger factor	K03545	Q92Q12
SMc02051		CDS	-1.89647	0.000512143	1.5071	0.00420562	P.I	VI.C Hypothetical/Global homology	Conserved hypothetical protein		Q92Q13
SMc02052		CDS	-3.65816	0.000512143	1.25801	0.00632638	P.I	VI.C Hypothetical/Global homology	Conserved hypothetical protein		Q92Q14
SMc02053	trmFO	CDS	-2.13926	0.000512143			P.II	II.D.1 amino acyl tRNA synthesis; tRNA modification	Methylenetetrahydrofolate--tRNA-(uracil-5-)-methyltransferase	K04094	Q92Q15
SMc02055	crtB	CDS	-1.29404	0.000512143	-1.16646	0.0009592	P.I	I Small Molecule Metabolism	Putative phytoene synthase	K02291	Q92Q17
SMc02057	secD1	CDS	-1.46686	0.000512143			P.II	IV.E.2 protein, peptide secretion	Putative protein-export membrane protein	K12257	Q92Q19
SMc02058		CDS	-2.30703	0.000512143			P.II	IV.E.2 protein, peptide secretion	Probable YajC protein	K03210	Q92Q20
SMc02060	lppB	CDS	-1.45692	0.0009592			P.II	III.B.2 membrane, outer	Lipoprotein precursor	K06194	Q926D2
SMc02061	bioS	CDS	-1.87043	0.000512143	-1.41967	0.000512143	P.I	VI MISCELLANEOUS	Biotin-regulated protein		O08250
SMc02062	pcm	CDS	-1.71272	0.00805017			P.II	II.B.7 proteins and peptides - translation and modification	L-isoaspartyl protein carboxyl O-methyltransferase (PCMT),increased transcription during biotin limitation	K00573	O08249
SMc02064	serS	CDS	-2.46692	0.00137247			P.II	II.D.1 amino acyl tRNA synthesis; tRNA modification	Probable seryl-tRNA synthetase (serine--tRNA ligase)	K01875	Q92Q22
SMc02071		CDS	-1.03541	0.00832418			P.II	III.B.3 murein sacculus, peptidoglycan	Putative Beta-hexosaminidase	K01207	Q92Q29
SMc02073	argS	CDS	-2.88748	0.000512143	-1.27932	0.000512143	P.I	II.D.1 amino acyl tRNA synthesis; tRNA modification	Probable arginyl-tRNA synthetase (arginine--tRNA ligase)	K01887	Q92Q31
SMc02079	fad	CDS	-1.13283	0.00995897			P.II	III.B.2 membrane, outer	Putative outer membrane protein	K06076	Q92Q36
SMc02080	valS	CDS	-1.2318	0.00452512			P.II	II.D.1 amino acyl tRNA synthesis; tRNA modification	Probable valyl-tRNA synthetase (valine--tRNA ligase)	K01873	Q92Q37
SMc02081		CDS	-1.2756	0.000512143			P.II	VI.B Hypothetical/Partial homology	Hypothetical protein	K09991	Q92KD4
SMc02083		CDS	-1.14639	0.00250247			P.II	VI MISCELLANEOUS	Methyltransferase	K00573	Q92Q39
SMc02084	exbD	CDS			-1.57803	0.00573901	P.III	IV.E Transport of large molecules	Probable biopolymer transport transmembrane protein	K03559	Q92Q40
SMc02085	exbB	CDS			-1.7807	0.000512143	P.III	IV.E Transport of large molecules	Probable biopolymer transport transmembrane protein	K03561	Q92Q41
SMc02086		CDS	1.45122	0.000512143	1.55738	0.000512143	P.I	VI.B Hypothetical/Partial homology	Hypothetical transmembrane protein		Q92KD5
SMc02094	omp	CDS	-1.37013	0.00482954			P.II	III.B.2 membrane, outer	Putative outer membrane transmembrane protein	K07277	Q92Q48
SMc02098	rrf	CDS	-1.16809	0.0009592			P.II	II.B.7 proteins and peptides - translation and modification	Probable ribosome recycling factor (ribosome releasing factor)	K02838	Q92Q52
SMc02099	pyrH	CDS	-2.3492	0.000512143	-1.183	0.00213505	P.I	I.F.9 nucleotide interconversions	Probable uridylate kinase	K09903	Q92Q53
SMc02100	tsf	CDS	-1.72969	0.000512143			P.II	II.B.7 proteins and peptides - translation and modification	Probable elongation factor TS (EF-TS) protein	K02357	Q92Q54
SMc02101	rpsB	CDS	-1.69546	0.000512143			P.II	III.C.2 ribosomal proteins - synthesis, modification	Probable 3S ribosomal protein S2	K02967	Q92Q55
SMc02104		CDS	1.02343	0.00995897	1.01299	0.00661481	P.I	VI.C Hypothetical/Global similarity	Hypothetical protein	K01126	Q92Q58
SMc02105		CDS			1.04104	0.00777209	P.III	VI.C Hypothetical/Global homology	Conserved hypothetical protein	K09919	Q92Q59
SMc02106		CDS	1.40668	0.000512143	2.00231	0.000512143	P.I	VI.C Hypothetical/Global similarity	Histidine triad (HIT) family protein	K02503	Q92Q60
SMc02109	clpA	CDS			1.35329	0.00213505	P.III	II.A.4 degradation of proteins, peptides, glycopeptides	Probable ATP-dependent CLP protease ATP-binding subunit	K03694	Q92Q62
SMc02110	clpS1	CDS	1.0957	0.00482954	1.631	0.000512143	P.I	II.A.4 degradation of proteins, peptides, glycopeptides	Putative ATP-dependent Clp protease adapter protein clpS 1	K06891	Q92Q63
SMc02111		CDS	4.00327	0.000512143	6.1887	0.000512143	P.I	VI.C Hypothetical/Global homology	Conserved hypothetical protein		Q92Q64
SMc02112		CDS	-1.35955	0.000512143			P.II	VI.C Hypothetical/Global homology	Hypothetical unknown protein		Q92Q65
SMc02116		CDS	-1.41154	0.000512143			P.II	I.I.4 carbon compounds	Putative salicylate hydroxylase	K00480	Q92Q69
SMc02119	aapQ	CDS			-1.46991	0.000512143	P.III	IV.D.2 amino acids, amines, peptides	Probable general L-amino acid transport permease ABC transporter	K09970	Q92Q72
SMc02120	aapM	CDS			-1.7709	0.000512143	P.III	IV.D.2 amino acids, amines, peptides	Probable general L-amino acid transport permease ABC transporter	K09971	Q92Q73
SMc02122	fpr	CDS	-2.04395	0.000512143	-1.04553	0.00861167	P.I	I.F.18 pool of unassigned individual reversibles reactions	Probable ferredoxin--NADP reductase	K00528	Q92Q76
SMc02138	argD	CDS	-1.25987	0.00137247			P.II	I.A.17 arginine	Acetylornithine aminotransferase	K00821	Q92SA0
SMc02139		CDS	-1.50915	0.000512143			P.II	VI.C Hypothetical/Global homology	Conserved hypothetical protein	K13583	Q92KP9
SMc02140	phoB	CDS	4.35425	0.000512143	5.15452	0.000512143	P.I	I.E.1 global regulatory functions	Phosphate regulon transcriptional regulatory protein	K07657	Q52990
SMc02141	phoU	CDS	3.98878	0.000512143	4.98092	0.000512143	P.I	IV.D Transport of small molecules	Probable phosphate transport system transcriptional regulator	K02039	Q52989
SMc02142	pstB	CDS	3.87451	0.000512143	5.00525	0.000512143	P.I	IV.D Transport of small molecules	Probable phosphate import ATP-binding ABC transporter	K02036	Q92SA1
SMc02143	pstA	CDS	4.45279	0.000512143	5.33075	0.000512143	P.I	IV.D Transport of small molecules	Putative phosphate transport system permease ABC transporter	K02038	Q92SA2
SMc02144	pstC	CDS	5.07475	0.000512143	5.86499	0.000512143	P.I	IV.D Transport of small molecules	Phosphate ABC transporter, inner membrane subunit	K02037	Q92SA3
SMc02146	pstS	CDS	6.18488	0.000512143	6.78388	0.000512143	P.I	IV.D Transport of small molecules	Phosphate binding periplasmic protein	K02040	Q92SA4
SMc02147	phoR	CDS			2.82328	0.000512143	P.III	I.E.1 global regulatory functions	Probable phosphate regulon sensor histidine kinase transmembrane protein	K07636	Q92SA5
SMc02150		CDS	-1.12949	0.00176271			P.II	VI.C Hypothetical/Global homology	Conserved hypothetical protein	K00459	Q92SA7
SMc02154		CDS	-1.70117	0.000512143			P.II	VI.B Hypothetical/Partial homology	Hypothetical protein	K07445	Q92KQ3
SMc02155		CDS	-1.77293	0.000512143			P.II	VI.B Hypothetical/Partial homology	Hypothetical protein	K06922	Q92KQ4
SMc02156		CDS	4.32543	0.000512143	4.73464	0.000512143	P.I	VI.C Hypothetical/Global homology	Conserved hypothetical protein	K10938	Q92SB8
SMc02157	cdsA2	CDS	1.82923	0.0009592			P.II	II.B.1 phospholipides	Putative phosphatidate cytidylyltransferase transmembrane protein	K00981	Q92SB9
SMc02160		CDS			2.2401	0.000512143	P.III	IV.D Transport of small molecules	Probable permease		Q92SC2
SMc02161	tep1	CDS			1.2287	0.000512143	P.III	IV.D Transport of small molecules	MFS permease involved in chloramphenicol resistance	K19577	Q92SC3
SMc02166	pyrC	CDS	-1.08949	0.00777209			P.II	I.D.1 pyrimidine ribonucleotide biosynthesis	Probable dihydroorotase	K01465	Q92SC7
SMc02172	frcR	CDS	1.58111	0.000512143	2.01887	0.000512143	P.I	VI.A Not classified regulator	Transcriptional regulator,ROK family		Q92SC9
SMc02173	frcS	CDS			1.99196	0.000512143	P.III	VI.C Hypothetical/Global homology	Conserved hypothetical protein	K02431	Q92SD0
SMc02175		CDS			1.79453	0.000512143	P.III	VI.A Not classified regulator	Putative cAMP-binding protein-catabolite gene activator	K10914	Q92SD2
SMc02176	cyaD1	CDS			1.10972	0.00250247	P.III	I.E.1 global regulatory functions	Putative adenylate cyclase transmembrane protein	K01768	Q92SD3
SMc02180		CDS			1.52292	0.00513758	P.III	VI.C Hypothetical/Global homology	Conserved hypothetical protein	K06940	Q92SD6
SMc02187	int	CDS	2.97219	0.000512143	2.40146	0.000512143	P.I	V.D Phage-related functions and prophages	Integrase		Q92SB7
SMc02201		CDS			1.49347	0.00573901	P.III	VI.C Hypothetical/Global homology	Conserved hypothetical protein		Q92SB5
SMc02217	metZ	CDS	-1.78235	0.000512143			P.II	I.A.12 methionine	Probable O-succinylhomoserine sulfhydrylase	K10764	Q92S95
SMc02218		CDS	-1.09317	0.00354496			P.II	I.F.2 2-prime-deoxyribonucleotide metabolism	Putative deoxycytidine triphosphate deaminase	K01494	Q92S94
SMc02224	chaA	CDS			1.10802	0.00777209	P.III	IV.D.4 cations	Putative calcium/proton antiporter transmembrane protein	K07300	Q92S90
SMc02230	podJ1	CDS	-1.17597	0.00749637			P.II	IV CELL PROCESSES	Hypothetical transmembrane protein		Q92KP5
SMc02232		CDS	-2.21055	0.000512143			P.II	VI.C Hypothetical/Global similarity	Hypothetical transmembrane protein	K07090	Q92S85
SMc02234		CDS	-2.02904	0.00285916			P.II	VI.C Hypothetical/Global similarity	Hypothetical transmembrane protein		Q92KP3
SMc02241		CDS	-1.76493	0.00176271	-1.65701	0.0009592	P.I	VI.C Hypothetical/Global homology	Conserved hypothetical protein		Q92S79
SMc02243		CDS			-1.31285	0.000512143	P.III	VI.B Hypothetical/Partial homology	Hypothetical transmembrane protein		Q92KP0
SMc02245	pyrD	CDS	-1.6285	0.00513758			P.II	I.D.1 pyrimidine ribonucleotide biosynthesis	Probable dihydroorotate dehydrogenase (dihydroorotate oxidase)	K00254	Q92S77
SMc02250	mscL	CDS	1.43564	0.000512143	2.16096	0.000512143	P.I	IV.D Transport of small molecules	Probable large-conductance mechanosensitive channel transmembrane protein	K03282	Q92S72
SMc02253	pchB	CDS	-1.61286	0.0009592			P.II	I Small Molecule Metabolism	Putative salycilate biosynthesis protein	K04782	Q92S69
SMc02255	qxtA	CDS			1.87695	0.00213505	P.III	I.G.1 electron transport	Putative quinol oxidase subunit I transmembrane protein	K00425	Q92S67
SMc02259		CDS			-1.36712	0.000512143	P.III	IV.D Transport of small molecules	Putative periplasmic binding ABC transporter	K02030	Q92S63
SMc02265	secD2	CDS	-1.68509	0.000512143			P.II	IV.E.2 protein, peptide secretion	Putative protein-export membrane protein	K12257	Q92S58
SMc02273	rkpA,wcbR	CDS	-1.80173	0.000512143			P.II	III.A.1 surface polysaccharides/antigens	Putative fatty acid synthase		Q92S51
SMc02274	rkpU	CDS	-1.84737	0.000512143			P.II	III.A.1 surface polysaccharides/antigens	Capsule polysaccharide exporter	K01991	Q92S50
SMc02275	pncA	CDS	-1.53131	0.000512143			P.II	I.F.1 salvage of nucleosides and nucleotides	Probable pyrazinamidase/nicotinamidase (includes: pyrazinamidase,nicotinamidase)	K08281	Q7APF6
SMc02277		CDS			1.88406	0.000512143	P.III	VI.C Hypothetical/Global homology	Hypothetical unknown protein		Q92S48
SMc02279		CDS	-1.04872	0.00573901			P.II	VI.C Hypothetical/Global similarity	Hypothetical signal peptide protein		Q92S46
SMc02283		CDS	-1.42964	0.00213505			P.II	I.G.1 electron transport	Putative copper-containing oxidoreductase signal peptide protein		Q92S42
SMc02297		CDS	1.25067	0.00513758			P.II	V.A Transposon-related functions	Putative integrase		Q92S32
SMc02305	murA	CDS	-1.40582	0.000512143			P.II	III.B.3 murein sacculus, peptidoglycan	Probable UDP-N-acetylglucosamine 1-carboxyvinyltransferase	K00790	Q92S27
SMc02306		CDS	-1.43887	0.000512143			P.II	VI.B Hypothetical/Partial homology	Hypothetical protein		Q92KN6
SMc02307	hisD1	CDS	-1.29303	0.00482954			P.II	I.A.4 histidine	Probable histidinol dehydrogenase	K00013	Q92S26
SMc02309		CDS	-1.28098	0.00137247			P.II	IV.G Protection responses	Putative arsenate reductase	K01104, K03741	Q92S24
SMc02310	infA	CDS	-1.71131	0.000512143			P.II	II.B.7 proteins and peptides - translation and modification	Probable translation initiation factor IF-1 protein	K02518	Q92S23
SMc02311	maf	CDS	-2.3778	0.000512143	-1.31171	0.00420562	P.I	IV.A Cell division	Putative septum formation protein	K06287	Q92S22
SMc02326		CDS			1.36612	0.0009592	P.III	VI.B Hypothetical/Partial homology	Hypothetical protein		Q92KN8
SMc02336	kduD	CDS	-1.12612	0.00544021			P.II	I Small Molecule Metabolism	2-deoxy-D-gluconate 3-dehydrogenase		Q92MQ0
SMc02337		CDS	-2.51677	0.000512143	-1.71181	0.000512143	P.I	IV.D.3 carbohydrates, organic acids, alcohols	ABC sugar transporter,fused ATP-binding domains	K10441	Q92MP8
SMc02338		CDS	-2.00965	0.000512143	-1.83847	0.000512143	P.I	IV.D.3 carbohydrates, organic acids, alcohols	Sugar-binding periplasmic protein precursor	K10439	Q92MP7
SMc02339		CDS			-1.35516	0.000512143	P.III	I Small Molecule Metabolism	Putative oxidoreductase		Q92MP6
SMc02342	tkt1	CDS			-2.10818	0.000512143	P.III	I.F.19 non oxidative branch, pentose pathway	Probable transketolase	K00615	Q92MP3
SMc02343		CDS			-3.49818	0.000512143	P.III	IV.D Transport of small molecules	Transport protein		Q92MP2
SMc02344		CDS			-2.90539	0.000512143	P.III	IV.D.2 amino acids, amines, peptides	Putative glycine-betaine and choline ABC transporter,periplasmic solute-binding component	K02051	Q92MP1
SMc02345		CDS	1.68497	0.00452512	-3.02994	0.000512143	P.I	IV.D.2 amino acids, amines, peptides	Putative glycine-betaine and choline ABC transporter,permease component	K02050	Q92MP0
SMc02346		CDS			-3.49697	0.000512143	P.III	IV.D.2 amino acids, amines, peptides	Putative glycine-betaine and choline ABC transporter,ATP-binding component	K02049	Q92MN9
SMc02347	asfB	CDS			-3.4115	0.000512143	P.III	I Small Molecule Metabolism	Putative ferredoxin AsfB iron-sulfur protein		Q92MN8
SMc02349	asfA	CDS	1.3678	0.00513758	-2.9524	0.000512143	P.I	I Small Molecule Metabolism	Oxidoreductase		Q92MN7
SMc02350		CDS			-3.49633	0.000512143	P.III	VI.C Hypothetical/Global homology	Conserved hypothetical protein		Q92MN6
SMc02351		CDS	-1.93213	0.000512143			P.II	VI.C Hypothetical/Global homology	Conserved hypothetical protein	K06886	Q92MN5
SMc02356		CDS			-1.39705	0.000512143	P.III	IV.D.2 amino acids, amines, peptides	Putative branched chain amino acid binding periplasmic ABC transporter	K01999	Q92MN0
SMc02365	degP1	CDS	1.21386	0.00420562			P.II	II.A.4 degradation of proteins, peptides, glycopeptides	Probable serine protease	K04771	Q52894
SMc02370	pepN	CDS	-1.67844	0.000512143			P.II	II.A.4 degradation of proteins, peptides, glycopeptides	Probable aminopeptidase N	K01256	Q92R84
SMc02372		CDS	-2.0273	0.000512143			P.II	IV.D Transport of small molecules	Putative MFS permease		Q92R82
SMc02373		CDS			2.71186	0.000512143	P.III	VI.C Hypothetical/Global homology	Hypothetical unknown protein		Q92R81
SMc02374		CDS			2.79487	0.000512143	P.III	VI.C Hypothetical/Global homology	Hypothetical unknown protein		Q92R80
SMc02376		CDS	-2.14241	0.000512143	-1.56015	0.000512143	P.I	IV.B Chaperoning	Putative heat shock protein	K04046	Q92R78
SMc02377	etf	CDS	-1.12698	0.00354496			P.II	I.G.1 electron transport	Probable electron transfer flavoprotein-ubiquinone oxidoreductase	K00311	Q92R77
SMc02379		CDS	-1.23385	0.000512143			P.II	IV.D.2 amino acids, amines, peptides	Probable glycine betaine ABC transporter,permease	K02001	Q92R75
SMc02386	amn	CDS			1.21338	0.00420562	P.III	I.F.1 salvage of nucleosides and nucleotides	Probable AMP nucleosidase	K01241	Q92R69
SMc02387		CDS	3.18077	0.000512143	1.4426	0.00832418	P.I	VI.C Hypothetical/Global homology	Hypothetical transmembrane protein	K09771	Q92R68
SMc02388		CDS	6.22624	0.000512143			P.II	VI.B Hypothetical/Partial homology	Hypothetical unknown transmembrane protein		Q92R67
SMc02397		CDS	-3.16868	0.000512143	-1.82723	0.000512143	P.I	V.D Phage-related functions and prophages	Putative integrase		Q92R59
SMc02400		CDS			1.86829	0.00176271	P.III	III.B.2 membrane, outer	Probable outer membrane protein		Q92R58
SMc02401		CDS	4.18111	0.000512143			P.II	VI.C Hypothetical/Global homology	Hypothetical transmembrane protein		Q92R57
SMc02403		CDS	2.32199	0.000512143	1.19971	0.000512143	P.I	II.B.3 murein sacculus, peptidoglycan	Probable soluble lytic murein transglycosylase	K08309	Q92R56
SMc02408	rpoZ	CDS	-2.04053	0.000512143			P.II	II.B.6 RNA synthesis, modification , DNA transcription	DNA-directed RNA polymerase omega subunit	K03060	Q92R52
SMc02415		CDS			-1.51552	0.0009592	P.III	IV.D.6 nucleosides, purines pyrimidines	Putative allantoin ABC transporter,periplasmic solute-binding component	K02035	Q92MM2
SMc02417		CDS			-3.20842	0.000512143	P.III	IV.D.6 nucleosides, purines pyrimidines	Putative allantoin and other purine derivative ABC transporter,periplasmic solute-binding component	K02035	Q92MM0
SMc02431		CDS			1.25041	0.0009592	P.III	VI.C Hypothetical/Global homology	Conserved hypothetical protein		Q92MK8
SMc02434		CDS			1.24355	0.00250247	P.III	VI.B Hypothetical/Partial homology	Hypothetical protein		Q92JZ8
SMc02436	prfA	CDS	-2.49651	0.000512143	-1.20841	0.000512143	P.I	II.B.7 proteins and peptides - translation and modification	Probable peptide chain release factor 1 (RF-1) protein	K02835	Q92MK5
SMc02437	ptsP	CDS	-1.50299	0.000512143			P.II	IV.D.3 carbohydrates, organic acids, alcohols	Probable phosphoenolpyruvate phosphotransferase PtsP (enzyme I-NTR)	K08484	Q92MK4
SMc02438	lysC	CDS	-2.49766	0.000512143	-1.68161	0.000512143	P.I	I.A.13 lysine	Probable aspartokinase	K00928	Q92MK3
SMc02443	grxC	CDS	-1.42267	0.00137247			P.II	I.B.6 thioredoxin, glutaredoxin, glutathione	Probable glutaredoxin 3 protein	K03676	Q92MJ8
SMc02447		CDS	-1.14795	0.00137247			P.II	VI.C Hypothetical/Global homology	Conserved hypothetical transmembrane protein		Q92MJ4
SMc02448	mutT	CDS	-1.36514	0.00320928	-1.34475	0.00354496	P.I	I.F.20 phosphorous metabolism	Putative mutator protein 7,8-dihydro-8-oxoguanine-triphosphatase	K03574	Q92MJ3
SMc02450	argJ	CDS	-1.58397	0.000512143			P.II	I.A.17 arginine	Probable Arginine biosynthesis bifunctional protein ArgJ	K00620	Q92MJ1
SMc02451		CDS	-1.35848	0.000512143			P.II	VI.C Hypothetical/Global homology	Conserved hypothetical protein,contains a peptidyl-prolyl cis-trans isomerase signature	K03769	Q92MJ0
SMc02463	sdhC	CDS	-1.92471	0.000512143			P.II	I.H.6 TCA cycle	Probable succinate dehydrogenase cytochrome B-556 subunit transmembrane protein	K00241	Q92LI1
SMc02464	sdhD	CDS	-1.26555	0.000512143			P.II	I.H.6 TCA cycle	Probable succinate dehydrogenase membrane anchor subunit	K00242	Q92LI2
SMc02465	sdhA	CDS	-1.47124	0.000512143			P.II	I.H.6 TCA cycle	Probable succinate dehydrogenase flavoprotein subunit	K00239	Q92LI3
SMc02466	sdhB	CDS	-1.719	0.000512143			P.II	I.H.6 TCA cycle	Probable succinate dehydrogenase iron-sulfur protein	K00240	Q92LI4
SMc02476		CDS	-1.13141	0.00602255			P.II	VI.C Hypothetical/Global homology	Conserved hypothetical protein	K07334	Q92LJ2
SMc02479	mdh	CDS			-1.1872	0.00544021	P.III	I.H.6 TCA cycle	Probable malate dehydrogenase	K00024	Q9EYJ6
SMc02482	sucA	CDS			-1.37776	0.00805017	P.III	I.H.6 TCA cycle	Probable 2-oxoglutarate dehydrogenase E1 component protein	K00164	Q7APA7
SMc02490		CDS	4.10134	0.000512143	3.82731	0.000512143	P.I	VI.C Hypothetical/Global homology	Conserved hypothetical protein		Q92LK2
SMc02491		CDS	2.0966	0.000512143	2.7374	0.000512143	P.I	VI.B Hypothetical/Partial homology	Hypothetical protein		Q92JU6
SMc02499	atpA	CDS	-1.95842	0.00250247			P.II	I.E.2 ATP-proton motive force interconversion	Probable ATP synthase subunit alpha	K02111	Q92LK6
SMc02501	atpD	CDS	-1.87403	0.000512143			P.II	I.E.2 ATP-proton motive force interconversion	Probable ATP synthase beta chain	K02112	Q92LK8
SMc02502	atpC	CDS	-1.93223	0.000512143			P.II	I.E.2 ATP-proton motive force interconversion	Probable ATP synthase epsilon chain	K02114	Q92LK9
SMc02505		CDS	-1.51687	0.000512143	-1.20457	0.00285916	P.I	VI.C Hypothetical/Global homology	Conserved hypothetical transmembrane protein,signal peptide		Q92JV1
SMc02508	sitB	CDS			-2.75532	0.00387636	P.III	IV.D.4 Cations	Manganese ABC transporter ATPase	K11607	Q92LL4
SMc02509	sitA	CDS			-2.29341	0.000512143	P.III	IV.D.4 cations	Manganese ABC transporter periplasmic substrate binding protein	K11604	Q92LL5
SMc02510	fur	CDS	-1.89687	0.000512143			P.II	I.E.1 global regulatory functions	Iron/manganese-dependent transcriptional regulator,repressor of the sitABCD operon in the presence of Mn(II)	K03711	Q92LL6
SMc02514		CDS	-1.65626	0.000512143	1.20097	0.0009592	P.I	IV.D Transport of small molecules	Putative glycerol-3-phosphate and glycerol ABC transporter,periplasmic solute-binding component	K17321	Q92LM0
SMc02518		CDS	-1.48929	0.000512143			P.II	IV.D Transport of small molecules	Putative glycerol-3-phosphate and glycerol ABC transporter,ATP-binding component	K17325	Q92LM3
SMc02520	glpD	CDS	1.2041	0.00602255	1.19043	0.00387636	P.I	I.F.11 misc. glycerol metabolism	Putative glycerol-3-phosphate dehydrogenase	K00111	Q92LM5
SMc02521	glpR	CDS			1.46444	0.00482954	P.III	I.F.11 misc. glycerol metabolism	Glycerol-3-phosphate regulon repressor	K02444	Q92LM6
SMc02522		CDS			1.42938	0.000512143	P.III	I Small Molecule Metabolism	Short-chain type dehydrogenase/reductase	K00059	Q92LM7
SMc02546	leuA2	CDS	-1.27475	0.000512143			P.II	I.A.1 leucine	Putative 2-isopropylmalate synthase	K01649	Q92R15
SMc02551	cysS	CDS	-1.31124	0.000512143			P.II	II.D.1 amino acyl tRNA synthesis; tRNA modification	Probable cysteinyl-tRNA synthetase	K01883	Q92R20
SMc02553		CDS	-1.29036	0.000512143			P.II	VI.C Hypothetical/Global homology	Conserved hypothetical protein		Q92R22
SMc02557		CDS			-0.998006	0.00805017	P.III	VI.B Hypothetical/Partial homology	Hypothetical protein		Q92KH0
SMc02562	pckA	CDS			-1.41385	0.0009592	P.III	I.F.13 gluconeogenesis	Phosphoenolpyruvate carboxykinase	K01610	P43085
SMc02563		CDS	-1.41115	0.00320928			P.II	VI.C Hypothetical/Global homology	Conserved hypothetical protein	K15034	Q92TB8
SMc02564		CDS			1.03114	0.00602255	P.III	VI.C Hypothetical/Global homology	Conserved hypothetical protein		Q92TB7
SMc02567	coaA	CDS	-1.41443	0.000512143			P.II	I.B.11 pantothenate	Probable pantothenate kinase	K00867	Q92TB5
SMc02569	hisF	CDS	-1.9201	0.000512143			P.II	I.A.4 histidine	Probable imidazole glycerol phosphate synthase subunit HisF	K02500	Q92TB3
SMc02572	hisH	CDS	-1.71921	0.000512143			P.II	I.A.4 histidine	Probable glutamine amidotransferase	K02501	Q92TB1
SMc02574	hisB	CDS	-1.76038	0.000512143			P.II	I.A.4 histidine	Probable imidazoleglycerol-phosphate dehydratase	K01693	Q92TB0
SMc02582		CDS	-1.47365	0.000512143	-2.05866	0.000512143	P.I	VI.C Hypothetical/Global homology	Conserved hypothetical protein		Q92TA3
SMc02584	actR	CDS	-1.54527	0.000512143			P.II	I.E.1 global regulatory functions	Two component response regulator,essential for acid-tolerance	K15012	P0C5S3
SMc02585	actS	CDS	-1.38236	0.000512143			P.II	I.E.1 global regulatory functions	Two component sensor histidine kinase,essential for acid-tolerance	K15011	Q92TA1
SMc02588		CDS	2.24338	0.00805017			P.II	IV.D Transport of small molecules	Putative permease ABC transporter	K05778	Q92T98
SMc02589		CDS	1.44423	0.000512143	1.90936	0.00320928	P.I	VI.C Hypothetical/Global homology	Conserved hypothetical protein	K05777	Q92T97
SMc02598	nadC	CDS	-1.43866	0.000512143			P.II	I.B.9 pyridine nucleotide	Probable nicotinate-nucleotide pyrophosphorylase carboxylating protein	K00767	Q92R31
SMc02599	nadB	CDS	-1.29332	0.000512143			P.II	I.B.9 pyridine nucleotide	Probable L-aspartate oxidase	K00278	Q92R32
SMc02600		CDS	-2.81106	0.000512143	-1.6396	0.00777209	P.I	VI.C Hypothetical/Global similarity	Hypothetical transmembrane protein	K07168	Q92T90
SMc02601	nadA	CDS	-2.33677	0.000512143			P.II	I.B.9 pyridine nucleotide	Probable quinolinate synthetase A	K03517	Q92R33
SMc02613	glnT	CDS	1.12969	0.00482954	1.26033	0.000512143	P.I	I.A.18 glutamine	Glutamine synthetase III	K01915	O87393
SMc02615		CDS	2.94243	0.00137247	1.80599	0.00250247	P.I	VI.B Hypothetical/Partial homology	Hypothetical signal peptide protein		Q92KU7
SMc02631		CDS	-1.60992	0.000512143			P.II	VI.C Hypothetical/Global homology	Conserved hypothetical protein	K07140	Q92R35
SMc02634	phoX	CDS	8.08505	0.000512143	8.50372	0.000512143	P.I	I.F.20 phosphorus metabolism	Monomeric alkaline phosphatase	K07093	Q92KH4
SMc02635	recO	CDS	1.77518	0.000512143	2.65021	0.000512143	P.I	II.B.8 DNA - replication, repair, restr./modif.	DNA repair protein	K03584	Q92KH5
SMc02636		CDS	-2.48194	0.000512143	-2.10872	0.000512143	P.I	VI.C Hypothetical/Global homology	Conserved hypothetical protein		Q92R37
SMc02637		CDS	-2.25763	0.00137247	-2.01423	0.0009592	P.I	VI.C Hypothetical/Global similarity	Hypothetical protein		Q92R38
SMc02641	rkpK	CDS	-1.12463	0.00832418			P.II	III.A.1 surface polysaccharides/antigens	UDP-glucose 6-dehydrogenase	K00012	O54068
SMc02645	cfa2	CDS			0.986053	0.00632638	P.III	I.C Fatty acid biosynthesis	Cyclopropane-fatty-acyl synthase	K00574	Q92R41
SMc02646		CDS	1.31014	0.00320928			P.II	I Small Molecule Metabolism	Putative glycerophosphoryl diester phosphodiesterase	K01126	Q92KH8
SMc02659	relA	CDS	-1.47528	0.000512143			P.II	I.E.1 global regulatory functions	Putative GTP pyrophosphokinase (ATP:GTP 3'-pyrophosphotransferase)	K01139	Q7APE1
SMc02661		CDS	1.48881	0.0009592			P.II	IV.E.2 protein, peptide secretion	Putative toxin secretion ATP-binding ABC transporter	K11004	Q92R30
SMc02682		CDS	-1.5363	0.00544021			P.II	VI.C Hypothetical/Global homology	Conserved hypothetical protein		Q92N76
SMc02686	prs	CDS	-2.54472	0.000512143	-1.27965	0.00354496	P.I	I.D.2 purine ribonucleotide biosynthesis	Probable ribose-phosphate pyrophosphokinase	K00948	Q92N73
SMc02689		CDS			2.03069	0.000512143	P.III	I.I.4 carbon compounds	Probable aldehyde dehydrogenase	K00138	Q92N70
SMc02690		CDS			1.08851	0.00513758	P.III	VI.A Not classified regulator	Putative transcription regulator		Q92K20
SMc02692	rplY	CDS	-2.51346	0.000512143	-1.43435	0.00285916	P.I	III.C.2 ribosomal proteins - synthesis, modification	Putative 5S ribosomal protein L25	K02897	Q92N68
SMc02695	engD	CDS	-1.98152	0.000512143	-0.993771	0.0091608	P.I	II.B.7 proteins and peptides - translation and modification	Putative GTP-dependent nucleic acid-binding protein EngD	K06942	Q92N65
SMc02699		CDS	2.12397	0.00320928			P.II	VI.C Hypothetical/Global homology	Conserved hypothetical protein		Q92N61
SMc02703		CDS	1.2635	0.000512143			P.II	VI.C Hypothetical/Global homology	Conserved hypothetical protein,ATP binding protein	K03924	Q92N57
SMc02707		CDS			-1.80301	0.00176271	P.III	I Small Molecule Metabolism	Putative acetyltransferase		Q92N55
SMc02708		CDS	1.85844	0.000512143	1.54458	0.000512143	P.I	VI.C Hypothetical/Global homology	Conserved hypothetical protein	K07393	Q92N54
SMc02709		CDS			1.24537	0.00137247	P.III	VI.C Hypothetical/Global homology	Hypothetical/unknown protein		Q92N53
SMc02712		CDS	-1.12218	0.00137247			P.II	VI.B Hypothetical/Partial homology	Hypothetical protein		Q92K16
SMc02713	rpoE3	CDS	-1.19224	0.0009592			P.II	II.B.6 RNA synthesis, modification , DNA transcription	RNA polymerase sigma-E factor (sigma-24)	K03088	Q92N51
SMc02717	leuA1	CDS	-1.70713	0.000512143	-1.90079	0.000512143	P.I	I.A.1 leucine	2-isopropylmalate synthase	K01649	Q9X7L2
SMc02718		CDS	-3.73782	0.000512143	-2.36145	0.000512143	P.I	VI.B Hypothetical/Partial homology	Hypothetical/unknown protein		Q92N49
SMc02720	clpP2	CDS	-1.67644	0.000512143			P.II	II.A.4 degradation of proteins, peptides, glycopeptides	CLP protease proteolytic subunit	K01358	Q9X7L1
SMc02725	trpE	CDS	-2.46285	0.000512143	-1.08194	0.00805017	P.I	I.A.6 tryptophan	Anthranilate synthase includes: glutamine amidotransferase	K13503	P15395
SMc02729		CDS			1.10096	0.0009592	P.III	VI.C Hypothetical/Global homology	Conserved hypothetical transmembrane protein,signal peptide		Q92K14
SMc02737	choX	CDS			1.69128	0.000512143	P.III	IV.D.2 amino acids, amines, peptides	Putative choline ABC transporter,periplasmic solute-binding component	K02002	Q92N37
SMc02755	ahcY	CDS	-2.01372	0.000512143	-2.04057	0.000512143	P.I	I.F.14 amino acids	Probable adenosylhomocysteinase	K01251	Q92TC1
SMc02757		CDS	-1.49015	0.000512143			P.II	VI.B Hypothetical/Partial homology	Hypothetical protein	K07102	Q92KV3
SMc02758		CDS	-1.71388	0.000512143			P.II	VI.C Hypothetical/Global homology	Putative nucleotidyl transferase	K00992	Q92TC3
SMc02759		CDS	-1.91278	0.000512143			P.II	VI.B Hypothetical/Partial homology	Hypothetical protein	K16899	Q92KV4
SMc02760		CDS	-1.48212	0.0091608			P.II	II.B.8 DNA - replication, repair, restr./modif.	ATP-dependent nuclease / helicase	K16898	Q92TC4
SMc02765	trpA	CDS	-1.39709	0.000512143			P.II	I.A.6 tryptophan	Probable tryptophan synthase alpha chain	K01695	Q92TC8
SMc02766	trpB	CDS	-1.71627	0.000512143			P.II	I.A.6 tryptophan	Probable tryptophan synthase beta chain	K01696	Q92TC9
SMc02767	trpF	CDS	-1.36522	0.000512143			P.II	I.A.6 tryptophan	Probable N-5'-phosphoribosylanthranilate isomerase	K01817	Q92TD0
SMc02769		CDS	2.74723	0.000512143	2.34018	0.000512143	P.I	VI.C Hypothetical/Global homology	Conserved hypothetical transmembrane protein		Q92TD2
SMc02770	phaZ	CDS	1.69964	0.000512143	2.8031	0.000512143	P.I	I.I.4 carbon compounds	Intracellular PHB depolymerase	K05973	Q92TD3
SMc02774		CDS	-1.08073	0.00387636			P.II	IV.D.3 carbohydrates, organic acids, alcohols	Putative D-fucose,pyruvic acid or L-fucose ABC transporter,periplasmic substrate-binding component	K10439	Q92TD7
SMc02778	hpcH	CDS			2.13138	0.000512143	P.III	I.I.4 carbon compounds	2,4-dihydroxyhept-2-ene-1,7-dioic acid aldolase	K02510	Q92TE1
SMc02781		CDS	-1.34733	0.000512143			P.II	I Small Molecule Metabolism	Putative NADH dehydrogenase/NAD		Q92TE3
SMc02782	gyrB	CDS	-2.13573	0.000512143			P.II	II.B.8 DNA - replication, repair, restr./modif.	Probable DNA gyrase subunit B	K02470	Q92TE4
SMc02786		CDS	1.27674	0.0009592			P.II	IV.E Transport of large molecules	Import inner membrane translocase subunit TIM44		Q92TE6
SMc02793		CDS			1.00223	0.00970149	P.III	VI.C Hypothetical/Global homology	Conserved hypothetical protein	K09773	Q92TF2
SMc02794	hemE	CDS	-2.48748	0.000512143			P.II	I.B.4 heme, porphyrin	Probable uroporphyrinogen decarboxylase	K01599	Q92KV8
SMc02795		CDS	-1.43705	0.000512143			P.II	VI.C Hypothetical/Global homology	Hypothetical transmembrane protein	K08973	Q92KV9
SMc02796	rho	CDS	-1.53281	0.000512143			P.II	II.B.6 RNA synthesis, modification , DNA transcription	Probable transcription termination factor Rho protein	K03628	Q92KW0
SMc02797	mnmE	CDS	-1.73445	0.000512143			P.II	II.D.1 amino acyl tRNA synthesis; tRNA modification	Probable tRNA modification GTPase	K03650	Q92KW1
SMc02798	mnmG	CDS	-1.73001	0.000512143			P.II	II.D.1 amino acyl tRNA synthesis; tRNA modification	Probable tRNA uridine 5-carboxymethylaminomethyl modification enzyme	K03495	Q92KW2
SMc02801	parB	CDS	-1.40049	0.00861167			P.II	IV.A Cell division	Probable chromosome partitioning protein ParB	K03497	Q92KW5
SMc02804	leuS	CDS	-2.19469	0.000512143			P.II	II.D.1 amino acyl tRNA synthesis; tRNA modification	Probable leucyl-tRNA synthetase	K01869	Q92KW8
SMc02820	cpaF1	CDS	-2.31807	0.000512143			P.II	III.A.2 surface structures	Putative pilus assembly protein	K02283	Q92T39
SMc02822		CDS	-1.629	0.0009592			P.II	VI.C Hypothetical/Global similarity	Hypothetical transmembrane protein	K12511	Q92T37
SMc02828		CDS	-1.07101	0.00452512			P.II	I Small Molecule Metabolism	NAD-dependent dehydrogenase	K12972	Q92T34
SMc02829		CDS	-1.9964	0.00420562			P.II	IV.D.2 amino acids, amines, peptides	Putative taurine,valine,isoleucine and leucine ABC transporter,ATP-binding component	K13896	Q92T33
SMc02832		CDS	1.06678	0.00602255			P.II	IV.D.2 amino acids, amines, peptides	Putative taurine,valine,isoleucine and leucine ABC transporter,periplasmic solute-binding component	K13893	Q92T30
SMc02833	mepA	CDS	1.1814	0.00544021			P.II	III.B.3 murein sacculus, peptidoglycan	Putative murein endopeptidase transmembrane protein	K07261	Q92T29
SMc02834	mgsA	CDS	-1.56524	0.00720208			P.II	I.F.18 pool of unassigned individual reversibles reactions	Probable methylglyoxal synthase	K01734	Q92T28
SMc02835	glk	CDS	-1.71537	0.000512143			P.II	I.H.8 glycolysis	Probable glucokinase transmembrane protein	K00845	Q92T27
SMc02836		CDS	-1.90637	0.000512143	-1.03378	0.00832418	P.I	IV.D Transport of small molecules	ABC transporter,ATP-binding and permease components	K11085	Q92T26
SMc02837	dapB	CDS	-1.41053	0.000512143			P.II	I.A.13 lysine	Probable dihydrodipicolinate reductase	K00215	P58326
SMc02845		CDS	-1.53945	0.000512143			P.II	IV.G.2 drug/analog sensitivity and resistance	Putative resistance protein		Q92T18
SMc02854		CDS	2.29471	0.000512143			P.II	VI.C Hypothetical/Global similarity	Hypothetical signal peptide protein		Q92T10
SMc02855		CDS			1.85373	0.000512143	P.III	VI.C Hypothetical/Global homology	aR14 Hypothetical transmembrane protein		Q92T09
SMc02857	dnaK	CDS	-1.886	0.000512143			P.II	IV.B Chaperoning	Heat shock protein 7 (HSP7) chaperone		P42374
SMc02858	dnaJ	CDS	-1.23251	0.0009592			P.II	IV.B Chaperoning	Probable chaperone protein	K03686	Q92T07
SMc02859		CDS	-1.65966	0.000512143	-1.09847	0.00889017	P.I	VI.B Hypothetical/Partial homology	Hypothetical transmembrane protein		Q92KU0
SMc02861	pit1	CDS	-2.983	0.000512143	-4.25166	0.000512143	P.I	IV.D.1 anions	Phosphate transport transmembrane protein	K03306	O30499
SMc02862		CDS	-5.29538	0.000512143	-4.88585	0.000512143	P.I	IV.D.1 anions	Putative pit accessory protein	K07220	O30498
SMc02863	recF	CDS	-1.80547	0.00387636			P.II	II.B.8 DNA - replication, repair, restr./modif.	DNA repair protein	K03629	P56903
SMc02866		CDS	-1.55937	0.000512143			P.II	VI.A Not classified regulator	Putative transcriptional regulator	K03577	Q92T04
SMc02867		CDS	-1.91247	0.000512143	-1.17991	0.00285916	P.I	IV.G.2 drug/analog sensitivity and resistance	Putative multidrug-efflux system transmembrane protein	K18138	Q92T03
SMc02868		CDS	-1.27885	0.00176271			P.II	IV.G.2 drug/analog sensitivity and resistance	Putative multidrug efflux system	K03585	Q92T02
SMc02869		CDS	-1.37724	0.000512143			P.II	IV.D.3 carbohydrates, organic acids, alcohols	Putative ATP-binding ABC transporter	K10111	Q92T01
SMc02871		CDS	-2.21738	0.00995897			P.II	IV.D Transport of small molecules	Putative ABC transporter	K10119	Q92SZ9
SMc02872		CDS	-1.6409	0.000512143			P.II	IV.D Transport of small molecules	Probable ABC transporter	K10118	Q92SZ8
SMc02873		CDS	-1.36105	0.0009592			P.II	IV.D Transport of small molecules	Probable ABC transporter	K10117	Q92SZ7
SMc02874		CDS	-1.67247	0.000512143			P.II	VI.C Hypothetical/Global homology	Conserved hypothetical protein	K07106	Q92SZ6
SMc02885	msrA1	CDS			1.03718	0.00285916	P.III	II.B.7 proteins and peptides - translation and modification	Probable peptide methionine sulfoxide reductase	K07304	Q92SY7
SMc02888		CDS			-1.31702	0.00452512	P.III	VI.A Not classified regulator	Putative transcription regulator		Q92SY5
SMc02892		CDS	1.99771	0.00354496			P.II	IV.D Transport of small molecules	Putative transport protein		Q92SY1
SMc02896	ilvE1	CDS	-1.97768	0.000512143			P.II	I.A.2 isoleucine/valine	Probable branched-chain amino acid aminotransferase	K00826	Q92SX8
SMc02897		CDS	-2.27146	0.000512143			P.II	I.G.1 electron transport	Putative cytochrome C transmembrane protein	K08738	Q92SX7
SMc02898	kdsB	CDS	-1.70484	0.000512143			P.II	III.A.1 surface polysaccharides/antigens	Probable 3-deoxy-manno-octulosonate cytidylyltransferase (CMP-KDO synthetase)	K00979	Q92SX6
SMc02899	pheA	CDS	-1.33998	0.000512143			P.II	I.A.8 phenylalanine	Putative prephenate dehydratase	K04518	Q92SX5
SMc02900		CDS	-4.40363	0.000512143	-1.34085	0.00573901	P.I	VI.C Hypothetical/Global homology	Conserved hypothetical protein		Q92SX4
SMc02901		CDS	-2.94887	0.000512143			P.II	VI.B Hypothetical/Partial homology	Hypothetical protein		Q92KT5
SMc02904		CDS			1.18044	0.0009592	P.III	VI.B Hypothetical/Partial homology	Hypothetical protein		Q92KT3
SMc02908	recR	CDS	-1.64944	0.000512143			P.II	I.B.8 DNA - replication, repair, restr./modif.	Probable recombination protein	K06187	Q92SW9
SMc02909	mltB1	CDS	-1.03872	0.00602255			P.II	I.A.3 degradation of polysaccharides	Membrane-bound lytic murein transglycosylase B		Q92SW8
SMc02910		CDS			1.31485	0.000512143	P.III	IV.D Transport of small molecules	Probable MFS permease		Q92SW7
SMc02911		CDS	-2.74454	0.000512143	-1.76863	0.000512143	P.I	VI.C Hypothetical/Global homology	Conserved hypothetical protein	K09748	Q92SW6
SMc02912	nusA	CDS	-2.30519	0.000512143	-1.65227	0.000512143	P.I	II.B.6 RNA synthesis, modification , DNA transcription	Probable N utilization substance protein A	K02600	Q92SW5
SMc02913		CDS	-1.43956	0.000512143			P.II	VI.C Hypothetical/Global similarity	Hypothetical protein	K07742	Q92KT2
SMc02914	infB	CDS	-1.83125	0.000512143			P.II	II.B.6 RNA synthesis, modification , DNA transcription	Probable translation initiation factor IF-2 protein	K02519	Q92SW4
SMc02915					-1.29642	0.0069235	P.III	tRNA	Ser_gga	K14233
SMc02941		CDS			1.23512	0.00320928	P.III	VI.C Hypothetical/Global homology	Conserved hypothetical transmembrane protein,signal peptide		Q92JY2
SMc02942	pal	CDS	-1.29491	0.0009592			P.II	III.B.2 membrane, outer	Peptidoglycan-associated lipoprotein	K03640	Q926C3
SMc02975	pckR	CDS	-1.0417	0.00602255			P.II	I.F.13 gluconeogenesis	Putative phosphoenolpyruvate carboxykinase regulator transcription regulator		Q7APB5
SMc02976		CDS			1.11855	0.00354496	P.III	VI.A Not classified regulator	Transcription regulator MarR family		Q92LZ3
SMc03004	icpA,mcpE	CDS	-1.60241	0.00250247	-1.89944	0.000512143	P.I	IV.C Mobility chemotaxis	IcpA/McpE internal chemotaxis protein	K03406	Q52877
SMc03005		CDS	-1.90827	0.000512143	-1.81373	0.000512143	P.I	VI.C Hypothetical/Global homology	Conserved hypothetical protein,required for motility,contains an anti-anti-sigma domain	K03409	Q92S05
SMc03006	cheY1	CDS	-1.96539	0.000512143	-2.0494	0.000512143	P.I	IV.C Mobility chemotaxis	Chemotaxis regulator protein	K03413	Q7APF3
SMc03007	cheA	CDS	-2.42989	0.000512143	-2.27104	0.000512143	P.I	IV.C Mobility chemotaxis	Chemotaxis protein (sensory transduction histidine kinase)	K03407	Q52880
SMc03009	cheR	CDS			-2.72551	0.00176271	P.III	IV.C Mobility chemotaxis	Chemotaxis protein methyltransferase	K00575	Q7APF2
SMc03013		CDS	-1.94826	0.000512143	-1.52108	0.000512143	P.I	VI.C Hypothetical/Global homology	Conserved hypothetical protein		Q92S03
SMc03014	fliF	CDS	-2.08925	0.000512143	-1.35655	0.00137247	P.I	IV.C Mobility chemotaxis	Flagellar M-ring transmembrane protein	K02409	O54239
SMc03019	fliG	CDS	-2.93202	0.000512143	-1.68456	0.000512143	P.I	IV.C Mobility chemotaxis	Flagellar motor switch protein	K02410	O54244
SMc03020	fliN	CDS	-1.82856	0.000512143	-1.6847	0.000512143	P.I	IV.C Mobility chemotaxis	Flagellar motor switch protein	K02417	O54245
SMc03021	fliM	CDS	-2.6231	0.000512143	-2.29126	0.000512143	P.I	IV.C Mobility chemotaxis	Flagellar motor switch transmembrane protein	K02416	O54246
SMc03022	motA	CDS	-2.0628	0.000512143	-2.18416	0.000512143	P.I	IV.C Mobility chemotaxis	Chemotaxis (motility protein A) transmembrane	K02556	P97215
SMc03023		CDS	-2.02169	0.000512143	-1.72625	0.000512143	P.I	VI.C Hypothetical/Global homology	Conserved hypothetical protein		Q92S00
SMc03024	flgF	CDS	-2.75686	0.000512143	-1.58759	0.000512143	P.I	IV.C Mobility chemotaxis	Flagellar basal-body rod protein	K02391	O54248
SMc03025	fliI	CDS			-1.66749	0.00213505	P.III	IV.C Mobility chemotaxis	Flagellum-specific ATP synthase	K02412	O54249
SMc03027	flgB	CDS	-2.86029	0.000512143	-1.91637	0.000512143	P.I	IV.C Mobility chemotaxis	Flagellar basal-body rod protein	K02387	Q7APE9
SMc03028	flgC	CDS			-1.8052	0.000512143	P.III	IV.C Mobility chemotaxis	Flagellar basal-body rod protein	K02388	Q52944
SMc03030	flgG	CDS	-1.98366	0.000512143	-1.72265	0.000512143	P.I	IV.C Mobility chemotaxis	Flagellar basal-body rod protein	K02392	Q52946
SMc03035	fliL	CDS	-1.92631	0.000512143	-1.27617	0.000512143	P.I	IV.C Mobility chemotaxis	Flagellar transmembrane protein	K02415	Q92RZ7
SMc03036	fliP	CDS	-2.03423	0.000512143	-1.4232	0.000512143	P.I	IV.C Mobility chemotaxis	Flagellar biosynthetic transmembrane protein	K02419	P37827
SMc03037	flaA	CDS			-2.23284	0.000512143	P.III	IV.C Mobility chemotaxis	Flagellin A	K02406	Q03841
SMc03038	flaB	CDS	-2.2205	0.00544021	-2.18869	0.000512143	P.I	IV.C Mobility chemotaxis	Flagellin B	K02406	Q03842
SMc03039	flaD	CDS	-3.02793	0.000512143	-1.5885	0.000512143	P.I	IV.C Mobility chemotaxis	Flagellin D	K02406	P58330
SMc03041		CDS			-1.58625	0.00889017	P.III	VI.C Hypothetical/Global homology	Conserved hypothetical protein,required for flagellum formation		Q92KN1
SMc03042	motB	CDS	-1.98031	0.00354496			P.II	IV.C Mobility chemotaxis	Chemotaxis (motility protein B) transmembrane	K02557	Q92RZ6
SMc03044	fliK	CDS	-2.12192	0.00137247			P.II	IV.C Mobility chemotaxis	FliK hook length control protein	K10565	Q92RZ5
SMc03047	flgE	CDS	-1.99566	0.0009592	-1.50692	0.000512143	P.I	IV.C Mobility chemotaxis	Flagellar hook protein	K02390	Q9X5Y0
SMc03048	flgK	CDS	-1.96477	0.00137247	-1.84634	0.000512143	P.I	IV.C Mobility chemotaxis	Putative flagellar hook-associated protein	K02396	Q92RZ2
SMc03049	flgL	CDS	-2.07632	0.000512143	-1.74847	0.000512143	P.I	IV.C Mobility chemotaxis	Putative flagellar hook-associated protein	K02397	Q92RZ1
SMc03054	flhA	CDS	-2.93006	0.000512143	-1.89637	0.000512143	P.I	IV.C Mobility chemotaxis	Probable flagellar biosynthesis transmembrane protein	K02400	Q92RY9
SMc03061	aglE	CDS	-1.26835	0.0009592			P.II	IV.D.3 carbohydrates, organic acids, alcohols	Alpha-glucosides ABC transporter,periplasmic substrate-binding component	K10232	Q9Z3R5
SMc03062	aglF	CDS	-1.90081	0.000512143	-1.55409	0.000512143	P.I	IV.D.3 carbohydrates, organic acids, alcohols	Alpha-glucosides ABC transporter,permease component	K10233	Q9Z3R6
SMc03064	aglA	CDS	-2.89115	0.000512143	-1.7282	0.000512143	P.I	I.I.4 carbon compounds	Probable alpha-glucosidase	K01187	Q9Z3R8
SMc03065	aglK	CDS	-2.37418	0.000512143	-1.21646	0.00250247	P.I	IV.D.3 carbohydrates, organic acids, alcohols	Alpha-glucosides ABC transporter,ATP binding component	K10235	Q9Z3R9
SMc03066		CDS	-2.14766	0.000512143	-1.00801	0.00720208	P.I	VI.C Hypothetical/Global homology	Conserved hypothetical protein		Q92RY2
SMc03069	pgl	CDS	-1.49436	0.000512143			P.II	I.F.16 Entner-Doudoroff	6-phosphogluconolactonase	K01057	Q9Z3S1
SMc03070	zwf	CDS	-1.45066	0.000512143			P.II	I.F.16 Entner-Doudoroff	Glucose-6-phosphate 1-dehydrogenase	K00036	Q9Z3S2
SMc03071		CDS	-2.20008	0.000512143	-1.75073	0.000512143	P.I	IV.C Mobility chemotaxis	Hypothetical protein	K02395	Q92RY7
SMc03085	fdhD	CDS	-1.08148	0.00661481			P.II	I.F Central intermediary metabolism	Putative formate dehydrogenase associated protein	K02379	Q7APA8
SMc03090	cheW3	CDS	-1.65541	0.000512143			P.II	IV.C Mobility chemotaxis	Putative chemotaxis protein	K03408	Q92LN3
SMc03091	argI1	CDS	-1.91444	0.000512143			P.II	I.I.3 amino acids	Probable arginase	K01476	Q92LN4
SMc03099	cyaF1	CDS			1.31233	0.000512143	P.III	I.E.1 global regulatory functions	Putative adenylate cyclase	K01768	Q92LP1
SMc03100		CDS	3.45034	0.000512143			P.II	VI.C Hypothetical/Global similarity	Hypothetical protein signal peptide		Q92LP2
SMc03101		CDS			1.48447	0.000512143	P.III	I.I.4 carbon compounds	Putative carbon monoxide dehydrogenase small subunit	K03518	Q92LP3
SMc03102		CDS			1.39299	0.000512143	P.III	I.I.4 carbon compounds	Putative carbon monoxide dehydrogenase large subunit transmembrane protein	K03520	Q92LP4
SMc03103		CDS			1.21357	0.00285916	P.III	I.I.4 carbon compounds	Putative carbon monoxide dehydrogenase medium subunit transmembrane protein	K03519	Q92LP5
SMc03104	hemA	CDS	-1.62272	0.000512143			P.II	I.B.4 heme, porphyrin	Probable 5-aminolevulinic acid synthase (delta-aminolevulinate synthase) (delta-ALA synthetase)	K00643	P08080
SMc03105	dxr	CDS	-1.82508	0.000512143			P.II	I Small Molecule Metabolism	Probable 1-deoxy-D-xylulose 5-phosphate reductoisomerase	K00099	Q92LP6
SMc03108		CDS	3.20282	0.000512143			P.II	VI.C Hypothetical/Global homology	Calcium-binding protein		Q92LP8
SMc03109	mak	CDS	-1.68046	0.000512143			P.II	I.I.4 carbon compounds	Putative fructokinase	K00847	Q92LP9
SMc03112	metH	CDS	-2.83276	0.000512143	-3.22692	0.000512143	P.I	I.A.12 methionine	Probable 5-methyltetrahydrofolate--homocysteine methyltransferase (methionine synthase,vitamin-B12 dependent isozyme) protein	K00548	Q92LQ0
SMc03121		CDS	1.03928	0.00777209	1.82305	0.000512143	P.I	IV.D.2 amino acids, amines, peptides	Putative methionine ABC transporter,periplasmic solute-binding component	K01999	Q92LQ8
SMc03124		CDS	8.70055	0.000512143	8.93199	0.000512143	P.I	IV.D.2 amino acids, amines, peptides	Putative arginine ABC transporter,periplasmic solute-binding component	K02035	Q92LR1
SMc03125		CDS	7.89821	0.000512143	8.90126	0.000512143	P.I	IV.D.2 amino acids, amines, peptides	Putative arginine ABC transporter,ATP-binding component	K02031	Q92LR2
SMc03126		CDS	6.63693	0.000512143	8.219	0.000512143	P.I	IV.D.2 amino acids, amines, peptides	Putative arginine ABC transporter,ATP-binding component	K02032	Q92LR3
SMc03128		CDS	6.75441	0.000512143	7.53562	0.000512143	P.I	IV.D.2 amino acids, amines, peptides	Putative amino acid ABC transporter,permease component	K02034	Q92LR5
SMc03129		CDS	6.46179	0.000512143	7.84606	0.000512143	P.I	VI.C Hypothetical/Global homology	Conserved hypothetical protein	K01126	Q92LR6
SMc03130		CDS	5.55107	0.000512143	7.06964	0.000512143	P.I	VI.C Hypothetical/Global homology	Conserved hypothetical protein		Q92LR7
SMc03131		CDS	-1.34441	0.0009592			P.II	IV.D.2 amino acids, amines, peptides	Putative DL-2-aminoadipic acid ABC transporter,periplasmic solute-binding component	K02030	Q92LR8
SMc03132		CDS	-1.32935	0.000512143	-1.11897	0.00387636	P.I	I Small Molecule Metabolism	Oxidoreductase	K09471	Q92LR9
SMc03138		CDS			-2.05833	0.000512143	P.III	I.I.4 carbon compounds	Sugar kinase	K10710	Q92LS4
SMc03139		CDS	-1.9504	0.000512143	-2.391	0.000512143	P.I	I.I.4 carbon compounds	Putative sugar isomerase	K19510	Q92LS5
SMc03143		CDS	-3.35005	0.000512143	-2.44201	0.000512143	P.I	VI.B Hypothetical/Partial homology	Hypothetical protein		Q92JV8
SMc03147		CDS			1.46577	0.00285916	P.III	IV.E.2 protein, peptide secretion	Putative ATP-binding ABC transporter	K12536	Q92LS9
SMc03154		CDS	2.32302	0.000512143	2.41335	0.000512143	P.I	VI.C Hypothetical/Global homology	Conserved hypothetical protein		Q92LX7
SMc03155		CDS	2.58583	0.000512143	2.9944	0.000512143	P.I	VI.B Hypothetical/Partial homology	Hypothetical protein		Q92JW4
SMc03157	metQ	CDS	-2.80272	0.000512143	-2.54672	0.000512143	P.I	IV.D.2 amino acids, amines, peptides	Probable D-methionine-binding lipoprotein MetQ	K02073	Q92LX5
SMc03159	metN	CDS			-2.38792	0.00632638	P.III	IV.D.2 amino acids, amines, peptides	Methionine import ATP-binding protein MetN	K02071	Q92LX3
SMc03160		CDS	-1.5246	0.00513758			P.II	I.I.4 carbon compounds	Probable beta-glucosidase	K05350	Q92LX2
SMc03163	xylA	CDS	-1.08428	0.00387636			P.II	I.I.4 carbon compounds	Probable xylose isomerase	K01805	Q92LW9
SMc03166		CDS	1.69324	0.000512143	1.99511	0.00213505	P.I	VI.C Hypothetical/Global homology	Conserved hypothetical transmembrane protein		Q92LW6
SMc03167	emrB	CDS			1.8443	0.000512143	P.III	IV.D Transport of small molecules	MFS-type transport protein	K03446	Q92LW5
SMc03168	emrA	CDS			1.09899	0.00544021	P.III	IV.G.2 drug/analog sensitivity and resistance	Multidrug resistance efflux system	K03543	Q92LW4
SMc03169		CDS			1.38184	0.000512143	P.III	VI.A Not classified regulator	Transcription regulator TetR family		Q92LW3
SMc03170		CDS			1.28178	0.0009592	P.III	VI.A Not classified regulator	Transcription regulator AraC family	K13653	Q92LW2
SMc03172	gltX	CDS	-2.29588	0.000512143	-1.3896	0.000512143	P.I	II.D.1 amino acyl tRNA synthesis; tRNA modification	Glutamyl-tRNA synthetase	K01885	P15189
SMc03173	lysS	CDS	-2.11865	0.000512143	-1.10083	0.0069235	P.I	II.D.1 amino acyl tRNA synthesis; tRNA modification	Lysyl-tRNA synthetase	K04567	O87821
SMc03175		CDS	-1.87187	0.000512143			P.II	I.F.1 salvage of nucleosides and nucleotides	Inosine-uridine preferring nucleoside hydrolase family protein		Q92LV9
SMc03178		CDS	-1.65114	0.000512143	-1.10199	0.00387636	P.I	VI.A Not classified regulator	Diguanylate cyclase/phosphodiesterase		Q92JW2
SMc03195	ung	CDS			2.26064	0.000512143	P.III	II.B.8 DNA - replication, repair, restr./modif.	Probable uracil-DNA glycosylase	K03648	Q92LU5
SMc03196	modA	CDS	-1.31651	0.00285916	1.77145	0.000512143	P.I	IV.D.1 anions	Putative molybdate-binding periplasmic ABC transporter	K02020	Q92LU4
SMc03197	modB	CDS			1.58383	0.00661481	P.III	IV.D.1 anions	Putative molybdenum transport system permease ABC transporter	K02018	Q92LU3
SMc03199		CDS	-1.61349	0.000512143			P.II	IV.D.1 anions	Putative molybdenum transport associated protein	K02019	Q92LU1
SMc03201	bkdAa	CDS	-1.35982	0.0009592	1.07632	0.00970149	P.I	I.I.3 Amino Acids	Probable 2-oxoisovalerate dehydrogenase alpha subunit	K00166	Q92LT9
SMc03208	hmgA	CDS	1.31339	0.00995897			P.II	I.I.3 amino acids	Homogentisate 1,2-dioxygenase	K00451	Q9X4F5
SMc03225		CDS			1.8474	0.000512143	P.III	VI.B Hypothetical/Partial homology	Hypothetical/unknown protein		Q92JU3
SMc03226		CDS	-1.19889	0.000512143			P.II	VI.B Hypothetical/Partial homology	Hypothetical protein		Q92JU2
SMc03229	gpsA	CDS	-1.0802	0.00354496			P.II	I.F.11 misc. glycerol metabolism	Probable glycerol-3-phosphate dehydrogenase [NAD(P)+]	K00057	Q9R9L6
SMc03230	gcp	CDS	-1.41812	0.00602255			P.II	II.A.4 degradation of proteins, peptides, glycopeptides	Probable O-sialoglycoprotein endopeptidase	K01409	Q92LH8
SMc03232	hemD	CDS	-1.53852	0.000512143			P.II	I.B.4 heme, porphyrin	Putative uroporphyrinogen-III synthase	K01719	Q92LH6
SMc03233		CDS			1.51658	0.000512143	P.III	VI.B Hypothetical/Partial homology	Hypothetical transmembrane protein		Q92JU1
SMc03234		CDS			1.38959	0.000512143	P.III	VI.C Hypothetical/Global homology	Conserved hypothetical transmembrane protein,signal peptide,may be involved in a late step of protoheme IX synthesis	K02498	Q92JU0
SMc03242	typA	CDS			1.28458	0.00573901	P.III	VI.A Not classified regulator	Predicted membrane GTPase	K06207	Q92LG8
SMc03243		CDS	8.5039	0.000512143	9.12274	0.000512143	P.I	I.F.20 phosphorous metabolism	Putative alkaline phosphatase transmembrane protein	K01113	Q92LG7
SMc03251		CDS	-3.4514	0.000512143	-1.83214	0.00387636	P.I	VI.C Hypothetical/Global homology	Conserved hypothetical protein		Q92JT6
SMc03252	proB2	CDS	-5.77112	0.000512143	-4.95752	0.000512143	P.I	I.A.16 proline	Putative glutamate 5-kinase	K00931	Q92LF7
SMc03298	TRm26.3	CDS	-2.33905	0.000512143			P.II	V. elements of external origin	Putative transposase number 3 for insertion sequence ISRm26	K07484	Q92LC7
SMc03746		CDS	-2.0168	0.00861167			P.II	VI.C Hypothetical/Global homology	Hypothetical/unknown protein		Q92LG5
SMc03761		CDS	-1.83518	0.000512143			P.II	II.B Macromolecule synthesis, modification	Putative DNA/RNA helicase	K06877	Q92JT3
SMc03763		CDS	-1.52189	0.000512143			P.II	II.B.8 DNA - replication, repair, restr./modif.	Putative cytosine-specific methyltransferase	K00558	Q92LC3
SMc03768		CDS	1.07985	0.00661481			P.II	VI.B Hypothetical/Partial homology	Hypothetical transmembrane protein		Q92JT1
SMc03770	rplU	CDS	-1.8585	0.000512143			P.II	III.C.2 ribosomal proteins - synthesis, modification	Probable 5S ribosomal protein L21	K02888	Q92LB8
SMc03772	rpmA	CDS	-1.61484	0.000512143			P.II	III.C.2 ribosomal proteins - synthesis, modification	Probable 5S ribosomal protein L27	K02899	Q92LB7
SMc03773		CDS	-3.85265	0.000512143	-1.44132	0.00632638	P.I	I Small Molecule Metabolism	Putative acetyltransferase		Q92LB6
SMc03774		CDS	-2.34635	0.00285916			P.II	I Small Molecule Metabolism	Putative acetyltransferase	K03790	Q92LB5
SMc03775	cgtA	CDS	-1.93566	0.000512143			P.II	VI.C Hypothetical/Global homology	Putative GTP-binding protein	K03979	Q92LB4
SMc03778	nadD	CDS	-1.66879	0.000512143			P.II	I.B.9 pyridine nucleotide	Nicotinate-nucleotide adenylyltransferase	K00969	Q92LB1
SMc03780		CDS	2.44582	0.000512143	3.41639	0.000512143	P.I	VI.C Hypothetical/Global homology	Conserved hypothetical protein	K09710	Q92JT0
SMc03781		CDS	2.71878	0.000512143	3.2099	0.000512143	P.I	VI.C Hypothetical/Global homology	Conserved hypothetical protein	K00783	Q92LB0
SMc03786	bfr	CDS			1.76471	0.000512143	P.III	IV.F Adaptation	Probable bacterioferritin (Bfr) (cytochrome B-1) (cytochrome B-557) protein	K03594	Q92LA7
SMc03795	leuD	CDS	-1.76423	0.000512143			P.II	I.A.1 leucine	Probable 3-isopropylmalate dehydratase small subunit	K01704	Q92LA1
SMc03796		CDS	-2.07632	0.000512143			P.II	VI.C Hypothetical/Global homology	Conserved hypothetical protein		Q92LA0
SMc03797	metA	CDS	-1.55912	0.000512143	-1.44889	0.000512143	P.I	I.A.12 methionine	Probable homoserine O-succinyltransferase	K00651	Q92L99
SMc03799		CDS	1.78297	0.00137247			P.II	VI.C Hypothetical/Global homology	Conserved hypothetical protein		Q92L97
SMc03805	tesB	CDS			1.15467	0.00420562	P.III	I.C Fatty acid biosynthesis	Probable acyl-CoA thioesterase II	K10805	Q92L92
SMc03806	glnK	CDS			-6.32784	0.000512143	P.III	I.F.5 nitrogen metabolism	Probable nitrogen regulatory protein PII 2	K04752	Q92L91
SMc03807	amtB	CDS			-6.84138	0.000512143	P.III	I.F.5 nitrogen metabolism	Probable ammonium transporter	K03320	Q92L90
SMc03818	xthA3	CDS	-2.46498	0.000512143			P.II	II.A.1 degradation of DNA	Putative exodeoxyribonuclease III	K01142	Q92L80
SMc03819		CDS	-1.92902	0.0009592			P.II	VI.C Hypothetical/Global homology	Conserved hypothetical protein		Q92L79
SMc03822		CDS			1.3155	0.00661481	P.III	VI.C Hypothetical/Global homology	Conserved hypothetical protein	K08296	Q92L77
SMc03823	leuC	CDS	-2.81917	0.000512143	-1.95438	0.000512143	P.I	I.A.1 leucine	Probable 3-isopropylmalate dehydratase large subunit	K01703	Q92L76
SMc03826	argG	CDS	-2.09095	0.000512143	-1.27711	0.00213505	P.I	I.A.17 arginine	Probable argininosuccinate synthase	K01940	Q92L73
SMc03829		CDS	-2.94261	0.000512143	-2.09049	0.000512143	P.I	IV.D Transport of small molecules	Putative transport system permease ABC transporter	K05832	Q92L70
SMc03830		CDS	-2.57123	0.000512143	-1.09885	0.00482954	P.I	VI.C Hypothetical/Global homology	Conserved hypothetical protein	K01989	Q92L69
SMc03831	rlmN	CDS	-2.01783	0.000512143			P.II	III.C.1 ribosomes - maturation and modification	Putative ribosomal RNA large subunit methyltransferase N	K06941	Q92L68
SMc03833		CDS	1.31305	0.00354496	1.37228	0.00285916	P.I	VI.C Hypothetical/Global homology	Conserved hypothetical protein		Q92JS2
SMc03834	pcbD	CDS	1.65346	0.000512143	1.7754	0.000512143	P.I	I.B Biosynthesis of cofactors, carriers	Putative pterin-4-alpha-carbinolamine dehydratase	K01724	Q92L66
SMc03839		CDS			1.90901	0.000512143	P.III	VI.C Hypothetical/Global homology	Hypothetical transmembrane protein	K06890	Q92L61
SMc03845		CDS	1.50208	0.000512143			P.II	VI.C Hypothetical/Global homology	Conserved hypothetical protein		Q92JS1
SMc03854	ftsY	CDS	-1.31672	0.000512143			P.II	IV.A Cell division	Putative cell division protein	K03110	Q92L48
SMc03855		CDS	-1.5989	0.00970149			P.II	VI.C Hypothetical/Global homology	Conserved hypothetical protein	K18707	Q92L47
SMc03856	dapF	CDS	-1.79492	0.0009592			P.II	I.A.13 lysine	Probable diaminopimelate epimerase	K01778	Q92L46
SMc03857	ffh	CDS	-3.14359	0.000512143	-3.15666	0.000512143	P.I	IV.E.2 protein, peptide secretion	Probable signal recognition particle protein (fifty-four homolog)	K03106	Q92L45
SMc03858	pheAa	CDS	-3.75535	0.000512143	-2.99945	0.000512143	P.I	I.A Amino acid biosynthesis	Putative chorismate mutase	K04092	Q92L44
SMc03859	rpsP	CDS	-3.61374	0.000512143	-3.4469	0.000512143	P.I	III.C.2 ribosomal proteins - synthesis, modification	Probable 3S ribosomal protein S16	K02959	Q92L43
SMc03860	rimM	CDS	-2.55132	0.000512143	-1.9059	0.000512143	P.I	III.C.1 ribosomes - maturation and modification	Probable 16S rRNA processing protein	K02860	Q92L42
SMc03861	trmD	CDS	-2.29134	0.000512143			P.II	II.D.1 amino acyl tRNA synthesis; tRNA modification	Probable tRNA guanine-N1-methyltransferase	K00554	Q92L41
SMc03863	rplS	CDS	-1.23079	0.00387636			P.II	III.C.2 ribosomal proteins - synthesis, modification	Probable 5S ribosomal protein L19	K02884	Q92L39
SMc03864		CDS	-1.71445	0.000512143			P.II	IV.D.2 amino acids, amines, peptides	Putative amino acid-binding periplasmic (signal peptide) ABC transporter	K02030	Q92L38
SMc03865		CDS	-1.86849	0.000512143	-1.79469	0.000512143	P.I	IV.D.2 amino acids, amines, peptides	Putative amino-acid transport system permease ABC transporter	K02029	Q92L37
SMc03866		CDS	-1.78018	0.000512143	-1.05843	0.00602255	P.I	IV.D.2 amino acids, amines, peptides	Putative ATP-binding ABC transporter	K15738	Q92L36
SMc03867		CDS	-1.24575	0.00749637			P.II	VI.C Hypothetical/Global homology	Conserved hypothetical protein	K00949	Q92L35
SMc03869	thiB	CDS			1.48048	0.00573901	P.III	IV.D Transport of small molecules	Thiamine-binding periplasmic protein precursor	K02064	Q92L33
SMc03873	rpoH2	CDS	2.94588	0.000512143	2.63119	0.000512143	P.I	II.B.6 RNA synthesis, modification, DNA transcription	RNA polymerase sigma factor (Sigma-32)	K03089	G3XCP8
SMc03874		CDS			1.44356	0.0009592	P.III	VI.C Hypothetical/Global homology	Hypothetical protein	K07736	Q92L29
SMc03875		CDS	-1.37068	0.000512143			P.II	I.G.1 electron transport	Putative ferredoxin protein	K05524	Q92L28
SMc03876		CDS	-1.7921	0.000512143	-1.45371	0.0009592	P.I	IV.F Adaptation	Heat shock protein 15 (HSP15).	K04762	Q92L27
SMc03877		CDS	-1.437	0.000512143			P.II	II.B.6 RNA synthesis, modification , DNA transcription	Putative ATP-dependent RNA helicase	K17675	Q92L26
SMc03878	phbB	CDS	1.45593	0.000512143	2.53532	0.000512143	P.I	II.B.5 polysaccharides - (cytoplasmic)	Acetoacetyl-CoA reductase	K00023	P50205
SMc03879	phbA	CDS	1.68553	0.000512143	3.08728	0.000512143	P.I	II.B.5 polysaccharides - (cytoplasmic)	Acetyl-CoA acetyltransferase	K00626	P50174
SMc03881	rpmF	CDS	-2.16718	0.00513758			P.II	III.C.2 ribosomal proteins - synthesis, modification	Probable 5S ribosomal protein L32	K02911	Q92L25
SMc03884	ispA	CDS	-2.2116	0.000512143			P.II	I.B Biosynthesis of cofactors, carriers	Probable geranyltranstransferase	K00795	Q92L22
SMc03885	hisC2	CDS	-1.25257	0.000512143			P.II	I.A.4 histidine	Putative histidinol-phosphate aminotransferase	K00817	Q92L21
SMc03900	ndvA	CDS	4.71434	0.000512143			P.II	IV.D.3 carbohydrates, organic acids, alcohols	Beta-1-->2glucan export ATP-binding protein	K24819	P18767
SMc03901		CDS	1.44309	0.000512143			P.II	VI.B Hypothetical/Partial homology	Hypothetical protein		Q92JR8
SMc03924	glgA1	CDS			1.43736	0.000512143	P.III	II.B.5 polysaccharides - (cytoplasmic)	Probable glycogen synthase (starch [bacterial glycogen] synthase)	K00703	P58393
SMc03925	pgm	CDS			1.5699	0.000512143	P.III	II.B.5 polysaccharides - (cytoplasmic)	Probable phosphoglucomutase (glucose phosphomutase)	K01835	Q92M12
SMc03926	glgX1	CDS			1.40436	0.000512143	P.III	II.B.5 polysaccharides - (cytoplasmic)	Probable glycogen debranching enzyme	K02438	Q92M11
SMc03933	soxB2	CDS			1.08894	0.00137247	P.III	I.I Degradation	Putative sarcosine oxidase subunit B	K00303	Q92M04
SMc03934	rpsU2	CDS	-2.73007	0.000512143			P.II	III.C.2 ribosomal proteins - synthesis, modification	Probable 3S ribosomal protein	K02970	Q92M03
SMc03938	pntB	CDS	-4.15263	0.000512143	-1.16706	0.00285916	P.I	I.F Central intermediary metabolism	Probable NAD(P) transhydrogenase subunit beta transmembrane protein	K00325	Q92LZ9
SMc03939	pntAb	CDS	-2.95726	0.000512143			P.II	I.F Central intermediary metabolism	Probable NAD(P) transhydrogenase subunit alpha part 2 transmembrane protein	K00324	Q92LZ8
SMc03942		CDS			-0.980076	0.00944057	P.III	VI.A Not classified regulator	Diguanylate cyclase/phosphodiesterase		Q92JW6
SMc03950	pntAa	CDS	-3.0831	0.000512143	-1.156	0.00250247	P.I	I.F Central intermediary metabolism	NAD(P) transhydrogenase subunit alpha part 1	K00324	Q92LZ7
SMc03959		CDS			1.36221	0.00970149	P.III	II.B.8 DNA - replication, repair, restr./modif.	Probable ATP-dependent DNA ligase	K01971	Q92M95
SMc03961	sqdB	CDS	3.04035	0.000512143	3.7701	0.000512143	P.I	II.B Macromolecule synthesis, modification	UDP-sulfoquinovose synthase	K06118	Q7APB8
SMc03966	ruvA	CDS	-1.65682	0.000512143	-2.1237	0.000512143	P.I	II.B.8 DNA - replication, repair, restr./modif.	Probable holliday junction DNA helicase	K03550	Q92M91
SMc03967	ruvC	CDS	-2.25631	0.000512143	-1.36723	0.000512143	P.I	II.B.8 DNA - replication, repair, restr./modif.	Probable holliday junction endodeoxyribonuclease	K01159	Q92M90
SMc03968		CDS	-1.87349	0.000512143	-2.29784	0.000512143	P.I	I Small Molecule Metabolism	Oxidoreductase		Q92M89
SMc03969		CDS	-2.60933	0.000512143	-1.66391	0.000512143	P.I	VI.C Hypothetical/Global homology	Conserved hypothetical protein		Q92M88
SMc03970		CDS	2.30935	0.000512143	3.29839	0.000512143	P.I	VI.B Hypothetical/Partial homology	Hypothetical protein		Q92JY0
SMc03971	mexF2	CDS	2.19639	0.000512143	3.33954	0.000512143	P.I	IV.G.2 drug/analog sensitivity and resistance	Probable multidrug-efflux system transmembrane protein	K03296	Q92M87
SMc03972	mexE2	CDS	2.32327	0.000512143	3.29857	0.000512143	P.I	IV.G.2 drug/analog sensitivity and resistance	Putative multidrug efflux system transmembrane protein	K18298	Q92M86
SMc03978	tkt2	CDS	-1.37543	0.00213505			P.II	I.F.19 non oxidative branch, pentose pathway	Probable transketolase	K00615	Q92M82
SMc03983	fbaB	CDS	1.61098	0.000512143			P.II	I.H.8 glycolysis	Probable fructose-bisphosphate aldolase class I	K01623	Q92M78
SMc03985	cyaF2	CDS			1.33268	0.000512143	P.III	I.E.1 global regulatory functions	Probable adenylate/guanylate cyclase	K01768	Q92M76
SMc03994	suhB	CDS	-1.23317	0.0009592			P.II	I Small Molecule Metabolism	Putative inositol monophosphatase	K01092	Q92M71
SMc03999		CDS	3.29015	0.000512143	3.20901	0.000512143	P.I	VI.B Hypothetical/Partial homology	Hypothetical protein		Q92JX3
SMc04003	rpmJ	CDS	-1.59753	0.000512143			P.II	III.C.2 ribosomal proteins - synthesis, modification	Probable 5S ribosomal protein L36	K02919	Q92M65
SMc04007		CDS	-1.41792	0.000512143			P.II	VI.C Hypothetical/Global homology	Conserved hypothetical protein		Q92M61
SMc04016	hss	CDS			1.19704	0.00354496	P.III	I.F.15 polyamine biosynthesis	Probable homospermidine synthase	K00808	Q92M54
SMc04017	omp1	CDS			1.12009	0.00320928	P.III	III.B.2 membrane, outer	Probable outer membrane lipoprotein		Q92M53
SMc04019	hemH	CDS	-2.36654	0.000512143			P.II	I.B.4 heme, porphyrin	Probable ferrochelatase	K01772	Q92M52
SMc04023	exoN2	CDS	2.51548	0.000512143			P.II	III.A.1 surface polysaccharides/antigens	Probable UTP--glucose-1-phosphate uridylyltransferase	K00963	Q92M48
SMc04030		CDS	-1.21197	0.000512143	-1.47158	0.000512143	P.I	VI.C Hypothetical/Global homology	Hypothetical transmembrane protein	K14347	Q92M43
SMc04045	ilvD2	CDS	-1.64107	0.000512143			P.II	I.A.2 isoleucine/valine	Probable dihydroxy-acid dehydratase	K01687	Q92M28
SMc04047	azu2	CDS			1.39959	0.000512143	P.III	I.G.1 electron transport	Probable pseudoazurin (blue copper protein)		Q92M26
SMc04048		CDS			1.15595	0.00137247	P.III	I.G.1 electron transport	Putative cytochrome C		Q92M25
SMc04049	sorT	CDS			1.54524	0.000512143	P.III	I.F.3 sulfur metabolism	Sulfite oxidase	K00387	Q92M24
SMc04050		CDS			1.59877	0.00482954	P.III	VI.B Hypothetical/Partial homology	Hypothetical transmembrane protein		Q92JW8
SMc04051	rpoE4	CDS			1.61977	0.00805017	P.III	II.B.6 RNA synthesis, modification , DNA transcription	Putative RNA polymerase sigma-E factor (sigma-24) protein	K03088	Q92M23
SMc04057		CDS	-1.09433	0.00632638			P.II	VI.C Hypothetical/Global homology	Conserved hypothetical protein		Q92M17
SMc04058		CDS	-1.48134	0.00250247			P.II	VI.C Hypothetical/Global homology	Conserved hypothetical protein		Q92M16
SMc04084	pdxK	CDS	-1.36377	0.000512143			P.II	I.B.10 pyridoxine	Putative pyridoxal kinase	K00868	Q92KX9
SMc04085		CDS			1.47187	0.000512143	P.III	VI.C Hypothetical/Global homology	Conserved hypothetical protein	K15371	Q92KX8
SMc04089		CDS	-1.38587	0.000512143	-1.00102	0.00749637	P.I	VI.C Hypothetical/Global homology	Conserved hypothetical protein		Q92KX5
SMc04090	rsmB1	CDS	-1.49027	0.00176271			P.II	III.C.1 ribosomes - maturation and modification	Putative ribosomal RNA small subunit methyltransferase B	K03500	Q92KX4
SMc04094		CDS	-2.83903	0.000512143	-1.00507	0.00995897	P.I	VI.C Hypothetical/Global homology	Conserved hypothetical protein	K09987	Q92KX1
SMc04110	cpaD1	CDS	-1.60286	0.000512143			P.II	III.A.2 surface structures	Pilus assembly protein cpaD	K02281	Q92KU4
SMc04111	cpaC1	CDS	-1.86073	0.000512143			P.II	III.A.2 surface structures	Pilus assembly protein	K02280	Q92T41
SMc04112	cpaB1	CDS	-1.67614	0.000512143			P.II	III.A.2 surface structures	Putative pilus assembly signal peptide protein	K02279	Q92T42
SMc04113	cpaA1	CDS			-0.96677	0.00970149	P.III	III.A.2 surface structures	Putative pilus assembly transmembrane protein	K02278	Q92T43
SMc04117		CDS	-1.17985	0.00176271			P.II	VI.C Hypothetical/Global homology	Conserved hypothetical transmembrane protein		Q92T45
SMc04118		CDS	-2.23496	0.000512143			P.II	VI.C Hypothetical/Global homology	Conserved hypothetical transmembrane protein		Q92T46
SMc04127		CDS	-1.49511	0.00482954			P.II	IV.D Transport of small molecules	ABC transporter,ATP-binding protein	K23537	Q92T55
SMc04128		CDS	2.12763	0.000512143	2.18953	0.000512143	P.I	IV.D.4 Cations	Putative heavy metal transporting ATPase	K01534	Q92T56
SMc04130		CDS	2.69887	0.000512143			P.II	VI.C Hypothetical/Global homology	Conserved hypothetical protein		Q92T58
SMc04138		CDS	1.56803	0.00482954			P.II	I Small Molecule Metabolism	Oxidoreductase		Q92T66
SMc04146		CDS	2.84188	0.000512143	2.18264	0.000512143	P.I	I.I.4 carbon compounds	Putative phosphoketolase	K01621	Q92T74
SMc04163		CDS			1.35795	0.00137247	P.III	VI.A Not classified regulator	Transcription regulator lysR family		Q92P07
SMc04167		CDS	2.22822	0.000512143	2.65069	0.000512143	P.I	IV.D.4 Cations	Putative cation efflux transporter		Q92P03
SMc04169		CDS			2.89731	0.000512143	P.III	VI.A Not classified regulator	Transcription regulator AraC family		Q92P01
SMc04171		CDS	2.91174	0.000512143	4.58271	0.000512143	P.I	VI.C Hypothetical/Global homology	Hemolysin-type calcium-binding protein		Q92NZ9
SMc04172	cyaH	CDS			1.87882	0.000512143	P.III	I.E.1 global regulatory functions	Adenylate/guanylate cyclase		Q92NZ8
SMc04173		CDS	1.58692	0.000512143	1.3809	0.00420562	P.I	VI.C Hypothetical/Global homology	Conserved hypothetical protein		Q92NZ7
SMc04174		CDS	1.23273	0.00285916			P.II	VI.B Hypothetical/Partial homology	Hypothetical signal peptide protein		Q92K69
SMc04183		CDS	2.09971	0.000512143			P.II	VI.C Hypothetical/Global similarity	Hypothetical transmembrane protein		Q92NY9
SMc04188		CDS	1.91415	0.00513758			P.II	VI.C Hypothetical/Global homology	Conserved hypothetical protein		Q92NY4
SMc04190		CDS			1.14431	0.00137247	P.III	VI.C Hypothetical/Global homology	Hypothetical protein signal peptide		Q92NY3
SMc04194		CDS	3.11092	0.000512143	2.51999	0.000512143	P.I	VI.C Hypothetical/Global homology	Putative transmembrane protein		Q92NY2
SMc04198		CDS	-1.07206	0.00420562			P.II	V.D Phage-related functions and prophages	Phage-related repressor protein C		Q92NY0
SMc04209		CDS	-1.14084	0.00573901	-1.09833	0.00573901	P.I	VI.C Hypothetical/Global similarity	Hypothetical protein		Q92NX1
SMc04212		CDS	-1.63825	0.000512143			P.II	VI.A Not classified regulator	Putative sensor histidine kinase transmembrane protein	K07716	Q92P99
SMc04214	cobU	CDS	-1.62126	0.000512143			P.II	I.B.3 cobalamin	Probablenicotinate-nucleotide--dimethylbenzimidazolephosphoribosyltransferase	K00768	Q92P98
SMc04224		CDS	1.3592	0.00544021			P.II	VI.B Hypothetical/Partial homology	Hypothetical protein		Q92K82
SMc04226		CDS	-1.45072	0.000512143			P.II	II.A.4 degradation of proteins, peptides, glycopeptides	Putative protease inhibitor		Q92K80
SMc04227	mcpV	CDS	-1.88092	0.000512143			P.II	IV.C Mobility chemotaxis	Probable chemoreceptor (methyl-accepting chemotaxis) transmembrane protein	K03406	Q7APD1
SMc04230		CDS	-1.90427	0.000512143			P.II	VI.C Hypothetical/Global homology	Hypothetical transmembrane signal peptide protein	K09922	Q92P89
SMc04232		CDS	2.19965	0.000512143			P.II	VI.C Hypothetical/Global homology	Putative glycine-rich protein		Q92P87
SMc04234	cspA4	CDS	-1.88869	0.000512143			P.II	IV.F.1 adaptations, atypical conditions	Cold shock protein	K03704	Q92P86
SMc04236		CDS	5.36499	0.000512143	1.9711	0.00137247	P.I	III.B Cell envelope	Putative glycine-rich cell wall structural transmembrane protein	K18481	Q92P84
SMc04238		CDS	1.71663	0.000512143	1.98595	0.000512143	P.I	VI.C Hypothetical/Global homology	Conserved hypothetical protein		Q92P82
SMc04239		CDS	4.03992	0.000512143	4.98259	0.000512143	P.I	VI.C Hypothetical/Global homology	Hypothetical protein		Q92P81
SMc04240		CDS			1.21194	0.00285916	P.III	VI.C Hypothetical/Global homology	Conserved hypothetical protein	K16165	Q92P80
SMc04246		CDS	3.1705	0.000512143			P.II	VI.B Hypothetical/Partial homology	Hypothetical transmembrane signal peptide protein		Q92K77
SMc04252		CDS	-1.1311	0.00137247			P.II	I Small Molecule Metabolism	Probable oxidoreductase	K19265	Q92P71
SMc04260		CDS	-1.80522	0.000512143			P.II	VI.A Not classified regulator	Probable transcriptional regulator	K02529	Q92P63
SMc04263		CDS	-1.24626	0.000512143	-1.03562	0.00482954	P.I	IV.D.2 amino acids, amines, peptides	Putative sodium:alanine symporter family protein	K03310	Q92P60
SMc04264		CDS	-1.23157	0.0091608			P.II	VI.A Not classified regulator	Putative transcriptional regulator		Q92P59
SMc04267	lpsS	CDS	4.71437	0.000512143			P.II	III.A.1 surface polysaccharides/antigens	LPS sulfotransferase		Q92K61
SMc04270	adhA2	CDS	-1.92957	0.000512143			P.II	I Small Molecule Metabolism	Probable alcohol dehydrogenase	K00001	Q92P55
SMc04271		CDS	1.48595	0.000512143	1.73548	0.000512143	P.I	VI.C Hypothetical/Global homology	Conserved hypothetical protein	K06998	Q92NW9
SMc04273		CDS	-1.34488	0.000512143			P.II	I.C Fatty acid biosynthesis	Putative 3-oxoacyl-acyl-carrier-protein synthase	K09458	Q92P54
SMc04275	fabF2	CDS	-2.02947	0.000512143			P.II	I.C Fatty acid biosynthesis	Probable 3-oxoacyl-ACP synthase II	K09458	Q92P53
SMc04278	acpXL	CDS	-1.47504	0.000512143			P.II	I.C Fatty acid biosynthesis	Acyl carrier protein,involved in the transfer of long hydroxylated fatty acids to lipid A		Q92P51
SMc04283		CDS	1.71569	0.0009592			P.II	IV.D Transport of small molecules	Putative TRAP-type permease		Q92NW4
SMc04289		CDS	1.82966	0.000512143	2.36156	0.000512143	P.I	IV.D Transport of small molecules	Putative TRAP-type periplasmic solute-binding protein		Q92NW2
SMc04291		CDS			2.46823	0.000512143	P.III	I Small Molecule Metabolism	Putative L-sorbosone dehydrogenase (sndh) protein		Q92NW1
SMc04292	cyaF3	CDS	2.06483	0.000512143	2.60993	0.000512143	P.I	I.E.1 global regulatory functions	Probable adenylate/guanylate cyclase		Q92NW0
SMc04298		CDS	2.93489	0.00661481			P.II	VI.C Hypothetical/Global homology	Conserved hypothetical protein		Q92K59
SMc04299		CDS	3.63491	0.000512143	4.25211	0.000512143	P.I	VI.B Hypothetical/Partial homology	Hypothetical protein		Q92K58
SMc04300		CDS	6.08371	0.00452512			P.II	IV.D Transport of small molecules	ABC transport protein,ATP-binding component	K02010	Q92NV9
SMc04306		CDS			2.15581	0.00832418	P.III	VI.B Hypothetical/Partial homology	Hypothetical protein		Q92K75
SMc04307	cyaD2	CDS	1.51156	0.00176271	1.62078	0.000512143	P.I	I.E.1 global regulatory functions	Adenylate/guanylate cyclase transmembrane protein	K01768	Q92P33
SMc04309	cobQ	CDS	-1.36852	0.000512143			P.II	I.B.3 cobalamin	Probable cobyric acid synthase	K02232	Q92P31
SMc04311		CDS			1.19756	0.00176271	P.III	IV.D Transport of small molecules	ABC transporter,periplasmic substrate binding protein	K02002	Q92P29
SMc04312		CDS	1.09855	0.00661481			P.II	VI.B Hypothetical/Partial homology	Hypothetical protein	K07746	Q92P27
SMc04316		CDS	7.8993	0.000512143	7.23341	0.000512143	P.I	IV.D Transport of small molecules	ABC transporter,permease component	K02011	Q92NV8
SMc04317		CDS	8.99977	0.000512143	8.62041	0.000512143	P.I	IV.D Transport of small molecules	ABC transporter,periplasmic solute-binding component	K02012	Q7APD0
SMc04318	cspA1	CDS			1.46851	0.00176271	P.III	IV.F.1 adaptations, atypical conditions	Cold shock transcriptional regulator	K03704	Q9Z3S6
SMc04319		CDS			1.1007	0.00387636	P.III	IV.F Adaptation	Putative cold shock protein		Q7APC9
SMc04320	rpsU1	CDS			1.03298	0.0091608	P.III	III.C.2 ribosomal proteins - synthesis, modification	3S ribosomal protein S21	K02970	Q9Z3S4
SMc04321	gst10	CDS			1.06027	0.00944057	P.III	VI MISCELLANEOUS	Putative glutathione S-transferase	K00799	Q92NV7
SMc04322	mocA	CDS			1.52716	0.000512143	P.III	I Small Molecule Metabolism	Putative oxidoreductase		Q92NV6
SMc04325	bmt	CDS	-1.99713	0.000512143			P.II	I Small Molecule Metabolism	Betaine-homocysteine methyltransferase	K00548	Q92P25
SMc04330	mttB1	CDS			1.47118	0.000512143	P.III	I Small Molecule Metabolism	Putative trimethylamine methyltransferase	K14083	Q92P20
SMc04331	mtbC	CDS	1.33187	0.00420562	1.6853	0.000512143	P.I	I.B Biosynthesis of cofactors, carriers	Putative dimethylamine corrinoid protein	K00548	Q92P19
SMc04339		CDS	2.35253	0.00387636	3.02964	0.000512143	P.I	VI.B Hypothetical/Partial homology	Hypothetical protein		Q92K71
SMc04340		CDS	2.41543	0.000512143	3.72854	0.000512143	P.I	I Small Molecule Metabolism	Oxidoreductase	K00297	Q92P13
SMc04341		CDS	1.74154	0.00602255			P.II	IV.D Transport of small molecules	Periplasmic substrate-binding protein	K02002	Q92NV4
SMc04342		CDS			1.54608	0.000512143	P.III	I Small Molecule Metabolism	Methyltransferase	K00548	Q92P12
SMc04343	cyaJ	CDS	1.27294	0.0009592			P.II	I.E.1 global regulatory functions	Putative adenylate/guanylate cyclase transmembrane protein		Q92NV3
SMc04345		CDS			1.7255	0.00285916	P.III	VI.B Hypothetical/Partial homology	Hypothetical protein		Q92K70
SMc04346	ilvC	CDS	-3.60251	0.000512143	-3.77205	0.000512143	P.I	I.A.2 isoleucine/valine	Ketol-acid reductoisomerase	K00053	Q52955
SMc04348		CDS	-1.43911	0.000512143	-3.65723	0.000512143	P.I	VI.A Not classified regulator	Transcription regulator,TetR family		Q92NV1
SMc04350	macA	CDS	1.1871	0.00320928			P.II	IV.G.2 drug/analog sensitivity and resistance	Putative macrolide-specific efflux protein	K13888	Q92NV0
SMc04359		CDS	-1.56703	0.000512143			P.II	VI.B Hypothetical/Partial homology	Hypothetical transmembrane protein		Q92K55
SMc04381	opgC	CDS	3.02238	0.000512143	2.112	0.000512143	P.I	III.A.1 surface polysaccharides/antigens	Putative glucan succinyltransferase,may be involved in succinylation of cyclic-beta-1,2-glucans		Q92L11
SMc04385		CDS			1.03288	0.00544021	P.III	I Small Molecule Metabolism	Putative aldehyde dehydrogenase transmembrane protein	K00128	Q92L07
SMc04396		CDS	-1.18007	0.00176271			P.II	IV.D.3 carbohydrates, organic acids, alcohols	Putative dextrin ABC transporter,periplasmic solute-binding component	K17315	Q92KZ7
SMc04405	leuB	CDS	-2.19494	0.000512143			P.II	I.A.1 leucine	Probable 3-isopropylmalate dehydrogenase	K00052	Q92KY8
SMc04410	asd	CDS	-1.90323	0.000512143			P.II	I.A.13 lysine	Putative aspartate-semialdehyde dehydrogenase	K00133	Q92KY2
SMc04434	rpmH	CDS	-1.96077	0.000512143			P.II	III.C.2 ribosomal proteins - synthesis, modification	Probable 5S ribosomal protein L34	K02914	Q92SF3
SMc04436	relE	CDS			-2.25802	0.00995897	P.III	VI MISCELLANEOUS	Putative toxin RelE	K06218	Q92Q75
SMc04439		CDS			1.24144	0.00137247	P.III	IV.D Transport of small molecules	Putative ABC-transporter ATP-binding protein	K02000	Q92P28
SMc04449	cpdB	CDS	1.74892	0.000512143	2.61368	0.000512143	P.I	I.F.1 salvage of nucleosides and nucleotides	Probable 2',3'-cyclic-nucleotide 2'-phosphodiesterase precursor protein	K01119	Q926C9
SMc04450	mfd	CDS	-1.81108	0.000512143			P.II	II.B.8 DNA - replication, repair, restr./modif.	Probable transcription-repair coupling factor (TRCF) protein	K03723	Q92PS9
SMc04452	ndh	CDS	-2.45356	0.000512143			P.II	I.H.3 aerobic respiration	Putative NADH dehydrogenase transmembrane protein	K03885	Q92NU3
SMc04454		CDS	-1.89928	0.000512143			P.II	IV.D Transport of small molecules	Putative ATP-binding ABC transporter	K15738	Q92NJ9
SMc04458	secA	CDS	-2.25043	0.000512143	-1.2835	0.0009592	P.I	IV.E.2 protein, peptide secretion	Probable preprotein translocase SecA subunit	K03070	Q92MI9
SMc04463		CDS	-1.43765	0.00944057			P.II	VI.C Hypothetical/Global homology	Conserved hypothetical protein		Q92T91
[truncated: 38 more rows]

## Sheet: Table legend
Supplementary Table S3. Phosphate-responsive genes. List of genes with significant 2-fold or greater expression changes in response to phosphate stress. Columns include the gene (A); gene name if given (B); type of sequence where CDS= coding region and ncRNA = non-coding RNA (C); log2 fold change and q-value for the PSRN comparison (D, E) and PSRn comparison (F, G); Cluster assignment as discusse…
